# Supplementary material for: Measuring shared decision-making and collaborative goal setting in community rehabilitation: a focused ethnography using cross-sectional surveys in Canada
Source: PubMed Central journal article supplement — BMJ Open. 2020 Aug 20;10(8):e034745. doi: 10.1136/bmjopen-2019-034745 (PMC7443299; doi:10.1136/bmjopen-2019-034745), 2020-08-20
Supplement: bmjopen-2019-034745.draft_revisions.pdf [file bmjopen-2019-034745.draft_revisions.pdf]

# BMJ Open

BMJ Open is committed to open peer review. As part of this commitment we make the peer review history of every article we publish publicly available.

When an article is published we post the peer reviewers' comments and the authors' responses online. We also post the versions of the paper that were used during peer review. These are the versions that the peer review comments apply to.

The versions of the paper that follow are the versions that were submitted during the peer review process. They are not the versions of record or the final published versions. They should not be cited or distributed as the published version of this manuscript.

BMJ Open is an open access journal and the full, final, typeset and author-corrected version of record of the manuscript is available on our site with no access controls, subscription charges or pay-per-view fees (<http://bmjopen.bmj.com>).

If you have any questions on BMJ Open's open peer review process please email [info.bmjopen@bmj.com](mailto:info.bmjopen@bmj.com)

# BMJ Open

## Measuring Shared Decision-Making and Collaborative Goal-Setting in Community Rehabilitation: A Focused Ethnography Using a Prospective Cohort

|                               |                                                                                                                                                                                                                                                                                                                     |
|-------------------------------|---------------------------------------------------------------------------------------------------------------------------------------------------------------------------------------------------------------------------------------------------------------------------------------------------------------------|
| Journal:                      | <i>BMJ Open</i>                                                                                                                                                                                                                                                                                                     |
| Manuscript ID                 | bmjopen-2019-034745                                                                                                                                                                                                                                                                                                 |
| Article Type:                 | Original research                                                                                                                                                                                                                                                                                                   |
| Date Submitted by the Author: | 04-Oct-2019                                                                                                                                                                                                                                                                                                         |
| Complete List of Authors:     | Manhas, Kiran; Alberta Health Services, Strategic Clinical Networks<br>Olson, Karin; University of Alberta, Faculty of Nursing<br>Churchill, Katie; Alberta Health Services, Health Professions, Strategy & Practice<br>Vohra, Sunita; University of Alberta, Pediatrics<br>Wasylak, Tracy; Alberta Health Services |
| Keywords:                     | REHABILITATION MEDICINE, MEDICAL ETHICS, HEALTH SERVICES ADMINISTRATION & MANAGEMENT, Quality in health care < HEALTH SERVICES ADMINISTRATION & MANAGEMENT, ETHICS (see Medical Ethics)                                                                                                                             |
|                               |                                                                                                                                                                                                                                                                                                                     |

SCHOLARONE™  
Manuscripts

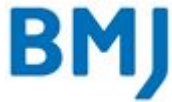

I, the Submitting Author has the right to grant and does grant on behalf of all authors of the Work (as defined in the below author licence), an exclusive licence and/or a non-exclusive licence for contributions from authors who are: i) UK Crown employees; ii) where BMJ has agreed a CC-BY licence shall apply, and/or iii) in accordance with the terms applicable for US Federal Government officers or employees acting as part of their official duties; on a worldwide, perpetual, irrevocable, royalty-free basis to BMJ Publishing Group Ltd ("BMJ") its licensees and where the relevant Journal is co-owned by BMJ to the co-owners of the Journal, to publish the Work in this journal and any other BMJ products and to exploit all rights, as set out in our [licence](#).

The Submitting Author accepts and understands that any supply made under these terms is made by BMJ to the Submitting Author unless you are acting as an employee on behalf of your employer or a postgraduate student of an affiliated institution which is paying any applicable article publishing charge ("APC") for Open Access articles. Where the Submitting Author wishes to make the Work available on an Open Access basis (and intends to pay the relevant APC), the terms of reuse of such Open Access shall be governed by a Creative Commons licence – details of these licences and which [Creative Commons](#) licence will apply to this Work are set out in our licence referred to above.

Other than as permitted in any relevant BMJ Author's Self Archiving Policies, I confirm this Work has not been accepted for publication elsewhere, is not being considered for publication elsewhere and does not duplicate material already published. I confirm all authors consent to publication of this Work and authorise the granting of this licence.

1  
2  
3 **Journal:** *BMJ Open*  
4  
5

6 **Title:** Measuring Shared Decision-Making and Collaborative Goal-Setting in  
7 Community Rehabilitation: A Focused Ethnography Using a Prospective Cohort  
8  
9

10  
11 **Authors:**  
12  
13

14 Kiran Pohar Manhas<sup>a,b,\*</sup>, Karin Olson<sup>b,c</sup>, Katie Churchill<sup>a,d,e</sup>, Sunita Vohra<sup>b,f</sup>, and Tracy  
15 Wasylak<sup>a,g</sup>  
16  
17

18  
19 <sup>a</sup> Alberta Health Services, Calgary, Canada ([Kiran.poharmanhas@ahs.ca](mailto:Kiran.poharmanhas@ahs.ca))  
20  
21

22 <sup>b</sup> Integrative Health Institute, University of Alberta, Edmonton, Canada  
23  
24

25 <sup>c</sup> Faculty of Nursing, University of Alberta, Edmonton, Canada  
26 ([karin.olson@ualberta.ca](mailto:karin.olson@ualberta.ca))  
27  
28

29  
30 <sup>d</sup> Department of Clinical Neurosciences, Cumming School of Medicine, University of  
31 Calgary, Calgary, Canada ([Katie.churchill@ahs.ca](mailto:Katie.churchill@ahs.ca))  
32  
33

34  
35 <sup>e</sup> Department of Occupational Therapy, University of Alberta, Edmonton, Canada  
36  
37

38  
39 <sup>f</sup> Departments of Pediatrics and Psychiatry, Faculty of Medicine & Dentistry,  
40 University of Alberta, Edmonton, Canada ([svohra@ualberta.ca](mailto:svohra@ualberta.ca))  
41  
42

43  
44 <sup>g</sup> Faculty of Nursing, University of Calgary, Calgary, Canada ([tracy.wasylak@ahs.ca](mailto:tracy.wasylak@ahs.ca))  
45  
46

47 \*Corresponding Author contact information:  
48  
49

50 Kiran Pohar Manhas  
51 c/o Strategic Clinical Networks™  
52 Alberta Health Services  
53 Southport Tower, 10301 Southport Lane SW  
54  
55  
56  
57  
58  
59  
60

1  
2  
3 Calgary, Alberta T2W 1S7

4 Tel: 587-774-7734

5 Fax: unavailable

6 Email: [kiran.poharmanhas@ahs.ca](mailto:kiran.poharmanhas@ahs.ca)  
7  
8  
9

10  
11 **Manuscript Word Count: 4427**  
12

13  
14  
15 **ABSTRACT** (250 words)  
16

17  
18 **Objective:** To measure shared decision-making (SDM) experience from the perspective  
19 of patients and providers in diverse community-rehabilitation settings.  
20  
21

22  
23 **Design:** Prospective, longitudinal surveys  
24

25  
26 **Setting:** 13 primary level-of-care community-rehabilitation sites in diverse areas  
27 varying in geography, patient population, and provider discipline  
28  
29

30  
31 **Subjects:** 341 adult, English-speaking patient-participants, and 66 provider-  
32 participants  
33  
34

35  
36 **Measures:** ASK-MI (dyadic tool measuring SDM), WatLX™ (outpatient rehabilitation  
37 experience), and demographic questionnaire. Survey packages distributed at two time-  
38 points (T0=recruitment; T1=3-months-later)  
39  
40

41  
42 **Results:** We found that amongst 341 patient-provider dyads, 26.4% agreed that the  
43 appointment at recruitment involved high-quality SDM. Patient perceptions of goal-  
44 setting suggested that 19.6% of patients did not set a goal for their care, and only 11.4%  
45 set goals in functional language that tied directly to an activity/role/responsibility that  
46 was meaningful to their life. Better SDM was clinically associated with higher total  
47 family income (p=0.045), more privacy during the appointment (p=0.070), regional-  
48 urban settings (p=0.068), and provider participation in person-centred behaviour-  
49 change training (p=0.091).  
50  
51  
52  
53  
54  
55  
56  
57  
58  
59

1  
2  
3 **Conclusions:** These findings clarify that there is a need to improve the consistency  
4 and quality of SDM and goal-setting in community rehabilitation. For patients, lower  
5 ratings of SDM corresponding to less recognition of their preferences, which is the  
6 heart of SDM. Actionable strategies include privacy promotion, person-centred  
7 training, and developing strategies to identify and support financially-vulnerable  
8 patients. Study limitations include recall bias, the Hawthorne effect, acquiescence and  
9 social desirability bias. We recommend more research into strategies that advance  
10 highly-functional goal-setting with patients, and that lessen survey ceiling effects.  
11  
12  
13  
14  
15  
16

### 17 **Article Summary: Strengths and limitations of the study**

- 19 • One strength is that this study has a significant sample size, with 341  
20 patient participants completing surveys.
- 21 • Another strength is that participant diversity allows for statistically-  
22 appropriate comparisons based on geography, level of privacy, patient  
23 demographics, and provider training.
- 24 • Study limitations include that the survey measuring shared decision-  
25 making is novel, has a floor effect, and may be subject to acquiescence and  
26 social desirability biases.  
27  
28  
29  
30  
31  
32  
33  
34

35 **Keywords:** shared decision-making, community, rehabilitation, patient perspectives,  
36 provider perspectives, survey, goal-setting  
37  
38  
39  
40  
41  
42  
43  
44  
45  
46  
47  
48  
49  
50  
51  
52  
53  
54  
55  
56  
57  
58  
59  
60

## Introduction

Measurement of shared decision-making (SDM) remains challenging, but necessary [1–3]. Internationally, mandates call for greater patient engagement in healthcare and health research [4–8]. Accurate measurement of SDM is necessary to confirm the realization of such mandates. Shared decision-making (SDM) is a decision-making process wherein provider(s) and patient contribute and collaborate by sharing best available evidence as well as patient values, preferences and lived experience [9, 10].

The plethora of SDM definitions have contributed to many different tools being developed [1, 11, 12]. To date, SDM measurement tools do not correlate with SDM teaching. No universally-accepted standard outcome or experience measure exists to assess SDM [1], particularly for non-physician interactions. A 2015 review found that only four of 13 SDM tools involved patients during their development [3], bringing into question content validity. Potentially inaccurate presumptions remain that patients are aware of ‘decision points’ and that only one decision point exists per consult [3].

The conceptualization and operationalization of SDM has further challenged understanding, and measurement, of SDM. Some approaches to SDM have become quite technical, tokenistic and rote; these often involve checklists and expectations met in theory, but lack full collaboration [13]. Humanistic approaches to SDM are more collaborative, engaging and transparent; it requires “...understanding of the person and their human situation and working together to discuss and form ways forward that make sense for each person and their situation” [13]. A systematic review (n=154 studies) revealed that prospective studies assessing SDM in clinical settings rarely examined the humanistic aspects of patient-clinician communication such as respect, compassion, integrity, empathy: only 9% of 154 studies contained any remark on humanistic communication [13].

Qualitative research by team members revealed challenges with a previously-published SDM tool (SDM-Q-9) in primary care and mental health settings [14]. Challenges included inability to capture the SDM phase when problems are discussed and prioritized; the lack of a “not applicable” option; an over-emphasis on medical conditions; a lack of relevance for non-pharmacological interventions; and, the lack of recognition that SDM is valuable in goal-setting, investigations, as well as (as opposed to exclusively for) exploring treatment options [Olson K, et al. “Development of the Alberta Shared Decision-Making Measurement Instrument” *Under Review*].

1  
2  
3 A novel, dyadic SDM tool was developed: the Alberta Shared decision-making  
4 Measurement Instrument (ASK-MI) (Figure 1 is the patient version; provider version is  
5 same except language transposed to address provider). Using a 6-point Likert Scale  
6 (with not-applicable option), patients and providers independently describe the  
7 appointment experience from a SDM-process perspective. This process involves patients  
8 and providers agreeing on the main concern; working together to make a plan that  
9 considers patients' wishes; and, ensuring the provider confirms patient understanding  
10 and next steps. The ASK-MI was developed and piloted in primary care and mental  
11 health clinics in Alberta [14].  
12

13  
14 This research program used this tool in community rehabilitation, an under-studied  
15 context regarding SDM [15]. For patients and providers of diverse community-  
16 rehabilitation sites across a single province in an industrialized country, we aimed to:

- 17  
18 (a) measure the prevalence of high-quality SDM experiences using the ASK-MI tool;  
19  
20 (b) measure goal-setting perceptions by patients;  
21  
22 (c) determine any associations between SDM experience (ASK-MI score) and  
23  
24 demographic and contextual factors (e.g. geography, patient and provider age,  
25  
26 gender, discipline).  
27

28  
29 This study complements another in this population that used qualitative interviews to  
30 explore SDM experiences [16]. While the dyadic ASK-MI moves towards illuminating the  
31 humanistic communication, or lack thereof, in SDM, the complementary qualitative  
32 study explored this concept in great detail. The research team included two patient-co-  
33 investigators who consulted on the research design, implementation and results  
34 dissemination.  
35  
36  
37  
38  
39  
40  
41

## 42 **Methods**

43 We used focused ethnography in this research program [17]. Ethnography involves  
44 making cultural inferences “(1) from what people say; (2) from the way people act; and  
45 (3) from the artifacts people use” [18]. We focused on the communities of patients and  
46 professionals composing diverse community-rehabilitation sites across a provincial  
47 geography. Focused ethnography features a problem-focused and context-specific  
48 approach; a focus on a discrete phenomenon; the conceptual orientation of a single  
49 researcher; involvement of limited participants; episodic participant observation;  
50 participants with specific knowledge; and an emphasis on academic and healthcare  
51  
52  
53  
54  
55  
56  
57  
58  
59



1  
2  
3 settings [19, 20]. We met all criteria save participant observation due to feasibility  
4 constraints.  
5  
6  
7

### 8 Participant Population

9  
10 We captured diverse rehabilitation settings that saw outpatients including both  
11 public and private provider sites, as well as three geographic types (rural (population <  
12 10000), regional-urban (population between 10000 and 100000), and metropolitan-  
13 urban (where population > 100000)).  
14  
15

16 Participants included current patients and providers visiting and working,  
17 respectively, at study sites. Provider inclusion criterion was employment at the site at  
18 recruitment. Patient inclusion criteria included  $\geq 18$  years of age; their provider was  
19 participating; able to consent without proxy; and can understand and speak English.  
20  
21 There were no exclusion criteria.  
22  
23

### 24 Recruitment

25  
26 Site leadership informed provider recruitment. Tactics included email introductions  
27 followed by study presentations (by webinar, in-person, or one-on-one). After  
28 discussions, informed consent was procured.  
29  
30

31 Convenience sampling directed patient recruitment. Management identified onsite  
32 recruiters from clerical and therapy-assistant staff. Researchers trained recruiters to  
33 identify eligible patients, discuss participation, and record those patients accepting  
34 take-home study packages. While provider-participants may have mentioned the study  
35 to patients, only onsite recruiters distributed surveys. Recruitment was bounded by a  
36 four-week site maximum and a 20-patient limit per provider to minimize site and  
37 provider burden. Patient consent was implied by the mailed return of surveys; written  
38 consent was required for future data sharing and future research contact.  
39  
40  
41  
42  
43  
44

### 45 Data Collection

46  
47 We used validated surveys to measure SDM (ASK-MI tool), quality of life and patient  
48 experience (WatLX™ survey) over two time-points (T0=baseline at recruitment; T1=3-  
49 months post-baseline). Demographic and contextual data was collected from  
50 participants at T0. Survey completion took 5-7 minutes per time-point.  
51  
52

53 The dyadic ASK-MI tool requires patient and provider to independently rate six facets  
54 of the SDM experience; lower numeric scores reflect higher quality SDM. Individual  
55  
56  
57  
58  
59

1  
2  
3 scores are summed; the two sum scores are compared to determine the final rating  
4 score: Excellent, Acceptable, or Unacceptable. When both patient and provider rate SDM  
5 highly, an Excellent rating score is reached. Disparity between parties would lead to a  
6 lower ASK-MI rating score. Full agreement on SDM Excellence equates to patient and  
7 provider both giving the best, lowest numeric score on each ASK-MI item. Using self-  
8 report, we collected contextual (e.g. group or individual appointment; were goals set with  
9 provider) and participant demographic data (e.g. age, gender, marital status).

14 The WatLX™ is a 2-page outpatient rehabilitation care patient experience survey  
15 meant for post-completion of rehabilitation care. The WatLX™ consists of 10 questions,  
16 where respondents can respond either not applicable or on a 7-point Likert scale.  
17 Psychometric testing of the WatLX™ involved 1174 cognitively-intact, English-speaking,  
18 adult outpatients who had completed a program of cardiac, musculoskeletal, neurologic,  
19 stroke, pulmonary, or speech language rehabilitative care in Ontario [21]. Reliability  
20 analyses compared the use of a 7-point to 5-point Likert scale in the WatLX™.  
21 Cronbach's alphas were 0.863 and 0.957 for the 5 and 7-point scale, and the ICC =  
22 0.827 and 0.880, respectively [21]. Generally, the higher the score, the more positive the  
23 patient experience. There is evidence of ceiling effects with the WatLX™.

31 The T0 take-home study package included a consent form and directions, the ASK-  
32 MI survey, a patient demographic form including their communication preference for  
33 the 3-month follow-up (T1) surveys (which included WatLX™). All envelopes were pre-  
34 addressed and stamped to support convenient, confidential return to the researchers.  
35 Patients were directed to complete the surveys within 24 hours, so their appointment  
36 was fresh in their mind.

40 When a patient took a study package, the recruiter logged the date, envelope  
41 number, patient's initials, and provider name. Daily, this recruitment information was  
42 sent to the lead researcher, who emailed the ASK-MI (provider version) tool to the named  
43 provider, along with the patient initials via personalized email link to REDCAP at the  
44 University of Alberta. Providers received one email per patient and had 48 hours to  
45 complete the survey.

50 The second time-point (T1), for patients only, was exactly three months post-  
51 recruitment. T1 data collection was by mail or email per patient-participant preference.  
52 Participants received email or phone reminders 1-week prior to T1, and at 7-days post-  
53 T1.  
54  
55

1  
2  
3 To ensure the accuracy of data entry of paper surveys, a randomly-selected 30% of  
4 the study sample was assessed at the close of data collection. If more than 10% of the  
5 data was incorrectly entered, then another random 30% of the study sample would have  
6 been checked. Errors were rectified immediately.  
7  
8  
9

## 10 11 Data Analysis

12 After cleaning and coding the T0 and T1 data, we completed descriptive and  
13 exploratory analyses to address the research questions. The ASK-MI Score was  
14 collapsed into two different binary categorical variables: (a) Excellent versus  
15 Acceptable/Unacceptable; and (b) Full Agreement on SDM Excellence versus Not Full  
16 Agreement on SDM Score. The secondary variable was overall rehabilitative care  
17 experience (WatLX™). Independent variables included age, gender, patient income  
18 range, geographical area, and other demographic and contextual variables.  
19  
20  
21  
22  
23

24 The distribution of interval and ratio type survey data (e.g. age) was checked for  
25 whether it is normally distributed. Test selection was based upon the results of these  
26 analysis (e.g. non-normally-distributed data was analyzed using non-parametric tests).  
27 We analyzed the questionnaire data descriptively, with means, standard deviations,  
28 both overall in community rehabilitation and based on contextual differences. For  
29 categorical data, chi-square tests directed comparisons between high versus low quality  
30 SDM; sub-analyses using tests of proportions considered this ratio of experiences in  
31 different demographic and organizational settings based on the size and quality of  
32 independent variable data collected. For the three surveys, where missing data was less  
33 than 5% across population, then used the 20% as the threshold for missing items: if ≤  
34 20% items missing, then median response used in place of the missing item to then  
35 score the survey; if > 20% of items missing, then the entire record was deleted from the  
36 analysis [22]. Univariate correlations were studied between each independent variables  
37 (age, gender, income, geographical area, provider discipline) and the ASK-MI score.  
38  
39  
40  
41  
42  
43  
44  
45  
46  
47

## 48 **Results**

### 49 50 51 Participant Information

52 Thirteen community-rehabilitation sites distributed 606 take-home survey  
53 packages; 341 patients returned them and thus implied consent to participate (response  
54  
55  
56  
57  
58  
59  
60

rate 56.2%). At T1, 209 patients returned surveys (response rate 61.3%, the remainder lost to follow-up).

Table 1 describes the patient-participant population. The patient-participants' mean (SD) age was 57.5 (16.4) years. Most patient-participants were female (58.9%), married (68.9%), Caucasian (90.9%), had some post-secondary education (70.4%), were at a 1:1 appointment with providers (90.9%), were neither at the first nor last appointment at recruitment (66.9%), and were receiving physiotherapy (68.6%). Participants varied in where they received their care: 46.3% were in an open exercise area, 48.4% were in a private area (either behind a privacy curtain or in private room), and 3.8% described their area as unique. The demographic profile was similar between T0 and T1 patient-participants.

|                                | N (%)       |
|--------------------------------|-------------|
| <b>Patient Population</b>      | 341 (100%)  |
| Mean Age in years (SD)         | 57.5 (16.4) |
| Missing                        | 3 (0.9%)    |
| <b>Gender</b>                  |             |
| Male                           | 138 (40.5%) |
| Female                         | 201 (58.9%) |
| Missing                        | 2 (0.6%)    |
| <b>Marital Status</b>          |             |
| Single                         | 48 (14.1%)  |
| Married (legal/common law)     | 235 (68.9%) |
| Separated or Divorced          | 32 (9.4%)   |
| Widowed                        | 21 (6.2%)   |
| Missing                        | 5 (1.5%)    |
| <b>Geographical Location</b>   |             |
| Metropolitan-Urban             | 145 (42.5%) |
| Regional-Urban                 | 161 (47.2%) |
| Rural                          | 35 (10.3%)  |
| <b>Education</b>               |             |
| High school diploma or less    | 96 (28.1%)  |
| Any post-secondary education   | 240 (70.4%) |
| Missing                        | 5 (1.5%)    |
| <b>Employment Status</b>       |             |
| Employed                       | 141 (41.3%) |
| Unemployed                     | 61 (17.9%)  |
| Retired                        | 135 (39.6%) |
| Missing                        | 4 (1.2%)    |
| <b>Ethnicity</b>               |             |
| European Origins               | 310 (90.9%) |
| Indigenous (e.g. Inuk, Métis)  | 10 (2.9%)   |
| Non-European Origins           | 21 (6.2%)   |
| <b>Supplementary Insurance</b> |             |
| Yes                            | 144 (42.2%) |

|                      |             |
|----------------------|-------------|
| No                   | 160 (46.9%) |
| Prefer not to answer | 37 (10.9%)  |
| Total Family Income  |             |
| Less than \$59999    | 106 (31.1%) |
| \$60000 to 99999     | 75 (22.0%)  |
| \$100000 or More     | 78 (22.9%)  |
| Prefer not to answer | 82 (24%)    |

**Table 1.** Patient-Participant Demographics

Table 2 describes the provider-participant population. The provider-participants' mean (SD) age was 41.8 (9.86) years. Experience-wise, providers had a mean (SD) of 15.1 (10.3) years of experience. Providers represented six rehabilitation disciplines, with physiotherapy (53.0%) and occupational therapy (19.7%) being most prevalent. Most providers were female (60.6%), Caucasian (60.6%), trained in Canada (66.7%), and had primarily clinical provider roles (vs. management) (71.2%).

| Provider Participant Characteristics | N (%) or Mean (SD) |
|--------------------------------------|--------------------|
| Population                           | 66                 |
| Age (years)                          | 41.83 (9.86)       |
| Missing                              | 13 (19.7%)         |
| Gender                               |                    |
| Male                                 | 13 (19.7%)         |
| Female                               | 40 (60.6%)         |
| Missing                              | 13 (19.7%)         |
| Provider Discipline                  |                    |
| Occupational Therapy                 | 13 (19.7%)         |
| Physiotherapy                        | 35 (53.0%)         |
| Other                                | 5 (7.5%)           |
| Missing                              | 13 (19.7%)         |
| Country of Training                  |                    |
| Canada                               | 44 (66.7%)         |
| Outside of Canada                    | 9 (13.6%)          |
| Missing                              | 13 (19.7%)         |
| Ethnicity                            |                    |
| European Ethnic Origins              | 40 (60.6%)         |
| Non-European Ethnic Origins          | 8 (12.1%)          |
| Missing                              | 18 (27.2%)         |
| Geographical Location                |                    |
| Metropolitan-Urban                   | 36 (54.5%)         |
| Regional-Urban                       | 24 (36.4%)         |
| Rural                                | 6 (9.1%)           |

**Table 2.** Provider-Participant Demographics

Table 3 describes the provider-participants' work settings. Providers worked a mean (SD) of 31.8 (9.0) hours/week in direct patient care, and saw a mean (SD) of 28.8 (17.6)

patients per week. The outpatient clinical settings varied for providers, including community-based (31.8%) and hospital-based (45.5%) clinics. The clinical populations included at least 10 diverse populations, including general adults (25.8%), musculoskeletal (16.7%), and neurorehabilitation (13.6%). Providers were evenly split on participation in a person-centred behaviour-change course (HealthChange® Methodology [23]): 39.4% said they had taken it, 40.9% said they had not taken it, and 19.7% responses were missing herein. Of the providers who had taken HealthChange®, most providers perceived that it influenced their patient interactions to some degree (76.9%) (vs. to a great degree (15.4%)). The perceived influence of HealthChange® on site processes was less clear: 42.3% of providers saw no influence, while 53.8% saw some degree of influence.

| Provider Participant Characteristics           | N (%) or Mean (SD) |
|------------------------------------------------|--------------------|
| Setting                                        |                    |
| Community-Based Clinic                         | 21 (31.8%)         |
| Hospital, outpatient Clinic                    | 30 (45.5%)         |
| Primary Patient Population                     |                    |
| Complex Adults                                 | 2 (3.0%)           |
| Hand/Foot/Cardiac                              | 4 (6.0%)           |
| General Adults                                 | 17 (25.8%)         |
| Musculoskeletal (MSK)                          | 11 (16.7%)         |
| Neuro                                          | 9 (13.6%)          |
| Ortho/Surgery                                  | 3 (4.5%)           |
| Seniors                                        | 4 (6.1%)           |
| Missing                                        | 16 (24.2%)         |
| Average Waitlist (days) for Clinic             | 16.59 (17.59)      |
| Missing                                        | 18 (27.3%)         |
| HealthChange® Completion                       |                    |
| Yes                                            | 26 (39.4%)         |
| No                                             | 27 (40.9%)         |
| Missing                                        | 13 (19.7%)         |
| HealthChange® Influenced Patient Interactions? |                    |
| No Influence                                   | 1 (3.8%)           |
| To Some Degree                                 | 20 (76.9%)         |
| To a Great Degree                              | 4 (15.4%)          |
| Missing                                        | 1 (3.8%)           |
| HealthChange® Influenced Site Processes?       |                    |
| No Influence                                   | 11 (42.3%)         |
| To Some Degree                                 | 14 (53.8%)         |
| To a Great Degree                              | 0 (0%)             |
| Missing                                        | 1 (3.8%)           |

**Table 3.** Provider-Participants' Clinical Setting**SDM and Goal-Setting Prevalences in Community Rehabilitation**

Using current ASK-MI scoring guidelines, 78.9% of T0 patient-provider appointments rated Excellent (Table 4). Given the evident floor effect of the ASK-MI (i.e. more than 15% of respondents have the lowest score, which is the best value [24]), the survey developers will re-assess the scoring algorithm (incomplete at time of manuscript submission).

| Shared Decision-Making Experience                                       | N (%) or Mean (SD) |
|-------------------------------------------------------------------------|--------------------|
| ASK-MI Score                                                            |                    |
| Excellent                                                               | 269 (78.9%)        |
| Acceptable                                                              | 37 (10.9%)         |
| Unacceptable                                                            | 2 (0.6%)           |
| Missing/Unable to Calculate                                             | 14 (4.1%)          |
| Patient and Provider had Full Agreement on SDM Excellence               |                    |
| Full Agreement                                                          | 90 (26.4%)         |
| Less Than Full Agreement                                                | 218 (63.9%)        |
| Missing/Unable to Determine                                             | 14 (4.1%)          |
| Was a Goal Set with Provider?                                           |                    |
| Yes                                                                     | 270 (79.2%)        |
| No                                                                      | 67 (19.6%)         |
| Missing                                                                 | 4 (1.2%)           |
| Level of Functionality of the Patient-Stated Goal                       |                    |
| Highly Functional, focused on everyday activity (i.e. patient language) | 39 (11.4%)         |
| Moderately Functional, focused on general mobility                      | 140 (41.1%)        |
| Not Functional, focused on treatment plan (i.e. provider language)      | 76 (22.3%)         |
| Not Applicable, no goal was set or goal not provided                    | 86 (25.2%)         |

**Table 4.** Prevalence of Shared Decision-Making and Goal-Setting

Looking at full agreement on SDM excellence or not, at T0, 26.4% of patient-provider encounters involved full agreement on SDM excellence. Figures 2 and 3 display the frequency of responses across the 6-item Likert scale for each ASK-MI question for patients and providers, respectively. These two graphs reveal that, across the six items, providers agreed less often about SDM excellence (i.e. relatively fewer responses at 'strongly agree').

For patients, there was less agreement that the patient and provider planned together to address the patient's preferences and that the plan considered the patient's

wishes and abilities. Patients more often strongly agreed that the provider checked the patient's understanding of the plan and that there was agreement on the plan created.

For providers, there was less agreement that the patient and provider worked together to make a plan that addressed patient preferences. Providers more often strongly agreed that there was clarity and agreement on the visit's main focus; that the provider checked that patient understanding; and that the patient and provider agreed on the plan created.

Table 5 compares the three geographical settings on prevalence of high quality SDM (i.e. full agreement on SDM excellence) in patient-provider encounters, which demonstrates clinically significant differences in the quality of SDM experiences between geographical areas: metropolitan areas (19.9%) and regional areas (33.8%) (p=0.068).

| Variable                                                | Geography                                  |                                 |                             | F statistic Value (df) | P-value |
|---------------------------------------------------------|--------------------------------------------|---------------------------------|-----------------------------|------------------------|---------|
|                                                         | Metropolitan Urban Mean (SD) [95% CI] OR % | Regional Urban Mean (SD) 95% CI | Rural Mean (SD) 95% CI      |                        |         |
| Patient Age                                             | 53.36 (17.29) [50.51-56.21]                | 61.08 (14.88) [58.74,63.41]     | 57.97 (15.14) [52.77-63.17] | 8.824 (df 2)           | < 0.001 |
| Months Knew Provider Before Recruitment                 | 8.40 (14.91) [5.54,11.26]                  | 24.64 (2.39) [5.03,14.52]       | 51.76 (63.95) [25.36-78.16] | 25.88                  | <0.001  |
| % Appointments with Excellent ASK-MI Score              | 84.2%                                      | 89.0%                           | 90.9%                       | 1.91 (df 2)            | 0.384   |
| % of Appointments with Full Agreement on SDM Excellence | 19.9%                                      | 33.8%                           | 26.7%                       | 11.73 (df 6)           | 0.068   |
| % Patients Perceived that Goals were Set                | 81.3%                                      | 79.1%                           | 80.0%                       | 0.22 (df 2)            | 0.90    |
| % Perceived Goals were Functional                       | 16.4%                                      | 6.3%                            | 14.3%                       | 8.627                  | 0.196   |
| % Providers Took HealthChange® Before                   | 20.7%                                      | 56.7%                           | 40.0%                       | 37.05 (df 4)           | < 0.001 |
| % Appointments in Private Area                          | 31.7%                                      | 69.2%                           | 68.6%                       | 46.25                  | < 0.001 |
| Income                                                  |                                            |                                 |                             | 43.09                  | < 0.001 |
| Less than \$59999                                       | 26.1%                                      | 40.9%                           | 20.6%                       |                        |         |
| \$60000 to 99999                                        | 26.8%                                      | 21.4%                           | 14.7%                       |                        |         |
| \$100000 or More                                        | 37.0%                                      | 12.3%                           | 23.5%                       |                        |         |
| Prefer not to answer                                    | 10.1%                                      | 25.3%                           | 41.2%                       |                        |         |
| Rehabilitation Patient Received                         |                                            |                                 |                             | 14.07 (df 4)           | 0.007   |
| Physiotherapy                                           | 69.7%                                      | 87.2%                           | 74.3%                       |                        |         |
| Occupational Therapy                                    | 27.0%                                      | 10.6%                           | 25.7%                       |                        |         |



|       |      |      |    |  |  |
|-------|------|------|----|--|--|
| Other | 3.3% | 2.1% | 0% |  |  |
|-------|------|------|----|--|--|

**Table 5.** Comparison of Three Geographical Areas on SDM, Demographic and Contextual Variables

At T0, 19.4% of patients stated that they had not set a goal for their rehabilitation care (Figure 4). When patients had set a goal, they were asked to describe the goal. We categorized the patient-perceived goals based on level of functionality (Table 4). Functional goals speak to participation in a role, responsibility or activity that is important to the person. Less-functional goals relate solely to treatment plans or lack specificity. Only 11.4% of patients stated goals that met the RMoC definition of functionality. A broader definition of functionality includes goals that aim for general improvements in, for example, mobility or strength. Under this broad definition, 42.6% of patients perceive their rehabilitation goals as aimed towards achievements or activities important to their life (Figure 5). Some 22.3% of patients perceived goals as equal to the treatment plan (e.g. doing home exercises, coming to appointments).

#### SDM, Goal-Setting, and Associated Factors

The only patient characteristic associated with SDM was total family income wherein the lowest income bracket had less instances of full agreement on SDM excellence ( $p=0.045$ ). SDM experience quality was not associated with whether patients' perceived that goals were set or whether patients' perceived goals that were functional. SDM experience was not associated with other immutable patient characteristics (e.g. gender, education, employment status, insurance access) or appointment type (Table 6).

| Variable                          | Patient & Provider Full Agreement on SDM Excellence? |              | Pearson Chi-Square Value (df) | P-value |
|-----------------------------------|------------------------------------------------------|--------------|-------------------------------|---------|
|                                   | Yes Count (%)                                        | No Count (%) |                               |         |
| Seen Provider Before Recruitment? |                                                      |              |                               |         |
| Yes                               | 76.9%                                                | 74.4%        | 0.313 (df 2)                  | 0.855   |
| No                                | 23.1%                                                | 25.6%        |                               |         |
| Appointment Timing at Recruitment |                                                      |              |                               |         |
| First Appointment                 | 27.9%                                                | 22.6%        | 13.57 (df 6)                  | 0.035   |
| Near Start of Care                | 37.2%                                                | 35.4%        |                               |         |
| Near End of Care                  | 30.2%                                                | 38.7%        |                               |         |
| Last Appointment                  | 4.7%                                                 | 3.3%         |                               |         |
| Appointment Type                  |                                                      |              |                               |         |

|                                                                                             |                                  |                                  |                  |       |
|---------------------------------------------------------------------------------------------|----------------------------------|----------------------------------|------------------|-------|
| Group<br>Individual                                                                         | 6.6%<br>93.4%                    | 9.5%<br>90.5%                    | 0.734 (df<br>2)  | 0.693 |
| Where in Facility<br>Open Area<br>Private Area or Other                                     | 39.8%<br>60.2%                   | 49.3%<br>50.7%                   | 7.05 (df<br>3)   | 0.070 |
| Patient Perceived Goals<br>Set?<br>Yes<br>No                                                | 80.2%<br>19.8%                   | 81.7%<br>18.3%                   | 2.567 (df<br>2)  | 0.277 |
| Perceived Goals were<br>Functional?<br>Yes<br>No                                            | 14.3%<br>85.7%                   | 10.9%<br>89.1%                   | 0.793 (df<br>2)  | 0.673 |
| Female Gender                                                                               | 58.2%                            | 58.6%                            | 0.015 (df<br>2)  | 0.993 |
| Marital Status<br>Married (incl common<br>law)<br>Not, or No Longer,<br>Married             | 72.5%<br>27.5%                   | 69.9%<br>30.1%                   | 3.08 (df<br>3)   | 0.379 |
| Education<br>High school diploma<br>or less<br>Any post-secondary<br>education              | 30.8%<br>69.2%                   | 26.5%<br>73.5%                   | 2.68 (df<br>3)   | 0.443 |
| Employment<br>Employed<br>Unemployed<br>Retired                                             | 41.8%<br>16.5%<br>41.8%          | 42.9%<br>17.8%<br>39.3%          | 3.50 (df<br>6)   | 0.743 |
| Insurance<br>Yes<br>No<br>Prefer not to answer                                              | 45.1%<br>41.8%<br>13.2%          | 43.8%<br>48.4%<br>7.8%           | 7.515 (df<br>6)  | 0.276 |
| Income<br>Less than \$59999<br>\$60000 to 99999<br>\$100000 or More<br>Prefer not to answer | 33.7%<br>21.3%<br>30.3%<br>14.6% | 62.3%<br>24.5%<br>21.7%<br>22.6% | 17.269<br>(df 9) | 0.045 |
| Provider Discipline<br>Physiotherapy<br>Occupational Therapy<br>Other                       | 74.4%<br>25.6%<br>0%             | 81.3%<br>15.5%<br>3.1%           | 12.69 (df<br>6)  | 0.048 |
| Provider Took<br>HealthChange?<br>Yes<br>No                                                 | 73.9%<br>26.1%                   | 41.2%<br>58.8%                   | 11.11 (df<br>6)  | 0.085 |
| Provider Trained in<br>Canada                                                               | 85.3%                            | 83.2%                            | 0.264 (df<br>2)  | 0.877 |

**Table 6.** Relationship between Full Agreement on SDM (High Quality SDM) and Other Demographic or Contextual Factors

Clinically-significant higher levels of SDM experience were associated with earlier timing of the rehabilitation appointment (65.1% high-quality-SDM vs. 58.0% less-quality-SDM,  $p=0.035$ ), more privacy during the appointment (60.2% high-quality-SDM vs. 50.7% in low-quality-SDM,  $p=0.070$ ), non-physiotherapy (74.4% physiotherapy in high-quality-SDM vs. 81.3% physiotherapy in low-quality-SDM,  $p=0.091$ ) and if the provider had taken HealthChange® (73.9% in high-quality-SDM vs. only 41.2% high-quality-SDM if not taken,  $p=0.085$ ). SDM experience was not associated with the providers' experience (in years since graduation) or the time since the provider took HealthChange®.

SDM and goal-setting varied across the three geographical areas (Table 5). In regional-urban settings, patients experienced higher levels of SDM experience ( $p=0.068$ ) but less functional goals were set ( $p=0.066$ ). More providers had taken HealthChange® ( $p<0.001$ ) in regional settings compared to rural and metropolitan settings. There was no difference in the proportion of patients with functional goals across geographies. Demographically, more patients had lower total family income in regional areas (40.9% lowest-income-bracket vs. 26.1% (metropolitan) or 20.6% (rural),  $p<0.001$ ). Contextually, metropolitan-urban areas were unique in that fewer appointments were in private areas (31.7% vs. 69.2% in regional and 68.6% in rural,  $p<0.001$ ) and fewer providers had taken person-centred behaviour-change training (HealthChange®) (20.7% vs. 56.7% in regional and 40.0% in rural,  $p<0.001$ ). Finally, occupational therapy was represented least often in regional-urban appointments (10.6% vs. 27.0% (metropolitan) and 25.7% (rural),  $p=0.007$ ).

Patients who perceived that a goal was set for their care saw a higher proportion of occupational therapists (35.5% vs. 14.7%,  $p=0.001$ ). It appears that the clinically-relevant impact of behaviour-change training (HealthChange®), provider discipline and level of privacy had opposite relationships with goal-setting and SDM (e.g. providers who took HealthChange® were associated with more high-quality SDM experiences, but FEWER experiences of patients setting goals).

While the time a provider knew the patient before T0 was associated with whether a goal was set ( $p=0.054$ ), the variance was high. Few other patient or provider characteristics were associated with patient perceptions of goal-setting. Patient

perceptions of goal-setting for their rehabilitation did not differ by geographical setting, patient gender, marital status, education, employment status, or total family income (Table 7). Provider experience was not associated with patients' perceptions of goal-setting. Provider HealthChange® participation was not associated with patients' perception of goals setting or the functionality of the goal set.

| Variable                                                                           | Did Patient Perceive that a Goal was Set for Rehabilitation Care? |                                        | Test Statistic Value (df) | P-value |
|------------------------------------------------------------------------------------|-------------------------------------------------------------------|----------------------------------------|---------------------------|---------|
|                                                                                    | Yes<br>Mean (SD)<br>OR %                                          | No<br>Mean (SD)<br>OR %                |                           |         |
| WatLX™ Overall Rehabilitation Experience                                           | 9.034 (1.251)                                                     | 8.717 (1.953)                          | F=1.47 (df 1)             | 0.227   |
| Patient Age at T0                                                                  | 57.23 (15.92)                                                     | 57.30 (18.14)                          | F=0.001 (df 1)            | 0.974   |
| Provider's Experience                                                              | 14.05 (10.67)                                                     | 13.91 (10.17)                          | F=0.008 (df 1)            | 0.930   |
| Time Patient Knew Provider                                                         | 11.51 (24.63)                                                     | 21.93 (51.61)                          | F=3.760 (df 1)            | 0.054   |
| Months Since Provider Took HealthChange®                                           | 11.87 (19.86)                                                     | 19.65 (26.73)                          | F=2.546 (df 1)            | 0.113   |
| % Patients with Female Gender                                                      | 59.6%                                                             | 54.0%                                  | $\chi^2=0.666$ (df 1)     | 0.414   |
| % Providers took HealthChange®                                                     | 39.2%                                                             | 42.6%                                  | $\chi^2=0.474$ (df 2)     | 0.789   |
| Where in Facility<br>Open Area<br>Private Area or<br>Other                         | 49.1%<br>50.9%                                                    | 37.5%<br>62.5%                         | $\chi^2= 2.780$ (df 1)    | 0.095   |
| Marital Status<br>Married (incl<br>common law)<br>Not, or No Longer,<br>Married    | 190 (71.2%)<br>77 (28.8%)                                         | 43 (65.2%)<br>23 (34.8%)               | $\chi^2=0.910$ (df 1)     | 0.34    |
| Education<br>High school<br>diploma or less<br>Any post-<br>secondary<br>education | 72 (27.0%)<br>195 (73.0%)                                         | 23 (34.8%)<br>43 (65.2%)               | $\chi^2=1.612$ (df 1)     | 0.204   |
| Employment<br>Employed<br>Unemployed<br>Retired                                    | 118 (44.2%)<br>46 (17.2%)<br>103 (38.6%)                          | 23 (34.3%)<br>15 (22.4%)<br>29 (43.3%) | $\chi^2=2.316$ (df 2)     | 0.314   |
| Income<br>Less than \$59999                                                        | 80 (30.7%)                                                        | 25 (40.3%)                             | $\chi^2=2.458$ (df 3)     | 0.483   |

|                      |             |            |                       |       |
|----------------------|-------------|------------|-----------------------|-------|
| \$60000 to 99999     | 63 (24.1%)  | 11 (17.7%) |                       |       |
| \$100000 or More     | 64 (24.5%)  | 14 (22.6%) |                       |       |
| Prefer not to answer | 54 (20.7%)  | 12 (19.4%) |                       |       |
| Provider Discipline  |             |            | $\chi^2=13.79$ (df 2) | 0.001 |
| Physiotherapy        | 192 (82.8%) | 39 (62.9%) |                       |       |
| Occupational Therapy | 34 (14.7%)  | 22 (35.5%) |                       |       |
| Other                | 6 (2.6%)    | 1 (1.6%)   |                       |       |

**Table 7.** Clinically Relevant Differences Between Whether Patient Set a Goal or Not During Care and Other Variables

Finally, the mean (SD) overall WatLX™ rating of patient experience was 8.97 (1.39), where 10 was the highest rating. Item mean (SD) ratings ranged from 5.65 (1.35) to 6.79 (0.579) (7 was highest rating). Figure 6 demonstrates the distribution of responses along the 7-point Likert scale for these 10 items. The item with the greatest use of not applicable was having chosen family or friend given information that they needed about the patient's care, which suggests this question may be relevant for many patients. The lowest rated items were for achieving treatment goals and controlling physical pain as much as possible. The highest rated items were for being treated with courtesy, feeling safe during treatment activities and would recommend to others.

The mean (SD) overall rehabilitation experience when patients' experienced high-quality SDM experiences was 9.07 (1.57), and was not different from the experience of participants who reported "not high-quality" SDM (8.94 (1.41),  $p=0.735$ ). Similarly, patient perceptions of a goal being set was not associated with patients' overall rehabilitation experience rating (9.03 (1.25) vs. 8.72 (1.95),  $p=0.227$ ).

## Discussion

These findings correspond with current literature but also provide a foundation for expansion [15, 25–28]. Previous literature reviews suggested very negative and limited SDM experiences in rehabilitation [15]. A narrative synthesis (n=15 studies) revealed that in-patient rehabilitation goal-setting did not permit patient input, was overly-controlled by staff, was challenging for time and patient-load reasons, and involved parties lacking SDM knowledge [15]. While our findings reveal much room to improve SDM quality and consistency in community rehabilitation, our data suggest that many patients and providers rate SDM-quality high even though some providers do take a leading (or controlling) role. For patients, the lowest ratings relate to the recognition of

1  
2  
3 patient preferences, which is at the heart of SDM. Providers were more critical than  
4 patients on SDM experiences, which suggests a receptivity to strategies to improve SDM.

5  
6 While the literature in rehabilitation often conflates goal-setting and SDM [15, 29],  
7 our findings suggest that may be inappropriate. Patient-participant perceptions of  
8 whether goals were set, and the connection (or not) between set goals and patient lives,  
9 is concerning. Nearly 1 in 5 patients in this provincial health-system are not setting  
10 goals for their rehabilitation care. If goal functionality is modestly measured to include  
11 general and specific connections to patients' everyday activities, roles and  
12 responsibilities, then only every other patient is setting a goal in language that is  
13 meaningful to them. Patient engagement and SDM are strategies to support movement  
14 towards meaningful goal-setting, which itself supports patients in working on treatment  
15 plans that motivate them and move them in the direction that they would like to go [30].

16  
17 Our findings suggest actionable items that could promote more experiences of high  
18 quality SDM in community rehabilitation, and possibly goal-setting. First, provider  
19 training, especially person-centred behaviour change training (HealthChange®), are  
20 associated with better-quality SDM encounters ( $p=0.086$ ). Most providers felt that  
21 HealthChange® influenced their patient interactions and site processes to some degree  
22 (76.9% and 53.8%, respectively). This identifies an alternative, more impactful training  
23 process versus the train-the-trainer SDM-development activities completed previously  
24 in Europe that did not yield increased patient involvement in decision-making [26, 28].

25  
26 Second, providers should facilitate the feeling of privacy during appointments,  
27 whether using available private rooms or a privacy curtain as both options significantly  
28 improved SDM experiences. The latter would be particularly useful in urban settings,  
29 where private rooms are less available and there are frequently other people in the  
30 rehabilitation area.

31  
32 Third, most non-modifiable patient characteristics (including age) were not  
33 significantly associated with the quality of SDM or goal-setting. Only total family income  
34 was associated with SDM experience. These findings corroborate the literature that SDM  
35 is a skill that can be taught and not an innate trait of an individual [31]. Total family  
36 income is a marker of socioeconomic status and relative vulnerability; it is not about  
37 capacity or education because education level was not associated with SDM experience.  
38 Further strategies and training are required to support providers and organizations in  
39  
40  
41  
42  
43  
44  
45  
46  
47  
48  
49  
50  
51  
52  
53  
54  
55  
56  
57  
58  
59  
60

1  
2  
3 identifying, then approaching and empowering, more economically-vulnerable patients  
4 in SDM.  
5

6 Finally, as different disciplines seem to have varying success with SDM, there may  
7 be an opportunity to promote greater transdisciplinary learning, practice and sharing  
8 in community-rehabilitation sites. This would support the development of a community  
9 of practice, which would also sustain learnings from person-centred training (e.g.  
10 HealthChange®) through ongoing discussion.  
11  
12

13 Based on participant demographics, these findings confidently apply to diverse  
14 community rehabilitation settings across Alberta. The patient population was fairly  
15 distributed amongst different family incomes, insurance access, and employment. These  
16 findings were not as highly represented from patients originating from rural  
17 communities, ethnocultural communities, and less-educated populations (i.e. less than  
18 high school).  
19  
20  
21  
22  
23

24 Participating providers were mostly fairly experienced. The findings apply to hospital-  
25 based and community-based settings. These findings may not apply to new-graduates  
26 or providers trained outside of Canada. Most providers represented two rehabilitation  
27 disciplines: occupational therapy and physiotherapy. While several other disciplines  
28 were present to a lesser degree, it may be useful to examine these research questions  
29 where these other disciplines are more populous.  
30  
31  
32  
33  
34

### 35 Limitations

36 We recognize several study limitations. First, we tried to minimize recall (memory)  
37 bias by placing a 24-hour limit on participants to complete surveys, so the appointment  
38 is fresh in their minds. We recognize that patients may not have completed the survey  
39 on-time with take-home packages since it was outside the supervision of researchers  
40 and recruiters.  
41  
42  
43  
44

45 Second, we tried to lessen the risk of loss at 3-month follow-up using several tactics  
46 from Dillman et al. [32]. These tactics included allowing participant preference to dictate  
47 the form of follow-up (email or paper); using a mix of email and phone reminders both  
48 pre- and post- T1. We lost about 40% of patients at T1. Demographically, the patient-  
49 participants at recruitment and follow-up did not differ significantly on any patient  
50 characteristics.  
51  
52  
53  
54  
55  
56  
57  
58  
59  
60

1  
2  
3 Third, Phase-1 learnings suggested that there may be a selection bias and non-  
4 response bias. Patients with extreme experiences (either good or bad) could have been  
5 more interested in participation, which could differ significantly from the general  
6 patient-population experience. It was unlikely, given the difficulty in patient recruitment  
7 generally, to recruit non-responders to participate in a non-responder survey. This  
8 study prioritized significant recruitment using convenience sampling to lessen the  
9 influence of these biases.  
10  
11  
12  
13

14 Fourth, there may have been a Hawthorne effect on providers wherein their  
15 knowledge of a study assessing their communication altered their communicative  
16 behaviours. A previous feasibility study demonstrated that rehabilitation professionals  
17 were accustomed to being observed during practice given their own training, the  
18 multidisciplinary players, and trainee presence at many sites. For patients, they would  
19 generally not know of the study until after their appointment, so their actions likely  
20 would not be influenced by reactive effects.  
21  
22  
23  
24  
25

26 Fifth, there may have been acquiescence and social desirability bias whereby  
27 participants frequently endorsed positive statements and where participants wished to  
28 present themselves at their best, including being fully engaged in SDM. Historically, this  
29 has been shown to have a small but pervasive effect. To minimize this, we aimed to  
30 recruit until a high survey sample size and diversity of population were recruited.  
31  
32  
33

34 Sixth, for feasibility, survey tools were used differently from their original validation  
35 process. The WatLX™ was completed 3-months after recruitment which corresponded  
36 differently across patients' rehabilitation journey; not all patients completed the  
37 WatLX™ within the two weeks after care ended. Most patients stated at recruitment that  
38 they were neither at the first nor last appointment. Only 4.4% of patients were on their  
39 last appointment at recruitment. The most egregious difference in WatLX™ completion  
40 (i.e. 3 months after last appointment) was only possible for a rarity of participants. The  
41 gains made in data collection compared to the feasibility study suggest that this  
42 compromise in data collection was worthwhile. The resonance and corroboration of  
43 findings across methods and studies confirms that the tools remained valid.  
44  
45  
46  
47  
48  
49

50 Seventh, we cannot guarantee that ASK-MI survey completion was based on  
51 assessments of the recruitment-date appointment only rather than on the totality of  
52 experience with that patient, provider or clinic. Many participating patient comments in  
53 the ASK-MI referred to the entirety of their rehabilitation care. Patients may have felt  
54  
55  
56  
57  
58  
59  
60



1  
2  
3 that there was commonality or consistency in interactions across appointments, so it  
4 was then appropriate to assess SDM across the rehabilitation journey. Further research  
5 is required to understand when and how patients judge SDM in rehabilitation along the  
6 different points in the rehabilitation journey.  
7  
8  
9

## 10 11 **Conclusions**

12 While we recognize several study limitations, we believe our forethought and  
13 planning to consider and address these limits ensures the methodological rigour of this  
14 study. This study complements our qualitative findings,[16], that SDM is complex not  
15 monolithic in community rehabilitation. There is room to improve upon patient and  
16 provider practices of SDM and collaborative goal-setting in these settings, and we offer  
17 strategies such as further person-centred training, enhancing privacy during  
18 appointments, and building transdisciplinary communities of practice around how  
19 rehabilitation providers can approach SDM with patients. Further research is required  
20 to determine whether novel scoring of the ASK-MI influences SDM prevalence, which  
21 tactics to identify and redress the vulnerability of low-family-income patients are useful  
22 to advance SDM for this vulnerable group. This study suggests that SDM experience  
23 and goal-setting are not associated with longitudinal perceptions of rehabilitation  
24 experience and treatment goals being met, using a tool with high ceiling effects. We  
25 recommend more research into strategies that advance highly-functional goal-setting  
26 with patients, and to re-examine these relationships with tools without (or with less  
27 prominent) ceiling effects.  
28  
29  
30  
31  
32  
33  
34  
35  
36  
37  
38  
39  
40  
41  
42  
43  
44  
45  
46  
47  
48  
49  
50  
51  
52  
53  
54  
55  
56  
57  
58  
59  
60

### **Acknowledgements**

We acknowledge our participants, both patient and provider, at the participating sites. We acknowledge the site managers, therapy assistants, clerks and non-participating providers at each site who were pivotal to recruitment and supporting the study more broadly. We particularly thank Jean Miller and Sylvia Teare, who are Patient and Community Engagement Researchers and who acted as patient consultants on this project. We particularly thank the provincial and regional leadership at Alberta Health Services, including Lisa Warner and Elaine Finseth, who were (and continue to be) champions of this work. We also acknowledge Momentum Health, and their leadership Shaun Macauley, who were pivotal to the realization of this work.

### **Author Contributions:**

KPM helped contribute to the study's conceptualization and design. KPM implemented the study methodology, managed resources, and developed all manuscript drafts.

KO helped contribute to the study's conceptualization and provided ongoing supervision in close collaboration with the other senior authors (SV, TW) regarding its methods, conduct, analysis, and manuscript development.

KC helped contribute to the study's operationalization; provided ongoing support on conduct, analysis, and manuscript development; and, reviewed and edited this manuscript.

SV helped contribute to the study's conceptualization and provided ongoing supervision in close collaboration with the other senior authors (KO, TW) regarding its methods, conduct, analysis, and manuscript development.

TW helped contribute to the study's conceptualization and provided ongoing supervision in close collaboration with the other senior authors (KO, SV) regarding its methods, conduct, analysis, and manuscript development.

### **Competing Interests: none**

**Funding Support:**

This work was supported by the Canadian Institutes for Health Research Health System Impact Fellowship [Code 201705HI7-388576-170744, 2017]. Supplemental funding was provided by the Strategic Clinical Networks™ and Research Challenge portfolios at Alberta Health Services.

**Ethics Approval:** Research ethics board approval was secured for this study.

**Provenance, Peer Review:** Not commissioned; externally peer reviewed.

**Data Sharing Statement:** Availability of data and materials. For the data wherein patients consented to future data sharing, the de-identified data is currently being prepared for deposit in a secure data repository for data sharing upon application.

**Patient Consent:** Patient-participants provided consent to share aggregated data in peer-reviewed publications.

**References**

- [1] Scholl I, Loon MK, Sepucha K, et al. Measurement of shared decision making – a review of instruments. *Z Evid Fortbild Qual Gesundheitswes* 2011; 105: 313–324.
- [2] Scholl I, Kriston L, Dirmaier J, et al. Comparing the nine-item Shared Decision-Making Questionnaire to the OPTION Scale - an attempt to establish convergent validity. *Heal Expect* 2015; 18: 137–150.
- [3] Barr PJ, Elwyn G. Measurement challenges in shared decision making: putting the ‘patient’ in patient-reported measures. *Heal Expect* 2016; 19: 993–1001.
- [4] Aretha MC, Aretha MC. The Future of Patient Decision Aids Post-Affordable Care Act Implementation: Whose Decision Is It Anyway?
- [5] Pope TM. Certified Patient Decision Aids : Solving Persistent Problems with Informed Consent Law. *J Law Med Ethics* 2017; 45: 12–40.
- [6] Yiu V, Gordon D, Woods S, et al. *The Patient First*. Edmonton, AB <https://www.albertahealthservices.ca/assets/info/pf/first/if-pf-1-pf-strategy.pdf> (2015).

- 1  
2  
3 [7] Alberta Health Services. *Alberta Health Services 2016-17 Annual Report*.  
4 Edmonton,  
5  
6 ABhttp://www.albertahealthservices.ca/assets/about/publications/ahs-pub-  
7 2016-2017-annual-report.pdf (2017).  
8  
9 [8] Canadian Institutes of Health Research. Strategy for Patient-Oriented Research  
10 (SPOR). Epub ahead of print 2019. DOI: 1.  
11  
12 [9] O'Connor AM, Wennberg JE, Legare F, et al. Toward the 'tipping point': Decision  
13 aids and informed patient choice. *Health Aff* 2007; 26: 716–725.  
14  
15 [10] Légaré F, Witteman HO. Shared decision making: Examining key elements and  
16 barriers to adoption into routine clinical practice. *Health Aff* 2013; 32: 276–284.  
17  
18 [11] Bouniols N, Leclère B, Moret L. Evaluating the quality of shared decision making  
19 during the patient-carer encounter: a systematic review of tools. *BMC Res Notes*  
20 2016; 9: 382.  
21  
22 [12] Légaré F, Moher D, Elwyn G, et al. Instruments to assess the perception of  
23 physicians in the decision-making process of specific clinical encounters: a  
24 systematic review. *BMC Med Inform Decis Mak* 2007; 7: 30.  
25  
26 [13] Kunneman M, Gionfriddo MR, Toloza FJK, et al. Humanistic communication in  
27 the evaluation of shared decision making: A systematic review. *Patient Educ*  
28 *Couns* 2019; 102: 452–466.  
29  
30 [14] Olson K, Manca D, O'Beirne M, et al. Development of the Alberta Shared  
31 Decision-Making Measurement Instrument (ASK-MI). *Under Rev*.  
32  
33 [15] Rose A, Rosewilliam S, Soundy A. Shared decision making within goal setting in  
34 rehabilitation settings: A systematic review. *Patient Educ Couns* 2017; 100: 65–  
35 75.  
36  
37 [16] Manhas KP, Olson K, Churchill K, et al. Shared Decision-Making Experiences in  
38 Community Rehabilitation in Alberta, Canada.  
39  
40 [17] Speziale HJS, Carpenter DR. *Qualitative Research in Nursing: Advancing the*  
41 *Humanistic Imperative*. Lippincott. Philadelphia, PA, 2007.  
42  
43 [18] Spradley J. *The Ethnographic Interview*. Belmont, CA: Wadsworth, 1979.  
44  
45 [19] Cruz E, Higginbottom G. The use of focused ethnography in nursing research.  
46 *Nurs Res* 2013; 20: 36–43.  
47  
48 [20] Higginbottom G, Pillay JJ, Boadu NY. Guidance on Performing Focused  
49 Ethnographies with an Emphasis on Healthcare Research. *Qual Rep* 2013; 18:  
50  
51  
52  
53  
54  
55  
56  
57  
58  
59  
60

- 1  
2  
3 1–6.
- 4  
5 [21] McMurray J, McNeil H, Elliott J, et al. WatLX: A system-wide patient experience  
6 measure for rehabilitation. In: *Canadian Association for Health Systems and*  
7 *Policy Research 2016 Conference: A Learning Healthcare System*. Toronto, ON,  
8 2016.
- 9  
10  
11 [22] Howell DC. The analysis of missing data. In: Outhwaite W, Turner S (eds)  
12 *Handbook of Social Science Methodology*. London, UK:  
13 SAGE [http://www.uvm.edu/~dhowell/StatPages/Missing\\_Data/MissingDataFin](http://www.uvm.edu/~dhowell/StatPages/Missing_Data/MissingDataFinal.pdf)  
14 [al.pdf](http://www.uvm.edu/~dhowell/StatPages/Missing_Data/MissingDataFinal.pdf) (2008).
- 15  
16  
17 [23] Gale J, Skouteris H. Health coaching: Facilitating health behaviour change for  
18 chronic condition prevention and self-management. In: Caltabiano M,  
19 Ricciardelli L (eds) *Handbook of Applied Topics in Health Psychology*. Wiley-  
20 Blackwell, 2013.
- 21  
22  
23 [24] Devet HCW, Terwee CB, Mokkink LB, et al. *Measurement in Medicine*.  
24 Cambridge, UK: Cambridge University Press, 2011.
- 25  
26  
27 [25] Koerner M, Wirtz M, Michaelis M, et al. A multicentre cluster-randomized  
28 controlled study to evaluate a train-the-trainer programme for implementing  
29 internal and external participation in medical rehabilitation. *Clin Rehabil* 2014;  
30 28: 20–35.
- 31  
32  
33 [26] Koerner M, Michaelis M, Ehrhardt H, Steger AK, Zerpies E, Bengel J WM. A  
34 multicentre cluster-randomized controlled study to evaluate a train-the-trainer  
35 programme for implementing internal and external participation in medical  
36 rehabilitation. *Clinical rehabilitation* 2014; 28: 20.
- 37  
38  
39 [27] Körner M, Ehrhardt H, Steger A-K. Designing an interprofessional training  
40 program for shared decision making. *J Interprof Care* 2013; 27: 146–154.
- 41  
42  
43 [28] Körner M, Ehrhardt H, Steger AK, et al. Interprofessional SDM train-the-trainer  
44 program ‘Fit for SDM’: Provider satisfaction and impact on participation. *Patient*  
45 *Educ Couns* 2012; 89: 122–128.
- 46  
47  
48 [29] Pritchard-Wiart L, Thompson-Hodgetts S, McKillop AB. A review of goal setting  
49 theories relevant to goal setting in paediatric rehabilitation. *Clin Rehabil*. Epub  
50 ahead of print 2019. DOI: 10.1177/0269215519846220.
- 51  
52  
53 [30] AHS Provincial Rehabilitation Forum. *Rehabilitation Strategic Plan 2016-2019*.  
54 Edmonton, AB <https://www.alberta-tr.org/media/46444/ahs-rehabilitation->  
55

1  
2  
3 strategic-plan-2016.pdf (2016).

4  
5 [31] Légaré F, Thompson-Leduc P. Twelve myths about shared decision making.  
6 *Patient Educ Couns* 2014; 96: 281–286.

7  
8 [32] Dillman D, Smyth J, Christian L. *Internet, mail and mixed-mode surveys: The*  
9 *tailored design method*. Hoboken, NJ: John Wiley & Sons, Ltd, 2009.

10  
11  
12  
13  
14  
15  
16  
17  
18  
19  
20  
21  
22  
23  
24  
25  
26  
27  
28  
29  
30  
31  
32  
33  
34  
35  
36  
37  
38  
39  
40  
41  
42  
43  
44  
45  
46  
47  
48  
49  
50  
51  
52  
53  
54  
55  
56  
57  
58  
59  
60

For peer review only

1  
2  
3  
4  
5  
6  
7  
8  
9  
10  
11  
12  
13  
14  
15  
16  
17  
18  
19  
20  
21  
22  
23  
24  
25  
26  
27  
28  
29  
30  
31  
32  
33  
34  
35  
36  
37  
38  
39  
40  
41  
42  
43  
44  
45  
46  
47  
48  
49  
50  
51  
52  
53  
54  
55  
56  
57  
58  
59  
60

Figure 1  
215x279mm (200 x 200 DPI)

1  
2  
3  
4  
5  
6  
7  
8  
9  
10  
11  
12  
13  
14  
15  
16  
17  
18  
19  
20  
21  
22  
23  
24  
25  
26  
27  
28  
29  
30  
31  
32  
33  
34  
35  
36  
37  
38  
39  
40  
41  
42  
43  
44  
45  
46  
47  
48  
49  
50  
51  
52  
53  
54  
55  
56  
57  
58  
59  
60

**Figure 2.** Patient Responses on the Six ASK-MI Items on SDM Experience

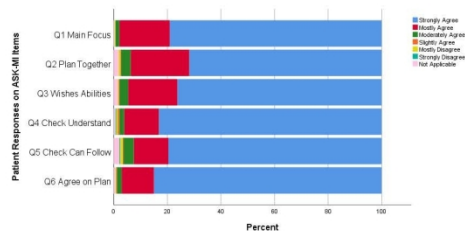

Figure 2

215x279mm (177 x 201 DPI)



1  
2  
3  
4  
5  
6  
7  
8  
9  
10  
11  
12  
13  
14  
15  
16  
17  
18  
19  
20  
21  
22  
23  
24  
25  
26  
27  
28  
29  
30  
31  
32  
33  
34  
35  
36  
37  
38  
39  
40  
41  
42  
43  
44  
45  
46  
47  
48  
49  
50  
51  
52  
53  
54  
55  
56  
57  
58  
59  
60

Figure 3. Provider Responses on the Six ASK-MI Items on SDM Experience

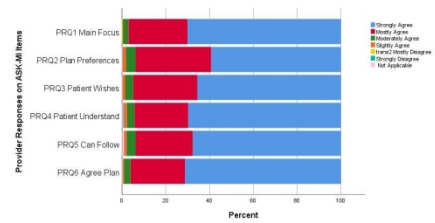

Figure 3

215x279mm (165 x 219 DPI)

1  
2  
3  
4  
5  
6  
7  
8  
9  
10  
11  
12  
13  
14  
15  
16  
17  
18  
19  
20  
21  
22  
23  
24  
25  
26  
27  
28  
29  
30  
31  
32  
33  
34  
35  
36  
37  
38  
39  
40  
41  
42  
43  
44  
45  
46  
47  
48  
49  
50  
51  
52  
53  
54  
55  
56  
57  
58  
59  
60

**Figure 4.** Patient Perceptions of Goal Setting Occurrence

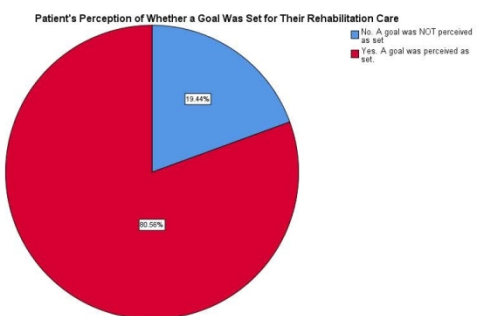

Figure 4

215x279mm (168 x 172 DPI)

1  
2  
3  
4  
5  
6  
7  
8  
9  
10  
11  
12  
13  
14  
15  
16  
17  
18  
19  
20  
21  
22  
23  
24  
25  
26  
27  
28  
29  
30  
31  
32  
33  
34  
35  
36  
37  
38  
39  
40  
41  
42  
43  
44  
45  
46  
47  
48  
49  
50  
51  
52  
53  
54  
55  
56  
57  
58  
59  
60

Figure 5. Level of Functionality of Patient-Stated Goals

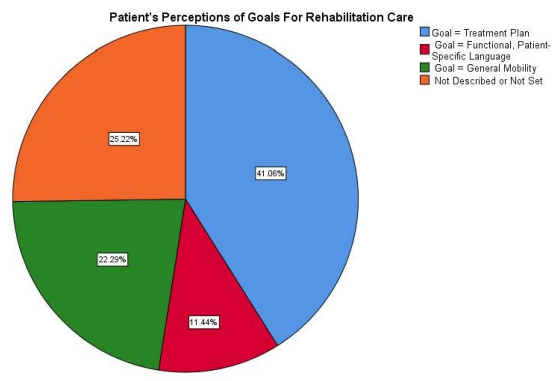

Figure 5

215x279mm (146 x 146 DPI)

1  
2  
3  
4  
5  
6  
7  
8  
9  
10  
11  
12  
13  
14  
15  
16  
17  
18  
19  
20  
21  
22  
23  
24  
25  
26  
27  
28  
29  
30  
31  
32  
33  
34  
35  
36  
37  
38  
39  
40  
41  
42  
43  
44  
45  
46  
47  
48  
49  
50  
51  
52  
53  
54  
55  
56  
57  
58  
59  
60

**Figure 6.** Patient Ratings of Experience on Individual WatLX™ Items

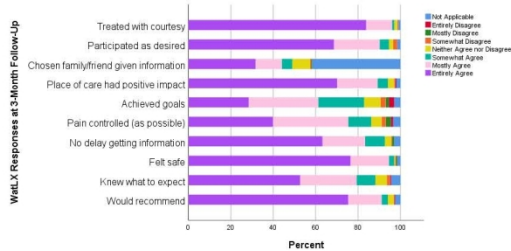

Figure 6

215x279mm (153 x 182 DPI)

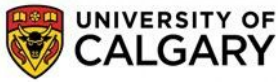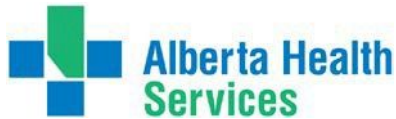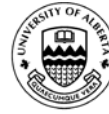

UNIVERSITY OF ALBERTA

## COMMUNITY REHABILITATION PATIENT – Information and Consent Form

**Title of Research Study: ASK-MI Community Rehabilitation PHASE 2 - Measuring the Impact of Shared Decision-making in Community Rehabilitation in Alberta**

### Lead Investigators:

Tracy Wasylak, Alberta Health Services & University of Calgary, 403-943-1256  
Kiran Manhas, University of Alberta & Alberta Health Services, 403-478-8598

This consent form is only part of the informed consent process. It should give you the basic idea of what the research is about and what taking part will involve. If you want more detail, please ask. Please read this carefully and ensure you understand any add-on information. This copy is for your records; we will imply your consent to the survey study if you send this form back.

### WHAT IS THE PURPOSE OF THE STUDY?

This study is looking at what promotes or hinders shared decision-making between patients and providers in community rehabilitation (rehab). Shared decision-making involves using evidence and patient preferences to make healthcare decisions.

### WHAT WOULD I HAVE TO DO?

We are asking patients and providers at this site to take part in this study:

- You will be asked to complete a set of surveys at a two different times. The questions will focus on you and your experiences with community rehab and making decisions. Each individual survey is 1 to 2 pages long.

| Time-point  | # of Surveys | Time Required | Format                                                                                                                                                                                                                                                                                                      |
|-------------|--------------|---------------|-------------------------------------------------------------------------------------------------------------------------------------------------------------------------------------------------------------------------------------------------------------------------------------------------------------|
| Today       | 4            | 5-10 min      | <ul style="list-style-type: none"> <li>Take-home paper-based surveys</li> <li>Base on today's appointment</li> <li>Return by mail</li> </ul>                                                                                                                                                                |
| In 3 months | 3            | 5-10 min      | <ul style="list-style-type: none"> <li>By email or mail</li> <li>You will get a phone call reminder 1-week before the survey is sent to you.</li> <li>You will have two weeks to complete and return it.</li> <li>You may receive email or phone reminders if you have not completed the survey.</li> </ul> |

- You agree that your rehab provider will complete a survey about shared decision-making based on your appointment. The provider may also talk about your appointments in an interview.
- You MAY be invited to take part in an interview (30-60 minutes) to discuss your experience with shared decision-making. The interview could be in-person, phone or Skype, based on what you prefer.

### WHAT ARE THE RISKS AND BENEFITS?

There are no physical risks to study participation. The study has no to minimal risks. Some people may find it upsetting to talk about their experience. If you feel upset, some resources are available for free including:

- In-person: AHS Mental Health Walk-in Service (located at South Calgary Health Centre 31 Sunpark Plaza SE, 403-943-9374).

- Telephone: AB Mental Health HelpLine 1-877-303-2642
- Online: The Distress Centre website that offers online resources (incl. confidential chat option) ([www.distresscentre.com](http://www.distresscentre.com)).

### **DO I HAVE TO PARTICIPATE?**

Your participation is completely voluntary. You may withdraw at any time with no effect on your care or job. You can refuse to answer any question(s). If you withdraw, you may choose what happens with the data you contributed so far unless the study data collection period is done. There may or may not be a direct benefit to you. The information we get from this study may help us to provide better care experiences, through better shared decision-making, in the future for patients visiting community rehab.

### **WILL MY RECORDS BE KEPT PRIVATE?**

All data collected will be kept strictly confidential. Only the study team will see it (not your providers, patients or employers). All study documents will be kept in a locked cabinet for a minimum of 5 years prior to being destroyed. We will store interview and survey data on password-protected, encrypted AHS computer(s) and an approved research data repository (REDCAP). No information that contains personal information will be released to anyone else without a court order, so we will maintain your confidentiality unless legally required not to. We will use a study ID, not your name, to link your data together. Data from all study participants from this clinic will be summarized and all identifying-information removed, before it is shared with stakeholders (e.g. clinic and managerial staff).

Quotes from interviews may be used in research reports to help explain study results. Names and identifying information will not be included. Site-level data may be shared within AHS to support continued learning and improvement. We will submit a final report for publication in a peer-reviewed journal. At study end, where you consent, de-identified quantitative data may be shared with a secure research data repository for future research by approved researchers.

By signing this consent form you are agree to the study team to collect, use and disclose information about you including personally identifiable information, but this information will remain confidential and will not be identifiable to you.

### **WHAT IF SOMETHING NEW COMES UP DURING THE STUDY THAT AFFECTS PARTICIPATION IN THE RESEARCH?**

We will let you know of any significant changes that could affect your decision to participate. You can withdraw from the study at any time, for any reason, with no explanation.

### **WILL I BE PAID FOR PARTICIPATING?**

No, you will not be paid for taking part. But **everyone who completes the three month surveys will be eligible for a draw at the end of the study to win a FitBit**. This draw is to recognize your time and contributions. We will pay parking costs during study interviews.

The University of Calgary Conjoint Health Research Ethics Board has approved this research study. This consent form has been given to you to keep for your records and reference. If you have further questions concerning matters related to this research, please contact: **Ms. Tracy Wasylak (403) 943-1256 OR Dr. Kiran Pohar Manhas (403) 478-8598**. If you have any questions concerning your rights as a possible participant in this research, please contact the Chair, Conjoint Health Research Ethics Board, University of Calgary at 403-220-7990.

In no way does this waive your legal rights nor release the investigators or involved institutions from their legal and professional responsibilities. You are free to withdraw from the study at any time without jeopardizing your health care.

# Reporting checklist for cohort study.

Based on the STROBE cohort guidelines.

## Instructions to authors

Complete this checklist by entering the page numbers from your manuscript where readers will find each of the items listed below.

Your article may not currently address all the items on the checklist. Please modify your text to include the missing information. If you are certain that an item does not apply, please write "n/a" and provide a short explanation.

Upload your completed checklist as an extra file when you submit to a journal.

In your methods section, say that you used the STROBE cohort reporting guidelines, and cite them as:

von Elm E, Altman DG, Egger M, Pocock SJ, Gøtzsche PC, Vandenbroucke JP. The Strengthening of Reporting of Observational Studies in Epidemiology (STROBE) Statement: guidelines for reporting observational studies.

|                           |                     |                                                                                                 | Page Number |
|---------------------------|---------------------|-------------------------------------------------------------------------------------------------|-------------|
| <b>Title and abstract</b> |                     |                                                                                                 |             |
| Title                     | <a href="#">#1a</a> | Indicate the study's design with a commonly used term in the title or the abstract              | 1           |
| Abstract                  | <a href="#">#1b</a> | Provide in the abstract an informative and balanced summary of what was done and what was found | 1           |
| <b>Introduction</b>       |                     |                                                                                                 |             |
| Background / rationale    | <a href="#">#2</a>  | Explain the scientific background and rationale for the investigation being reported            | 3           |
| Objectives                | <a href="#">#3</a>  | State specific objectives, including any prespecified hypotheses                                | 4           |
| <b>Methods</b>            |                     |                                                                                                 |             |

|    |                      |                      |                                                                 |     |
|----|----------------------|----------------------|-----------------------------------------------------------------|-----|
| 1  | Study design         | <a href="#">#4</a>   | Present key elements of study design early in the paper         | 4   |
| 2  |                      |                      |                                                                 |     |
| 3  | Setting              | <a href="#">#5</a>   | Describe the setting, locations, and relevant dates, including  | 5   |
| 4  |                      |                      | periods of recruitment, exposure, follow-up, and data           |     |
| 5  |                      |                      | collection                                                      |     |
| 6  |                      |                      |                                                                 |     |
| 7  |                      |                      |                                                                 |     |
| 8  | Eligibility criteria | <a href="#">#6a</a>  | Give the eligibility criteria, and the sources and methods of   | 5   |
| 9  |                      |                      | selection of participants. Describe methods of follow-up.       |     |
| 10 |                      |                      |                                                                 |     |
| 11 | Eligibility criteria | <a href="#">#6b</a>  | For matched studies, give matching criteria and number of       | n/a |
| 12 |                      |                      | exposed and unexposed                                           |     |
| 13 |                      |                      |                                                                 |     |
| 14 |                      |                      |                                                                 |     |
| 15 |                      |                      |                                                                 |     |
| 16 | Variables            | <a href="#">#7</a>   | Clearly define all outcomes, exposures, predictors, potential   | 5   |
| 17 |                      |                      | confounders, and effect modifiers. Give diagnostic criteria, if |     |
| 18 |                      |                      | applicable                                                      |     |
| 19 |                      |                      |                                                                 |     |
| 20 |                      |                      |                                                                 |     |
| 21 | Data sources /       | <a href="#">#8</a>   | For each variable of interest give sources of data and details  | 5   |
| 22 | measurement          |                      | of methods of assessment (measurement). Describe                |     |
| 23 |                      |                      | comparability of assessment methods if there is more than       |     |
| 24 |                      |                      | one group. Give information separately for for exposed and      |     |
| 25 |                      |                      | unexposed groups if applicable.                                 |     |
| 26 |                      |                      |                                                                 |     |
| 27 |                      |                      |                                                                 |     |
| 28 |                      |                      |                                                                 |     |
| 29 |                      |                      |                                                                 |     |
| 30 | Bias                 | <a href="#">#9</a>   | Describe any efforts to address potential sources of bias       | 13  |
| 31 |                      |                      |                                                                 |     |
| 32 | Study size           | <a href="#">#10</a>  | Explain how the study size was arrived at                       | 5   |
| 33 |                      |                      |                                                                 |     |
| 34 | Quantitative         | <a href="#">#11</a>  | Explain how quantitative variables were handled in the          | 7   |
| 35 | variables            |                      | analyses. If applicable, describe which groupings were          |     |
| 36 |                      |                      | chosen, and why                                                 |     |
| 37 |                      |                      |                                                                 |     |
| 38 |                      |                      |                                                                 |     |
| 39 |                      |                      |                                                                 |     |
| 40 | Statistical          | <a href="#">#12a</a> | Describe all statistical methods, including those used to       | 7   |
| 41 | methods              |                      | control for confounding                                         |     |
| 42 |                      |                      |                                                                 |     |
| 43 | Statistical          | <a href="#">#12b</a> | Describe any methods used to examine subgroups and              | 7   |
| 44 | methods              |                      | interactions                                                    |     |
| 45 |                      |                      |                                                                 |     |
| 46 |                      |                      |                                                                 |     |
| 47 | Statistical          | <a href="#">#12c</a> | Explain how missing data were addressed                         | 7   |
| 48 | methods              |                      |                                                                 |     |
| 49 |                      |                      |                                                                 |     |
| 50 |                      |                      |                                                                 |     |
| 51 | Statistical          | <a href="#">#12d</a> | If applicable, explain how loss to follow-up was addressed      | 7   |
| 52 | methods              |                      |                                                                 |     |
| 53 |                      |                      |                                                                 |     |
| 54 |                      |                      |                                                                 |     |
| 55 | Statistical          | <a href="#">#12e</a> | Describe any sensitivity analyses                               | n/a |
| 56 | methods              |                      |                                                                 |     |
| 57 |                      |                      |                                                                 |     |
| 58 |                      |                      |                                                                 |     |
| 59 |                      |                      |                                                                 |     |
| 60 |                      |                      |                                                                 |     |



## Results

|    |                   |                      |                                                                       |
|----|-------------------|----------------------|-----------------------------------------------------------------------|
| 1  |                   |                      |                                                                       |
| 2  |                   |                      |                                                                       |
| 3  | Participants      | <a href="#">#13a</a> | Report numbers of individuals at each stage of study—eg 7             |
| 4  |                   |                      |                                                                       |
| 5  |                   |                      | numbers potentially eligible, examined for eligibility,               |
| 6  |                   |                      | confirmed eligible, included in the study, completing follow-         |
| 7  |                   |                      | up, and analysed. Give information separately for for                 |
| 8  |                   |                      | exposed and unexposed groups if applicable.                           |
| 9  |                   |                      |                                                                       |
| 10 |                   |                      |                                                                       |
| 11 | Participants      | <a href="#">#13b</a> | Give reasons for non-participation at each stage 7                    |
| 12 |                   |                      |                                                                       |
| 13 | Participants      | <a href="#">#13c</a> | Consider use of a flow diagram n/a                                    |
| 14 |                   |                      |                                                                       |
| 15 |                   |                      |                                                                       |
| 16 | Descriptive data  | <a href="#">#14a</a> | Give characteristics of study participants (eg demographic, 8         |
| 17 |                   |                      | clinical, social) and information on exposures and potential          |
| 18 |                   |                      | confounders. Give information separately for exposed and              |
| 19 |                   |                      | unexposed groups if applicable.                                       |
| 20 |                   |                      |                                                                       |
| 21 |                   |                      |                                                                       |
| 22 |                   |                      |                                                                       |
| 23 | Descriptive data  | <a href="#">#14b</a> | Indicate number of participants with missing data for each 8-11,      |
| 24 |                   |                      | variable of interest Tables                                           |
| 25 |                   |                      |                                                                       |
| 26 |                   |                      |                                                                       |
| 27 | Descriptive data  | <a href="#">#14c</a> | Summarise follow-up time (eg, average and total amount) 6             |
| 28 |                   |                      |                                                                       |
| 29 | Outcome data      | <a href="#">#15</a>  | Report numbers of outcome events or summary measures 8-11,            |
| 30 |                   |                      | over time. Give information separately for exposed and Tables         |
| 31 |                   |                      | unexposed groups if applicable.                                       |
| 32 |                   |                      |                                                                       |
| 33 |                   |                      |                                                                       |
| 34 | Main results      | <a href="#">#16a</a> | Give unadjusted estimates and, if applicable, confounder- 8-11,       |
| 35 |                   |                      | adjusted estimates and their precision (eg, 95% confidence Tables     |
| 36 |                   |                      | interval). Make clear which confounders were adjusted for             |
| 37 |                   |                      | and why they were included                                            |
| 38 |                   |                      |                                                                       |
| 39 |                   |                      |                                                                       |
| 40 |                   |                      |                                                                       |
| 41 | Main results      | <a href="#">#16b</a> | Report category boundaries when continuous variables were 8-11,       |
| 42 |                   |                      | categorized Tables                                                    |
| 43 |                   |                      |                                                                       |
| 44 |                   |                      |                                                                       |
| 45 | Main results      | <a href="#">#16c</a> | If relevant, consider translating estimates of relative risk into n/a |
| 46 |                   |                      | absolute risk for a meaningful time period                            |
| 47 |                   |                      |                                                                       |
| 48 |                   |                      |                                                                       |
| 49 | Other analyses    | <a href="#">#17</a>  | Report other analyses done—e.g., analyses of subgroups 7              |
| 50 |                   |                      | and interactions, and sensitivity analyses                            |
| 51 |                   |                      |                                                                       |
| 52 |                   |                      |                                                                       |
| 53 | <b>Discussion</b> |                      |                                                                       |
| 54 |                   |                      |                                                                       |
| 55 | Key results       | <a href="#">#18</a>  | Summarise key results with reference to study objectives 11-12        |
| 56 |                   |                      |                                                                       |
| 57 |                   |                      |                                                                       |
| 58 |                   |                      |                                                                       |
| 59 |                   |                      |                                                                       |
| 60 |                   |                      |                                                                       |

|    |                    |                     |                                                                |       |
|----|--------------------|---------------------|----------------------------------------------------------------|-------|
| 1  | Limitations        | <a href="#">#19</a> | Discuss limitations of the study, taking into account sources  | 13-14 |
| 2  |                    |                     | of potential bias or imprecision. Discuss both direction and   |       |
| 3  |                    |                     | magnitude of any potential bias.                               |       |
| 4  |                    |                     |                                                                |       |
| 5  |                    |                     |                                                                |       |
| 6  | Interpretation     | <a href="#">#20</a> | Give a cautious overall interpretation considering objectives, | 12-13 |
| 7  |                    |                     | limitations, multiplicity of analyses, results from similar    |       |
| 8  |                    |                     | studies, and other relevant evidence.                          |       |
| 9  |                    |                     |                                                                |       |
| 10 |                    |                     |                                                                |       |
| 11 | Generalisability   | <a href="#">#21</a> | Discuss the generalisability (external validity) of the study  | 13    |
| 12 |                    |                     | results                                                        |       |
| 13 |                    |                     |                                                                |       |
| 14 |                    |                     |                                                                |       |
| 15 | <b>Other</b>       |                     |                                                                |       |
| 16 | <b>Information</b> |                     |                                                                |       |
| 17 |                    |                     |                                                                |       |
| 18 |                    |                     |                                                                |       |
| 19 | Funding            | <a href="#">#22</a> | Give the source of funding and the role of the funders for the | 16    |
| 20 |                    |                     | present study and, if applicable, for the original study on    |       |
| 21 |                    |                     | which the present article is based                             |       |
| 22 |                    |                     |                                                                |       |
| 23 |                    |                     |                                                                |       |

24 None The STROBE checklist is distributed under the terms of the Creative Commons Attribution  
25 License CC-BY. This checklist can be completed online using <https://www.goodreports.org/>, a tool  
26 made by the [EQUATOR Network](#) in collaboration with [Penelope.ai](#)  
27  
28  
29  
30  
31  
32  
33  
34  
35  
36  
37  
38  
39  
40  
41  
42  
43  
44  
45  
46  
47  
48  
49  
50  
51  
52  
53  
54  
55  
56  
57  
58  
59  
60

# BMJ Open

## Measuring Shared Decision-Making and Collaborative Goal Setting in Community Rehabilitation: A Focused Ethnography Using Cross-Sectional Surveys in Canada

|                                 |                                                                                                                                                                                                                                                                                                                                                              |
|---------------------------------|--------------------------------------------------------------------------------------------------------------------------------------------------------------------------------------------------------------------------------------------------------------------------------------------------------------------------------------------------------------|
| Journal:                        | <i>BMJ Open</i>                                                                                                                                                                                                                                                                                                                                              |
| Manuscript ID                   | bmjopen-2019-034745.R1                                                                                                                                                                                                                                                                                                                                       |
| Article Type:                   | Original research                                                                                                                                                                                                                                                                                                                                            |
| Date Submitted by the Author:   | 02-Apr-2020                                                                                                                                                                                                                                                                                                                                                  |
| Complete List of Authors:       | Manhas, Kiran; Alberta Health Services, Strategic Clinical Networks<br>Olson, Karin; University of Alberta, Faculty of Nursing<br>Churchill, Katie; Alberta Health Services, Health Professions, Strategy & Practice<br>Faris, Peter; Alberta Health Services<br>Vohra, Sunita; University of Alberta, Pediatrics<br>Wasylak, Tracy; Alberta Health Services |
| <b>Primary Subject Heading</b>: | Rehabilitation medicine                                                                                                                                                                                                                                                                                                                                      |
| Secondary Subject Heading:      | Health services research, Health policy, Ethics                                                                                                                                                                                                                                                                                                              |
| Keywords:                       | REHABILITATION MEDICINE, MEDICAL ETHICS, HEALTH SERVICES ADMINISTRATION & MANAGEMENT, Quality in health care < HEALTH SERVICES ADMINISTRATION & MANAGEMENT, ETHICS (see Medical Ethics)                                                                                                                                                                      |
|                                 |                                                                                                                                                                                                                                                                                                                                                              |

SCHOLARONE™  
Manuscripts



I, the Submitting Author has the right to grant and does grant on behalf of all authors of the Work (as defined in the below author licence), an exclusive licence and/or a non-exclusive licence for contributions from authors who are: i) UK Crown employees; ii) where BMJ has agreed a CC-BY licence shall apply, and/or iii) in accordance with the terms applicable for US Federal Government officers or employees acting as part of their official duties; on a worldwide, perpetual, irrevocable, royalty-free basis to BMJ Publishing Group Ltd ("BMJ") its licensees and where the relevant Journal is co-owned by BMJ to the co-owners of the Journal, to publish the Work in this journal and any other BMJ products and to exploit all rights, as set out in our [licence](#).

The Submitting Author accepts and understands that any supply made under these terms is made by BMJ to the Submitting Author unless you are acting as an employee on behalf of your employer or a postgraduate student of an affiliated institution which is paying any applicable article publishing charge ("APC") for Open Access articles. Where the Submitting Author wishes to make the Work available on an Open Access basis (and intends to pay the relevant APC), the terms of reuse of such Open Access shall be governed by a Creative Commons licence – details of these licences and which [Creative Commons](#) licence will apply to this Work are set out in our licence referred to above.

Other than as permitted in any relevant BMJ Author's Self Archiving Policies, I confirm this Work has not been accepted for publication elsewhere, is not being considered for publication elsewhere and does not duplicate material already published. I confirm all authors consent to publication of this Work and authorise the granting of this licence.

1  
2  
3 **Journal:** *BMJ Open*  
4  
5

6 **Title:** Measuring Shared Decision-Making and Collaborative Goal-Setting in  
7  
8 Community Rehabilitation: A Focused Ethnography Using Cross-Sectional Surveys in  
9  
10 Canada  
11

12  
13 **Authors:**  
14

15  
16 Kiran Pohar Manhas<sup>a,b,\*</sup>, Karin Olson<sup>b,c</sup>, Katie Churchill<sup>a,d,e</sup>, Peter Faris<sup>a</sup>, Sunita  
17  
18 Vohra<sup>b,f</sup>, and Tracy Wasylak<sup>a,g</sup>  
19

20  
21 <sup>a</sup> Alberta Health Services, Calgary, Canada ([Kiran.poharmanhas@ahs.ca](mailto:Kiran.poharmanhas@ahs.ca))  
22

23  
24 <sup>b</sup> Integrative Health Institute, University of Alberta, Edmonton, Canada  
25

26  
27 <sup>c</sup> Faculty of Nursing, University of Alberta, Edmonton, Canada  
28  
29 ([karin.olson@ualberta.ca](mailto:karin.olson@ualberta.ca))  
30

31  
32 <sup>d</sup> Department of Clinical Neurosciences, Cumming School of Medicine, University of  
33  
34 Calgary, Calgary, Canada ([Katie.churchill@ahs.ca](mailto:Katie.churchill@ahs.ca))  
35

36  
37 <sup>e</sup> Department of Occupational Therapy, University of Alberta, Edmonton, Canada  
38

39  
40 <sup>f</sup> Departments of Pediatrics and Psychiatry, Faculty of Medicine & Dentistry,  
41  
42 University of Alberta, Edmonton, Canada ([svohra@ualberta.ca](mailto:svohra@ualberta.ca))  
43

44  
45 <sup>g</sup> Faculty of Nursing, University of Calgary, Calgary, Canada ([tracy.wasylak@ahs.ca](mailto:tracy.wasylak@ahs.ca))  
46

47  
48 \*Corresponding Author contact information:  
49

50  
51 Kiran Pohar Manhas  
52  
53 c/o Strategic Clinical Networks™  
54  
55 Alberta Health Services  
56

1  
2  
3 Southport Tower, 10301 Southport Lane SW  
4 Calgary, Alberta T2W 1S7  
5  
6 Tel: 587-774-7734  
7  
8 Fax: unavailable  
9  
10 Email: [kiran.poharmanhas@ahs.ca](mailto:kiran.poharmanhas@ahs.ca)  
11  
12

13 **Manuscript Word Count: 4427**  
14

15  
16   
17 **ABSTRACT** (250 words)  
18  
19

20 **Objective:** To describe and measure the shared decision-making (SDM) experience,  
21 including goal-setting experiences, from the perspective of patients and providers in  
22 diverse community-rehabilitation settings.  
23  
24

25  
26  
27 **Design:** Prospective, longitudinal surveys  
28  
29

30 **Setting:** 13 primary level-of-care community-rehabilitation sites in diverse areas  
31 varying in geography, patient population, and provider discipline  
32  
33

34  
35 **Subjects:** 341 adult, English-speaking patient-participants, and 66 provider-  
36 participants  
37  
38

39  
40 **Measures:** ASK-MI (dyadic tool measuring SDM), WatLX™ (outpatient rehabilitation  
41 experience), and demographic questionnaire. Survey packages distributed at two time-  
42 points (T0=recruitment; T1=3-months-later)  
43  
44

45  
46 **Results:** We found that amongst 341 patient-provider dyads, 26.4% agreed that the  
47 appointment at recruitment involved high-quality SDM. Patient perceptions of goal-  
48 setting suggested that 19.6% of patients did not set a goal for their care, and only 11.4%  
49 set goals in functional language that tied directly to an activity/role/responsibility that  
50 was meaningful to their life. Better SDM was clinically associated with higher total  
51 family income (p=0.045).  
52  
53  
54  
55  
56  
57  
58  
59  
60

1  
2  
3 **Conclusions:** These findings provide evidence for the importance of SDM and goal-  
4 setting in community rehabilitation. Among patients, lower ratings of SDM  
5 corresponded with less recognition of their preferences. Actionable strategies include  
6 supporting financially-vulnerable patients in realizing SDM through training of  
7 providers to make extra space for such patients to share their preferences and better  
8 preparing patients to articulate their preferences. We recommend more research into  
9 strategies that advance highly-functional goal-setting with patients, and that lessen  
10 survey ceiling effects.  
11  
12  
13  
14  
15  
16

### 17 **Article Summary: Strengths and limitations of the study**

- 19 • One strength is that this study has a significant sample size, with 341  
20 patient participants completing surveys.  
21
- 22 • Another strength is that participant diversity allows for statistically-  
23 appropriate comparisons based on geography, level of privacy, patient  
24 demographics, and provider training.  
25
- 26 • Study limitations include that the survey measuring shared decision-  
27 making is novel, has a floor effect, and may be subject to acquiescence and  
28 social desirability biases.  
29  
30  
31  
32  
33  
34

35 **Keywords:** shared decision-making, community, rehabilitation, patient perspectives,  
36 provider perspectives, survey, goal-setting  
37  
38  
39  
40  
41  
42  
43  
44  
45  
46  
47  
48  
49  
50  
51  
52  
53  
54  
55  
56  
57  
58  
59  
60

## Introduction

Many public policies aim to better empower patients in their health and healthcare, [1–7]. Patient-centred care, which emphasizes shared decision-making (SDM) and patient engagement, is one strategy to empower patients [5]. SDM is an interpersonal decision-making process where provider(s) and patient make treatment choices collaboratively using best available evidence, patient values and preferences [8, 9].

SDM meets an ethical imperative to enable patient autonomy [10, 11]. Research suggests that SDM increases patient knowledge and satisfaction [12–14], enhances realization of treatment goals [15], moderately reduces inappropriate service utilization [16], and improves patient-reported outcomes [12, 17]. SDM is neither routinely utilized nor taught in healthcare [11, 18, 19].

SDM is multi-faceted [20]. Based on a systematic review (n=418 studies), Makoul & Clayman (2006) describe an SDM model with nine essential elements: problem-definition; presenting and discussing options; discussing patient values and abilities; discussing provider knowledge; clarifying understanding; decision-making; and arranging follow-up. This SDM model overlaps with conceptualizations, and practices, of collaborative goal-setting in rehabilitation [21, 22].

SDM literature emphasizes patient-physician interactions. Less research examines the impacts of SDM on other professionals, teams and organizations [10]; on the appropriate policy types for building SDM capacity within organizations [9]; and on SDM in rehabilitation involving primarily allied-health providers [21]. Authors of a narrative synthesis (n=15 studies) revealed that in-patient rehabilitation goal-setting did not permit patient input, was overly-controlled by staff, and involved parties lacking knowledge about SDM [21]. Five further studies evaluated a “train-the-trainer” program to promote SDM in inpatient rehabilitation using focus groups, surveys and a cluster-randomized controlled study, but did not fully elaborate the SDM experience in rehabilitation [23–27]. Other research theorizes on SDM in rehabilitation, positing on technology, ethics and collaboration [28–32]. The transferability of these findings to community contexts is unclear [21]. Inpatient and outpatient needs and resources vary, impacting communication and care [33, 34].

The measurement of SDM-related constructs remains challenging [35–37]. A plethora of SDM definitions contributed to many different SDM measurement tools being developed [35, 38, 39]. No universally-accepted standard outcome or experience



1  
2  
3 measure exists to assess SDM [35], particularly for non-physician interactions. A 2015  
4 review found that only four of 13 SDM tools involved patients during their development  
5 [37], bringing into question content validity. Potentially inaccurate presumptions remain  
6 that patients are aware of ‘decision points’ and that only one decision point exists per  
7 consult [37].  
8  
9  
10

11 While the OPTION GRID is a commonly-used tool to measure SDM [40, 41], its use  
12 of a third-party observer is not universally feasible in resource-constrained healthcare  
13 settings (as in our study context). Qualitative research by team members revealed  
14 challenges with a previously-published SDM tool (SDM-Q-9) in primary care and mental  
15 health settings (manuscript under review). Challenges included inability to capture the  
16 SDM phase when problems are discussed and prioritized; the lack of a “not applicable”  
17 option; an over-emphasis on medical conditions; a lack of relevance for non-  
18 pharmacological interventions; and, the lack of recognition that SDM is valuable in goal-  
19 setting, investigations, as well as (as opposed to exclusively for) exploring treatment  
20 options [Olson K, et al. “Development of the Alberta Shared Decision-Making  
21 Measurement Instrument” *Under Review*].  
22  
23  
24  
25  
26  
27  
28

29 In this context, the provincial health system sought to understand the experience of  
30 shared decision-making and collaborative goal-setting at diverse community  
31 rehabilitation sites across the province. This health system is the longest-running  
32 provincial health system in Canada and serves more than 4 million people. This work  
33 would form the baseline data to eventually evaluate the implementation of a novel model  
34 of care seeking to promote patient centred-care and collaborative goal-setting in  
35 community rehabilitation. In this study, for patients and providers of diverse  
36 community-rehabilitation sites across a single province in an industrialized country, we  
37 aimed to:  
38  
39  
40  
41  
42

- 43 (a) measure the prevalence of high-quality SDM experiences (compared to less than high  
44 quality SDM experiences);
- 45 (b) measure goal-setting perceptions by patients;
- 46 (c) determine any associations between SDM experience or goal-setting perceptions and  
47 demographic and contextual factors (e.g. geography, patient and provider age,  
48 gender, discipline).
- 49  
50  
51  
52

53 This study included a small pilot feasibility study in this population to understand the  
54 reliability of the SDM tool and recruitment logistics. This study complements another  
55  
56  
57  
58  
59  
60

1  
2  
3 in this population that used qualitative interviews to explore SDM experiences  
4 (manuscript under review). The research team included two patient-co-investigators  
5 who consulted on the research design, implementation and results dissemination.  
6  
7  
8  
9  
10

## 11 **Methods**

12 We used focused ethnography in this research program [42]. Ethnography involves  
13 making cultural inferences “(1) from what people say; (2) from the way people act; and  
14 (3) from the artifacts people use” [43]. We focused on the communities of patients and  
15 professionals composing diverse community-rehabilitation sites across a provincial  
16 geography. Focused ethnography features a problem-focused and context-specific  
17 approach; a focus on a discrete phenomenon; the conceptual orientation of a single  
18 researcher; involvement of limited participants; episodic participant observation;  
19 participants with specific knowledge; and an emphasis on academic and healthcare  
20 settings [44, 45]. We met all criteria save participant observation due to feasibility  
21 constraints. While this paper emphasizes the survey findings, this paper is part of a  
22 broader study that included qualitative interviews, focus groups, and patient-led data  
23 collection (manuscripts under review). Together, this research program followed an  
24 ethnographic methodology that underpinned its theoretical approach to data collection  
25 and analysis, which carried into this survey work equally. The surveys allowed a  
26 population-level perspective to inform the in-depth qualitative work (described  
27 elsewhere).  
28  
29  
30  
31  
32  
33  
34  
35  
36  
37

### 38 Participant Population

39 We captured diverse rehabilitation settings that saw outpatients including both  
40 public and private provider sites, as well as three geographic types (rural (population <  
41 10000), regional-urban (population between 10000 and 100000), and metropolitan-  
42 urban (where population > 100000)).  
43  
44  
45  
46

47 Participants included current patients and providers visiting and working,  
48 respectively, at study sites. Provider inclusion criterion was employment at the site at  
49 recruitment. Providers included allied-health professionals who were members of the  
50 rehabilitation team (e.g. physical therapists, occupational therapists, speech-language  
51 pathologists). Patient inclusion criteria included  $\geq 18$  years of age; their provider was  
52  
53  
54  
55  
56  
57  
58  
59  
60

1  
2  
3 participating; able to consent without proxy; and can understand and speak English.  
4  
5 There were no exclusion criteria.

### 6 Recruitment

7  
8 Site leadership informed provider recruitment. Tactics included email introductions  
9 followed by study presentations (by webinar, in-person, or one-on-one). After  
10 discussions, informed consent was procured.  
11

12  
13 Convenience sampling directed patient recruitment. Management identified onsite  
14 recruiters from clerical and therapy-assistant staff. Researchers trained recruiters to  
15 identify eligible patients, discuss participation, and record those patients accepting  
16 take-home study packages. While provider-participants may have mentioned the study  
17 to patients, only onsite recruiters distributed surveys. Recruitment was bounded by a  
18 four-week site maximum and a 20-patient limit per provider to minimize site and  
19 provider burden. Patient consent was implied by the mailed return of surveys; written  
20 consent was required for future data sharing and future research contact.  
21  
22

### 23 Data Collection

24  
25 We used validated surveys to measure SDM, goal-setting, quality of life and patient  
26 experience: at baseline (T0) we captured SDM (ASK-MI tool), perceptions on goal-setting,  
27 quality of life, demographic and contextual data; at 3-months post-baseline (T1) we  
28 captured quality of life and overall patient-reported rehabilitation experience (WatLX™  
29 survey). The patient demographic and contextual data captured self-reported age,  
30 gender, education, income, medical conditions, and their perceptions of their health  
31 journey (i.e. where they were in their rehabilitation, whether they perceived a goal was  
32 set for their rehabilitation, and if so what that goal was). The provider demographic and  
33 contextual data included self-reported age, gender, professional discipline, years of  
34 experience. Providers were also asked if they completed the HealthChange®  
35 Methodology workshop through their organization, which aims to educate providers in  
36 helping patients make the behaviour changes needed to promote health; such training  
37 impacts provider-patient interactions and could impact SDM as patient-centred  
38 communication is discussed [46]. Survey completion took 5-7 minutes per time-point.  
39  
40

41  
42 In a pilot feasibility study, we completed the following data collection strategies at  
43 two community rehabilitation sites with the modification that T1 would be at 6-weeks  
44 after recruitment (versus 3-months). The data collected was used to determine study  
45  
46  
47  
48  
49

1  
2  
3 logistics feasibility and the reliability of the ASK-MI results (via Cronbach's alpha  
4 determination).  
5

6 A novel, dyadic SDM tool was used given the infeasibility of using a 3<sup>rd</sup>-party  
7 reviewer, and the challenges in using the SDM-Q-9 in similar Alberta populations: the  
8 Alberta Shared decision-making Measurement Instrument (ASK-MI) (Figure 1 is the  
9 patient version; provider version is same except language transposed to address  
10 provider). Using a 6-point Likert Scale (with not-applicable option), patients and  
11 providers independently describe the appointment experience from a SDM-process  
12 perspective. This process involves patients and providers agreeing on the main concern;  
13 working together to make a plan that considers patients' wishes; and, ensuring the  
14 provider confirms patient understanding and next steps. The ASK-MI was developed  
15 and piloted in primary care and mental health clinics in Alberta (manuscript under  
16 review).  
17  
18  
19  
20  
21  
22  
23

24 The dyadic ASK-MI tool requires patient and provider to independently rate six facets  
25 of the SDM experience; lower numeric scores reflect higher quality SDM. Individual  
26 scores are summed; the two sum scores are compared to determine the final rating  
27 score: Excellent, Acceptable, or Unacceptable. When both patient and provider rate SDM  
28 highly, an Excellent rating score is reached. Disparity between parties would lead to a  
29 lower ASK-MI rating score. Full agreement on SDM Excellence equates to patient and  
30 provider both giving the best, lowest numeric score on each ASK-MI item. Using self-  
31 report, we collected contextual (e.g. group or individual appointment; were goals set with  
32 provider) and participant demographic data (e.g. age, gender, marital status).  
33  
34  
35  
36  
37  
38

39 The WatLX™ is a 2-page outpatient rehabilitation care patient experience survey  
40 meant for post-completion of rehabilitation care. The WatLX™ consists of 10 questions,  
41 where respondents can respond either not applicable or on a 7-point Likert scale.  
42 Psychometric testing of the WatLX™ involved 1174 cognitively-intact, English-speaking,  
43 adult outpatients who had completed a program of cardiac, musculoskeletal, neurologic,  
44 stroke, pulmonary, or speech language rehabilitative care in Ontario [47]. Reliability  
45 analyses compared the use of a 7-point to 5-point Likert scale in the WatLX™.  
46 Cronbach's alphas were 0.863 and 0.957 for the 5 and 7-point scale, and the ICC =  
47 0.827 and 0.880, respectively [47]. Generally, the higher the score, the more positive the  
48 patient experience. There is evidence of ceiling effects with the WatLX™.  
49  
50  
51  
52  
53  
54  
55  
56  
57  
58  
59  
60

1  
2  
3 The T0 take-home study package included a consent form and directions, the ASK-  
4 MI survey, a patient demographic form including their communication preference for  
5 the 3-month follow-up (T1) surveys (which included WatLX™). All envelopes were pre-  
6 addressed and stamped to support convenient, confidential return to the researchers.  
7  
8 Patients were directed to complete the surveys within 24 hours, so their appointment  
9 was fresh in their mind.  
10  
11

12  
13 When a patient took a study package, the recruiter logged the date, envelope  
14 number, patient's initials, and provider name. Daily, this recruitment information was  
15 sent to the lead researcher, who emailed the ASK-MI (provider version) tool to the named  
16 provider, along with the patient initials via personalized email link to REDCAP at the  
17 University of Alberta. Providers received one email per patient and had 48 hours to  
18 complete the survey.  
19  
20  
21

22  
23 The second time-point (T1), for patients only, was exactly three months post-  
24 recruitment. T1 data collection was by mail or email per patient-participant preference.  
25 Participants received email or phone reminders 1-week prior to T1, and at 7-days post-  
26 T1.  
27  
28

29 To ensure the accuracy of data entry of paper surveys, a randomly-selected 30% of  
30 the study sample was assessed at the close of data collection. If more than 10% of the  
31 data was incorrectly entered, then another random 30% of the study sample would have  
32 been checked. Errors were rectified immediately.  
33  
34

35 At the close of data collection, the research team developed a coding rubric by  
36 consensus to capture the presence, and level, of function in the rehabilitation goals  
37 perceived by patient participants (as described in the self-reported patient  
38 sociodemographic form). Level of functionality was informed by the Alberta Health  
39 Services definition that the goal “consider[ed] the whole person – individual context,  
40 personal factors, and how a health condition impacts participation in life... work, school,  
41 play, relationships, roles and any activities that the person loves to do” [48]. A goal was  
42 functional, if it related to participation in a role, responsibility or activity important to  
43 the person; the language of the goal spoke to activity and participation in life not the  
44 rehabilitation treatment plan. A goal was not functional if it did not speak to such a  
45 role, responsibility or activity important to the person (e.g. language focused on the  
46 treatment plan or general alleviation of symptoms). While one researcher (KPM) coded  
47  
48  
49  
50  
51  
52  
53  
54  
55  
56  
57  
58  
59  
60

1  
2  
3 all patient-participant self-reported perceptions, the team discussed and practiced the  
4 coding together to ensure consensus on approaches to described goals.  
5  
6  
7

### 8 Data Analysis

9  
10 After cleaning and coding the T0 and T1 data, we completed descriptive and  
11 exploratory analyses to address the research questions. The ASK-MI Score was  
12 collapsed into two different binary categorical variables: (a) Excellent versus  
13 Acceptable/Unacceptable; and (b) Full Agreement on SDM Excellence versus Not Full  
14 Agreement on SDM Score. The secondary variable was overall rehabilitative care  
15 experience (WatLX™). Independent variables included age, gender, patient income  
16 range, geographical area, and other demographic and contextual variables.  
17  
18  
19  
20

21 The distribution of interval and ratio type survey data (e.g. age) was checked for  
22 whether it is normally distributed. Test selection was based upon the results of these  
23 analysis (e.g. non-normally-distributed data was analyzed using non-parametric tests).  
24 We analyzed the questionnaire data descriptively, with means, standard deviations,  
25 both overall in community rehabilitation and based on contextual differences. For  
26 categorical data, chi-square tests directed comparisons between high versus low quality  
27 SDM; sub-analyses using tests of proportions considered this ratio of experiences in  
28 different demographic and organizational settings based on the size and quality of  
29 independent variable data collected. For the three surveys, where missing data was less  
30 than 5% across population, then used the 20% as the threshold for missing items: if ≤  
31 20% items missing, then median response used in place of the missing item to then  
32 score the survey; if > 20% of items missing, then the entire record was deleted from the  
33 analysis [49]. Univariate correlations were studied between each independent variables  
34 (age, gender, income, geographical area, provider discipline) and the ASK-MI score. A  
35 binary regression was completed to ascertain the effects of training (i.e. HealthChange  
36 participation), level of privacy during appointment, geographical setting, and timing of  
37 appointment (relative to patient's rehabilitation care journey). This model used a  
38 binomial distribution with log link function to obtain relative risks. We used backward  
39 elimination with the Akaike Information Criterion (AIC) to reduce the model. At each  
40 step, the variables with the largest associated decrease in the AIC at removal was deleted  
41 from the model. The steps continued until the removal of remaining variable resulted in  
42 an increase in the AIC.  
43  
44  
45  
46  
47  
48  
49  
50  
51  
52  
53  
54  
55  
56  
57  
58  
59  
60

## Results

### Pilot Feasibility Study Results

Phase 1 involved two community rehabilitation sites in an urban-metropolitan area in Alberta between March and May 2018 (n=24 patients and n=6 providers). The mean (range) participant age for patients and providers was 48.3 (22-71) and 37.4 (26-56) years, respectively. Most participants were White (87.5% patients; 80% providers) and female (66.7% patients; 60% providers). Fifty percent of patient-participants were employed, while 20.8% were retired. Patient-participants' total family income varied with 37.5% being affluent ( $\geq$  \$150000) and a combined 20.8% being less affluent ( $<$ \$35000). On average (range), provider-participants had 12 (3-30) years of experience and worked 31.7 (10-70) hours weekly.

Because only four patients completed follow-up surveys that included the WatLX™, we only assessed the reliability of the EQ-5D-5L and ASK-MI surveys in this population. Table 1 describes the tools' means, standard deviations and internal consistency assessments using Cronbach's alpha. Given the small sample, the reliability of these measures appear appropriate and related to estimates during tool development [50]. Field notes support the validity of the EQ-5D-5L and ASK-MI tools for participants. The ASK-MI scores were clustered in the excellent range, which is common to many patient-reported experience measures. The ASK-MI was completed by 24 patient-provider dyads. The scores obtained from these dyads scoring the SDM experience as Excellent (70.8%), Acceptable (29.2%), or Unacceptable (0%). Because complementary studies by study co-authors (manuscript under review) detail the psychometric validity of the instrument, we do not present further findings in that regard.

| <b>Tool</b> | <b>Mean</b>                              | <b>Standard Deviation</b>               | <b>Internal Consistency Measurement Tool</b> | <b>Internal Consistency Measurement</b> |
|-------------|------------------------------------------|-----------------------------------------|----------------------------------------------|-----------------------------------------|
| ASK-MI      | 6.96 (patients)<br>10 (providers)        | 1.93 (patients)<br>4.07 (providers)     | Cronbach's Alpha                             | 0.82                                    |
| EQ-5D-5L    | 73.6% (VAS)<br>0.760 (EQ-5D Index score) | 13.7 (VAS)<br>0.104 (EQ-5D Index score) | Cronbach's Alpha                             | 0.648                                   |

**Table 1.** Internal Consistency of Surveys in Pilot Feasibility Study

### Participant Information (Full Study)

Thirteen community-rehabilitation sites distributed 606 take-home survey packages; 341 patients returned them and thus implied consent to participate (response rate 56.2%). At T1, 209 patients returned surveys (response rate 61.3%, the remainder lost to follow-up).

Table 2 describes the patient-participant population. The patient-participants' mean (SD) age was 57.5 (16.4) years. Most patient-participants were female (58.9%), married (68.9%), Caucasian (90.9%), had some post-secondary education (70.4%), were at a 1:1 appointment with providers (90.9%), were neither at the first nor last appointment at recruitment (66.9%), and were receiving physiotherapy (68.6%). Participants varied in where they received their care: 46.3% were in an open exercise area, 48.4% were in a private area (either behind a privacy curtain or in private room), and 3.8% described their area as unique. The demographic profile was similar between T0 and T1 patient-participants.

|                            | <b>N (%)</b> |
|----------------------------|--------------|
| Patient Population         | 341 (100%)   |
| Mean Age in years (SD)     | 57.5 (16.4)  |
| Missing                    | 3 (0.9%)     |
| Gender                     |              |
| Male                       | 138 (40.5%)  |
| Female                     | 201 (58.9%)  |
| Missing                    | 2 (0.6%)     |
| Marital Status             |              |
| Single                     | 48 (14.1%)   |
| Married (legal/common law) | 235 (68.9%)  |
| Separated or Divorced      | 32 (9.4%)    |
| Widowed                    | 21 (6.2%)    |
| Missing                    | 5 (1.5%)     |
| Geographical Location      |              |
| Metropolitan-Urban         | 145 (42.5%)  |



|                               |             |
|-------------------------------|-------------|
| Regional-Urban                | 161 (47.2%) |
| Rural                         | 35 (10.3%)  |
| Education                     |             |
| High school diploma or less   | 96 (28.1%)  |
| Any post-secondary education  | 240 (70.4%) |
| Missing                       | 5 (1.5%)    |
| Employment Status             |             |
| Employed                      | 141 (41.3%) |
| Unemployed                    | 61 (17.9%)  |
| Retired                       | 135 (39.6%) |
| Missing                       | 4 (1.2%)    |
| Ethnicity                     |             |
| European Origins              | 310 (90.9%) |
| Indigenous (e.g. Inuk, Métis) | 10 (2.9%)   |
| Non-European Origins          | 21 (6.2%)   |
| Supplementary Insurance       |             |
| Yes                           | 144 (42.2%) |
| No                            | 160 (46.9%) |
| Prefer not to answer          | 37 (10.9%)  |
| Total Family Income           |             |
| Less than \$59999             | 106 (31.1%) |
| \$60000 to 99999              | 75 (22.0%)  |
| \$100000 or More              | 78 (22.9%)  |
| Prefer not to answer          | 82 (24%)    |

**Table 2.** Patient-Participant Demographics

Table 3 describes the provider-participant population. The provider-participants' mean (SD) age was 41.8 (9.86) years. Experience-wise, providers had a mean (SD) of 15.1 (10.3) years of experience. Providers represented six rehabilitation disciplines, with physiotherapy (53.0%) and occupational therapy (19.7%) being most prevalent. Most providers were female (60.6%), Caucasian (60.6%), trained in Canada (66.7%), and had primarily clinical provider roles (vs. management) (71.2%).

| Provider Participant Characteristics | N (%) or Mean (SD) |
|--------------------------------------|--------------------|
| Population                           | 66                 |
| Age (years)                          | 41.83 (9.86)       |
| Missing                              | 13 (19.7%)         |
| Gender                               |                    |
| Male                                 | 13 (19.7%)         |
| Female                               | 40 (60.6%)         |
| Missing                              | 13 (19.7%)         |
| Provider Discipline                  |                    |
| Occupational Therapy                 | 13 (19.7%)         |
| Physiotherapy                        | 35 (53.0%)         |
| Other                                | 5 (7.5%)           |
| Missing                              | 13 (19.7%)         |

|                             |            |
|-----------------------------|------------|
| Country of Training         |            |
| Canada                      | 44 (66.7%) |
| Outside of Canada           | 9 (13.6%)  |
| Missing                     | 13 (19.7%) |
| Ethnicity                   |            |
| European Ethnic Origins     | 40 (60.6%) |
| Non-European Ethnic Origins | 8 (12.1%)  |
| Missing                     | 18 (27.2%) |
| Geographical Location       |            |
| Metropolitan-Urban          | 36 (54.5%) |
| Regional-Urban              | 24 (36.4%) |
| Rural                       | 6 (9.1%)   |

**Table 3.** Provider-Participant Demographics

Table 4 describes the provider-participants' work settings. Providers worked a mean (SD) of 31.8 (9.0) hours/week in direct patient care, and saw a mean (SD) of 28.8 (17.6) patients per week. The outpatient clinical settings varied for providers, including community-based (31.8%) and hospital-based (45.5%) clinics. The clinical populations included at least 10 diverse populations, including general adults (25.8%), musculoskeletal (16.7%), and neurorehabilitation (13.6%). Providers were evenly split on participation in a person-centred behaviour-change course (HealthChange® Methodology [51]): 39.4% said they had taken it, 40.9% said they had not taken it, and 19.7% responses were missing herein. Of the providers who had taken HealthChange®, most providers perceived that it influenced their patient interactions to some degree (76.9%) (vs. to a great degree (15.4%)). The perceived influence of HealthChange® on site processes was less clear: 42.3% of providers saw no influence, while 53.8% saw some degree of influence.

| Provider Participant Characteristics | N (%) or Mean (SD) |
|--------------------------------------|--------------------|
| Setting                              |                    |
| Community-Based Clinic               | 21 (31.8%)         |
| Hospital, outpatient Clinic          | 30 (45.5%)         |
| Primary Patient Population           |                    |
| Complex Adults                       | 2 (3.0%)           |
| Hand/Foot/Cardiac                    | 4 (6.0%)           |
| General Adults                       | 17 (25.8%)         |
| Musculoskeletal (MSK)                | 11 (16.7%)         |
| Neuro                                | 9 (13.6%)          |
| Ortho/Surgery                        | 3 (4.5%)           |
| Seniors                              | 4 (6.1%)           |
| Missing                              | 16 (24.2%)         |
| Average Waitlist (days) for Clinic   | 16.59 (17.59)      |

|                                                |            |
|------------------------------------------------|------------|
| Missing                                        | 18 (27.3%) |
| HealthChange® Completion                       |            |
| Yes                                            | 26 (39.4%) |
| No                                             | 27 (40.9%) |
| Missing                                        | 13 (19.7%) |
| HealthChange® Influenced Patient Interactions? |            |
| No Influence                                   | 1 (3.8%)   |
| To Some Degree                                 | 20 (76.9%) |
| To a Great Degree                              | 4 (15.4%)  |
| Missing                                        | 1 (3.8%)   |
| HealthChange® Influenced Site Processes?       |            |
| No Influence                                   | 11 (42.3%) |
| To Some Degree                                 | 14 (53.8%) |
| To a Great Degree                              | 0 (0%)     |
| Missing                                        | 1 (3.8%)   |

**Table 4.** Provider-Participants' Clinical Setting

#### SDM and Goal-Setting Prevalence in Community Rehabilitation

Using current ASK-MI scoring guidelines, 78.9% of T0 patient-provider appointments rated Excellent (Table 5). Given the evident floor effect of the ASK-MI (i.e. more than 15% of respondents have the lowest score, which is the best value [52]), the survey developers will re-assess the scoring algorithm (incomplete at time of manuscript submission).

| Shared Decision-Making Experience                                       | N (%) or Mean (SD) |
|-------------------------------------------------------------------------|--------------------|
| ASK-MI Score                                                            |                    |
| Excellent                                                               | 269 (78.9%)        |
| Acceptable                                                              | 37 (10.9%)         |
| Unacceptable                                                            | 2 (0.6%)           |
| Missing/Unable to Calculate                                             | 14 (4.1%)          |
| Patient and Provider had Full Agreement on SDM Excellence               |                    |
| Full Agreement                                                          | 90 (26.4%)         |
| Less Than Full Agreement                                                | 218 (63.9%)        |
| Missing/Unable to Determine                                             | 14 (4.1%)          |
| Was a Goal Set with Provider?                                           |                    |
| Yes                                                                     | 270 (79.2%)        |
| No                                                                      | 67 (19.6%)         |
| Missing                                                                 | 4 (1.2%)           |
| Level of Functionality of the Patient-Stated Goal                       |                    |
| Highly Functional, focused on everyday activity (i.e. patient language) | 39 (11.4%)         |
| Moderately Functional, focused on general mobility                      | 140 (41.1%)        |
|                                                                         | 76 (22.3%)         |

|                                                                    |            |
|--------------------------------------------------------------------|------------|
| Not Functional, focused on treatment plan (i.e. provider language) | 86 (25.2%) |
| Not Applicable, no goal was set or goal not provided               |            |

**Table 5.** Prevalence of Shared Decision-Making and Goal-Setting

Looking at full agreement on SDM excellence or not, at T0, 26.4% of patient-provider encounters involved full agreement on SDM excellence. Figures 2 and 3 display the frequency of responses across the 6-item Likert scale for each ASK-MI question for patients and providers, respectively. These two graphs reveal that, across the six items, providers agreed less often about SDM excellence (i.e. relatively fewer responses at 'strongly agree').

For patients, there was less agreement that the patient and provider planned together to address the patient's preferences and that the plan considered the patient's wishes and abilities. Patients more often strongly agreed that the provider checked the patient's understanding of the plan and that there was agreement on the plan created.

For providers, there was less agreement that the patient and provider worked together to make a plan that addressed patient preferences. Providers more often strongly agreed that there was clarity and agreement on the visit's main focus; that the provider checked for patient understanding; and that the patient and provider agreed on the plan created.

Table 6 compares the three geographical settings on prevalence of high quality SDM (i.e. full agreement on SDM excellence) in patient-provider encounters, which demonstrates no statistically significant differences in the quality of SDM experiences between geographical areas: metropolitan areas (19.9%) and regional areas (33.8%) ( $p=0.068$ ).

| Variable                                   | Geography                                  |                                 |                             | F statistic Value (df) | P-value |
|--------------------------------------------|--------------------------------------------|---------------------------------|-----------------------------|------------------------|---------|
|                                            | Metropolitan Urban Mean (SD) [95% CI] OR % | Regional Urban Mean (SD) 95% CI | Rural Mean (SD) 95% CI      |                        |         |
| Patient Age                                | 53.36 (17.29) [50.51-56.21]                | 61.08 (14.88) [58.74,63.41]     | 57.97 (15.14) [52.77-63.17] | 8.824 (df 2)           | < 0.001 |
| Months Knew Provider Before Recruitment    | 8.40 (14.91) [5.54,11.26]                  | 24.64 (2.39) [5.03,14.52]       | 51.76 (63.95) [25.36-78.16] | 25.88                  | <0.001  |
| % Appointments with Excellent ASK-MI Score | 84.2%                                      | 89.0%                           | 90.9%                       | 1.91 (df 2)            | 0.384   |

|                                                         |       |       |       |              |         |
|---------------------------------------------------------|-------|-------|-------|--------------|---------|
| % of Appointments with Full Agreement on SDM Excellence | 19.9% | 33.8% | 26.7% | 11.73 (df 6) | 0.068   |
| % Patients Perceived that Goals were Set                | 81.3% | 79.1% | 80.0% | 0.22 (df 2)  | 0.90    |
| % Perceived Goals were Functional                       | 16.4% | 6.3%  | 14.3% | 8.627        | 0.196   |
| % Providers Took HealthChange® Before                   | 20.7% | 56.7% | 40.0% | 37.05 (df 4) | < 0.001 |
| % Appointments in Private Area                          | 31.7% | 69.2% | 68.6% | 46.25        | < 0.001 |
| Income                                                  |       |       |       | 43.09        | < 0.001 |
| Less than \$59999                                       | 26.1% | 40.9% | 20.6% |              |         |
| \$60000 to 99999                                        | 26.8% | 21.4% | 14.7% |              |         |
| \$100000 or More                                        | 37.0% | 12.3% | 23.5% |              |         |
| Prefer not to answer                                    | 10.1% | 25.3% | 41.2% |              |         |
| Rehabilitation Patient Received                         |       |       |       | 14.07 (df 4) | 0.007   |
| Physiotherapy                                           | 69.7% | 87.2% | 74.3% |              |         |
| Occupational Therapy                                    | 27.0% | 10.6% | 25.7% |              |         |
| Other                                                   | 3.3%  | 2.1%  | 0%    |              |         |

**Table 6.** Comparison of Three Geographical Areas on SDM, Demographic and Contextual Variables

At T0, 19.4% of patients stated that they had not set a goal for their rehabilitation care (Figure 4). When patients had set a goal, they were asked to describe the goal. We categorized the patient-perceived goals based on level of functionality (Table 5). Only 11.4% of patients stated goals that met the Alberta Health Services' definition of functionality. A broader definition of functionality includes goals that aim for general improvements in, for example, mobility or strength. Under this broad definition, 42.6% of patients perceive their rehabilitation goals as aimed towards achievements or activities important to their life (Figure 5). Some 22.3% of patients perceived goals as equal to the treatment plan (e.g. doing home exercises, coming to appointments).

#### SDM, Goal-Setting, and Associated Factors

In the first phase, we used univariate Chi-square tests of correlation. SDM experience quality was not associated with whether patients' perceived that goals were set or whether patients' perceived goals that were functional. SDM experience was not associated with other immutable patient characteristics (e.g. gender, education, employment status, insurance access, income) or appointment type (Table 7). The only

patient-related features associated with SDM timing of appointment (65.1% high-quality-SDM vs. 58.0% less-quality-SDM,  $p=0.035$ ).

| Variable                          | Patient & Provider Full Agreement on SDM Excellence? |              | Pearson Chi-Square Value (df) | P-value |
|-----------------------------------|------------------------------------------------------|--------------|-------------------------------|---------|
|                                   | Yes Count (%)                                        | No Count (%) |                               |         |
| Seen Provider Before Recruitment? |                                                      |              |                               |         |
| Yes                               | 76.9%                                                | 74.4%        | 0.313 (df 2)                  | 0.855   |
| No                                | 23.1%                                                | 25.6%        |                               |         |
| Appointment Timing at Recruitment |                                                      |              |                               |         |
| First Appointment                 | 27.9%                                                | 22.6%        | 13.57 (df 6)                  | 0.035   |
| Near Start of Care                | 37.2%                                                | 35.4%        |                               |         |
| Near End of Care                  | 30.2%                                                | 38.7%        |                               |         |
| Last Appointment                  | 4.7%                                                 | 3.3%         |                               |         |
| Appointment Type                  |                                                      |              |                               |         |
| Group                             | 6.6%                                                 | 9.5%         | 0.734 (df 2)                  | 0.693   |
| Individual                        | 93.4%                                                | 90.5%        |                               |         |
| Where in Facility                 |                                                      |              |                               |         |
| Open Area                         | 39.8%                                                | 49.3%        | 7.05 (df 3)                   | 0.070   |
| Private Area or Other             | 60.2%                                                | 50.7%        |                               |         |
| Patient Perceived Goals Set?      |                                                      |              |                               |         |
| Yes                               | 80.2%                                                | 81.7%        | 2.567 (df 2)                  | 0.277   |
| No                                | 19.8%                                                | 18.3%        |                               |         |
| Perceived Goals were Functional?  |                                                      |              |                               |         |
| Yes                               | 14.3%                                                | 10.9%        | 0.793 (df 2)                  | 0.673   |
| No                                | 85.7%                                                | 89.1%        |                               |         |
| Female Gender                     | 58.2%                                                | 58.6%        | 0.015 (df 2)                  | 0.993   |
| Marital Status                    |                                                      |              |                               |         |
| Married (incl common law)         | 72.5%                                                | 69.9%        | 3.08 (df 3)                   | 0.379   |
| Not, or No Longer, Married        | 27.5%                                                | 30.1%        |                               |         |
| Education                         |                                                      |              |                               |         |
| High school diploma or less       | 30.8%                                                | 26.5%        | 2.68 (df 3)                   | 0.443   |
| Any post-secondary education      | 69.2%                                                | 73.5%        |                               |         |
| Employment                        |                                                      |              |                               |         |
| Employed                          | 41.8%                                                | 42.9%        | 3.50 (df 6)                   | 0.743   |
| Unemployed                        | 16.5%                                                | 17.8%        |                               |         |
| Retired                           | 41.8%                                                | 39.3%        |                               |         |
| Insurance                         |                                                      |              |                               |         |

|                             |       |       |                 |       |
|-----------------------------|-------|-------|-----------------|-------|
| Yes                         | 45.1% | 43.8% | 7.515 (df<br>6) | 0.276 |
| No                          | 41.8% | 48.4% |                 |       |
| Prefer not to answer        | 13.2% | 7.8%  |                 |       |
| Income                      |       |       | 5.91 (df<br>6)  | 0.43  |
| Less than \$59999           | 34.3% | 50.0% |                 |       |
| \$60000 to 99999            | 27.4% | 23.5% |                 |       |
| \$100000 or More            | 13.9% | 11.8% |                 |       |
| Prefer not to answer        | 24.3% | 14.7% |                 |       |
| Provider Discipline         |       |       | 12.69 (df<br>6) | 0.048 |
| Physiotherapy               | 74.4% | 81.3% |                 |       |
| Occupational Therapy        | 25.6% | 15.5% |                 |       |
| Other                       | 0%    | 3.1%  |                 |       |
| Provider Took HealthChange? |       |       | 11.11 (df<br>6) | 0.085 |
| Yes                         | 73.9% | 41.2% |                 |       |
| No                          | 26.1% | 58.8% |                 |       |
| Provider Trained in Canada  | 85.3% | 83.2% | 0.264 (df<br>2) | 0.877 |

**Table 7.** Relationship between Full Agreement on SDM (High Quality SDM) and Other Demographic or Contextual Factors

SDM experience was not associated with the providers' experience (in years since graduation) or the time since the provider took HealthChange®. SDM was not statistically-significantly associated with other features such as more privacy during the appointment (60.2% high-quality-SDM vs. 50.7% in low-quality-SDM,  $p=0.070$ ), non-physiotherapy (74.4% physiotherapy in high-quality-SDM vs. 81.3% physiotherapy in low-quality-SDM,  $p=0.091$ ) and if the provider had taken HealthChange® (73.9% in high-quality-SDM vs. only 41.2% high-quality-SDM if not taken,  $p=0.085$ ).

SDM and goal-setting varied across the three geographical areas (Table 5). More providers had taken HealthChange® ( $p<0.001$ ) in regional settings compared to rural and metropolitan settings. There was no difference in the proportion of patients with functional goals across geographies. Demographically, more patients had lower total family income in regional areas (40.9% lowest-income-bracket vs. 26.1% (metropolitan) or 20.6% (rural),  $p<0.001$ ). Contextually, metropolitan-urban areas were unique in that fewer appointments were in private areas (31.7% vs. 69.2% in regional and 68.6% in rural,  $p<0.001$ ) and fewer providers had taken person-centred behaviour-change training (HealthChange®) (20.7% vs. 56.7% in regional and 40.0% in rural,  $p<0.001$ ). Finally, occupational therapy was represented least often in regional-urban appointments (10.6% vs. 27.0% (metropolitan) and 25.7% (rural),  $p=0.007$ ).

A backwards, stepwise logistic regression was performed to ascertain the effects of appointment timing at recruitment, level of privacy (per location at setting), geographical setting, and whether the provider took HealthChange® on the likelihood that the patient and provider fully agreed on the excellence of the SDM experience. The final model included HealthChange® training and geographical setting, while appointment timing and privacy were removed as not statistically significant. The final model reveals the following relative risks ([95% confidence interval], p-value): 2.463 ([1.650,3.816],  $p < 0.001$ ) for regional vs. metropolitan settings; 1.399 ([0.646,2.652],  $p = 0.329$ ) for rural vs. metropolitan settings; and 0.439 ([0.284,0.649],  $p < 0.001$ ) for taken HealthChange® vs. not taken. Providers who took the training were less likely to rate their interactions with the highest score (37/119 = 31.6%) when compared with providers who did not take the training (82/178 = 47.4%;  $P < 0.01$ ). Provider training was not associated with patient ratings. Patients with providers who took the training did not rate their interactions as less favorable than patients with providers who did not take the training (69/119 = 61.6% vs 110/178 = 64.7%;  $P = 0.876$ ).

Patients who perceived that a goal was set for their care saw a higher proportion of occupational therapists (35.5% vs. 14.7%,  $p = 0.001$ ). While the time a provider knew the patient before T0 was associated with whether a goal was set ( $p = 0.054$ ), the variance was high. Few other patient or provider characteristics were associated with patient perceptions of goal-setting. Patient perceptions of goal-setting for their rehabilitation did not differ by geographical setting, patient gender, marital status, education, employment status, or total family income (Table 8). Provider experience was not associated with patients' perceptions of goal-setting. Provider HealthChange® participation was not associated with patients' perception of goals setting or the functionality of the goal set.

| Variable                                 | Did Patient Perceive that a Goal was Set for Rehabilitation Care? |                         | Test Statistic Value (df) | P-value |
|------------------------------------------|-------------------------------------------------------------------|-------------------------|---------------------------|---------|
|                                          | Yes<br>Mean (SD)<br>OR %                                          | No<br>Mean (SD)<br>OR % |                           |         |
| WatLX™ Overall Rehabilitation Experience | 9.034 (1.251)                                                     | 8.717 (1.953)           | F=1.47 (df 1)             | 0.227   |
| Patient Age at T0                        | 57.23 (15.92)                                                     | 57.30 (18.14)           | F=0.001 (df 1)            | 0.974   |
| Provider's Experience                    | 14.05 (10.67)                                                     | 13.91 (10.17)           | F=0.008 (df 1)            | 0.930   |



|                                                                                             |                                                      |                                                      |                        |       |
|---------------------------------------------------------------------------------------------|------------------------------------------------------|------------------------------------------------------|------------------------|-------|
| Time Patient Knew Provider                                                                  | 11.51 (24.63)                                        | 21.93 (51.61)                                        | F=3.760 (df 1)         | 0.054 |
| Months Since Provider Took HealthChange®                                                    | 11.87 (19.86)                                        | 19.65 (26.73)                                        | F=2.546 (df 1)         | 0.113 |
| % Patients with Female Gender                                                               | 59.6%                                                | 54.0%                                                | $\chi^2=0.666$ (df 1)  | 0.414 |
| % Providers took HealthChange®                                                              | 39.2%                                                | 42.6%                                                | $\chi^2=0.474$ (df 2)  | 0.789 |
| Where in Facility<br>Open Area<br>Private Area or Other                                     | 49.1%<br>50.9%                                       | 37.5%<br>62.5%                                       | $\chi^2= 2.780$ (df 1) | 0.095 |
| Marital Status<br>Married (incl common law)<br>Not, or No Longer, Married                   | 190 (71.2%)<br>77 (28.8%)                            | 43 (65.2%)<br>23 (34.8%)                             | $\chi^2=0.910$ (df 1)  | 0.34  |
| Education<br>High school diploma or less<br>Any post-secondary education                    | 72 (27.0%)<br>195 (73.0%)                            | 23 (34.8%)<br>43 (65.2%)                             | $\chi^2=1.612$ (df 1)  | 0.204 |
| Employment<br>Employed<br>Unemployed<br>Retired                                             | 118 (44.2%)<br>46 (17.2%)<br>103 (38.6%)             | 23 (34.3%)<br>15 (22.4%)<br>29 (43.3%)               | $\chi^2=2.316$ (df 2)  | 0.314 |
| Income<br>Less than \$59999<br>\$60000 to 99999<br>\$100000 or More<br>Prefer not to answer | 80 (30.7%)<br>63 (24.1%)<br>64 (24.5%)<br>54 (20.7%) | 25 (40.3%)<br>11 (17.7%)<br>14 (22.6%)<br>12 (19.4%) | $\chi^2=2.458$ (df 3)  | 0.483 |
| Provider Discipline<br>Physiotherapy<br>Occupational Therapy<br>Other                       | 192 (82.8%)<br>34 (14.7%)<br>6 (2.6%)                | 39 (62.9%)<br>22 (35.5%)<br>1 (1.6%)                 | $\chi^2=13.79$ (df 2)  | 0.001 |

**Table 8.** Clinically Relevant Differences Between Whether Patient Set a Goal or Not During Care and Other Variables

Finally, the mean (SD) overall WatLX™ rating of patient experience was 8.97 (1.39), where 10 was the highest rating. Item mean (SD) ratings ranged from 5.65 (1.35) to 6.79 (0.579) (7 was highest rating). Figure 6 demonstrates the distribution of responses along the 7-point Likert scale for these 10 items. The item with the greatest use of not applicable was having chosen family or friend given information that they needed about

1  
2  
3 the patient's care, which suggests this question may not be relevant for many patients.  
4 The lowest rated items were for achieving treatment goals and controlling physical pain  
5 as much as possible. The highest-rated items were for being treated with courtesy,  
6 feeling safe during treatment activities and would recommend to others.  
7  
8

9  
10 The mean (SD) overall rehabilitation experience when patients' experienced high-  
11 quality SDM experiences was 9.07 (1.57), and was not different from the experience of  
12 participants who reported "not high-quality" SDM (8.94 (1.41),  $p=0.735$ ). Similarly,  
13 patient perceptions of a goal being set was not associated with patients' overall  
14 rehabilitation experience rating (9.03 (1.25) vs. 8.72 (1.95),  $p=0.227$ ).  
15  
16  
17  
18

## 19 **Discussion**

20  
21 These findings correspond with current literature but also provide a foundation for  
22 expansion [23–25, 53, 54]. Previous literature reviews suggested very negative and  
23 limited SDM experiences in rehabilitation [53]. A narrative synthesis (n=15 studies)  
24 revealed that in-patient rehabilitation goal-setting did not permit patient input, was  
25 overly-controlled by staff, was challenging for time and patient-load reasons, and  
26 involved parties lacking SDM knowledge [53]. Our data suggest that many patients and  
27 providers rate SDM-quality high even though some providers do take a leading (or  
28 controlling) role. For patients, the lowest ratings relate to the recognition of patient  
29 preferences, which is at the heart of SDM. Providers were more critical than patients on  
30 SDM experiences, which suggests a receptivity to strategies to improve SDM. This  
31 critical nature may be expanded by training in patient-centred care principles. Our  
32 multivariate analysis revealed that exposure to HealthChange® training decreased the  
33 likelihood of full agreement between the patient and provider on SDM excellence during  
34 the appointment. Further analyses revealed that provider training was not associated  
35 with patient ratings, but providers who took HealthChange® training were less likely to  
36 rate their interactions with the best (lowest) score. This finding also suggests that  
37 perhaps patients who tended to judge interactions as positive also tended to have  
38 providers who had taken the course.  
39  
40  
41  
42  
43  
44  
45  
46  
47  
48  
49

50 While the literature in rehabilitation often conflates goal-setting and SDM [53, 55],  
51 our findings suggest that may be inappropriate. Patient-participant perceptions of  
52 whether goals were set, and the connection (or not) between set goals and patient lives,  
53 calls for further investigation. Nearly 1 in 5 patients in this provincial health-system did  
54  
55  
56  
57  
58  
59  
60

1  
2  
3 not set goals for their rehabilitation care. If goal functionality is modestly measured to  
4 include general and specific connections to patients' everyday activities, roles and  
5 responsibilities, then only every other patient set a goal in language that was meaningful  
6 to their lives and activities. Patient engagement and SDM are strategies to support  
7 movement towards meaningful goal-setting, which itself supports patients in working  
8 on treatment plans that motivate them and move them in the direction that they would  
9 like to go [6].

14 While full agreement on SDM excellence was less frequently associated with  
15 providers who took HealthChange®, most providers felt that HealthChange® influenced  
16 their patient interactions and site processes to some degree (76.9% and 53.8%,  
17 respectively). In addition, providers who took the training were less likely to rate their  
18 interactions with the highest score (37/119 = 31.6%) when compared with providers  
19 who did not take the training (82/178 = 47.4%;  $P < 0.01$ ). Provider training was not  
20 associated with patient ratings. Patients with providers who took the training did not  
21 rate their interactions as less favorable than patients with providers who did not take  
22 the training (69/119 = 61.6% vs 110/178 = 64.7%;  $P=0.876$ ). This suggests that  
23 providers who took the training may be more discerning when judging their interactions  
24 with patients.  
25  
26  
27  
28  
29  
30  
31

34 This work, however, may suffer from similar challenges as the train-the-trainer  
35 SDM-development activities completed previously in Europe that did not yield increased  
36 patient involvement in decision-making [24, 25]. In our study and that in Europe,  
37 providers perceive an impact of their training relating to the processual aspects of SDM,  
38 but in both cases a statistically-significant positive impacts on SDM is not determined  
39 between those with training and those without [24, 25]. More research is required to  
40 determine what facets of SDM and patient-centred communication training lead to  
41 tangible improvements in SDM experiences.  
42  
43  
44  
45  
46  
47

48 Most non-modifiable patient characteristics (including age) were not significantly  
49 associated with the quality of SDM or goal-setting. Only total family income was  
50 associated with SDM experience. These findings corroborate the literature that SDM is  
51 a skill that can be taught and not an innate trait of an individual [56]. Total family  
52 income is a marker of socioeconomic status and relative vulnerability; it is not about  
53  
54  
55  
56  
57  
58  
59

1  
2  
3 capacity or education because education level was not associated with SDM experience.  
4 Further strategies and training are likely required to support providers and  
5 organizations in identifying, then approaching and empowering, more economically-  
6 vulnerable patients in SDM.  
7  
8

9 The literature describes SDM, while highly relational (conceptually and practically),  
10 is influenced by contextual factors such as time and setting [18, 57, 58]. Our findings  
11 do not quantify further details on the contextual factors. Our regression results  
12 suggested that geographical settings do vary on quality of SDM. Non-metropolitan areas,  
13 which often have more resources but busier clinics, had lower likelihoods of high-quality  
14 SDM experiences compared to rural and regional settings. Geographical areas did vary  
15 statistically on types of rehabilitation providers, months patient and provider knew each  
16 other, and, provider training in patient-centred principles. Finally, as different  
17 disciplines seem to have varying success with SDM, there may be an opportunity to  
18 promote greater transdisciplinary learning, practice and sharing in community-  
19 rehabilitation sites. This would support the development of a community of practice,  
20 which would also sustain learnings from person-centred training (e.g. HealthChange®)  
21 through ongoing discussion.  
22  
23  
24  
25  
26  
27  
28  
29

30 Based on participant demographics, these findings confidently apply to diverse  
31 community rehabilitation settings across Alberta. The patient population was fairly  
32 distributed amongst different family incomes, insurance access, and employment. These  
33 findings were not as highly represented from patients originating from rural  
34 communities, ethnocultural communities, and less-educated populations (i.e. less than  
35 high school).  
36  
37  
38  
39

40 Participating providers were mostly fairly experienced. The findings apply to hospital-  
41 based and community-based settings. These findings may not apply to new-graduates  
42 or providers trained outside of Canada. Most providers represented two rehabilitation  
43 disciplines: occupational therapy and physiotherapy. While several other disciplines  
44 were present to a lesser degree, it may be useful to examine these research questions  
45 where these other disciplines are more populous.  
46  
47  
48  
49  
50

## 51 Limitations

52 We recognize several study limitations. First, we tried to minimize recall (memory)  
53 bias by placing a 24-hour limit on participants to complete surveys, so the appointment  
54  
55  
56  
57  
58  
59  
60

1  
2  
3 is fresh in their minds. We recognize that patients may not have completed the survey  
4 on-time with take-home packages since it was outside the supervision of researchers  
5 and recruiters.  
6  
7

8 Second, we tried to lessen the risk of loss at 3-month follow-up using several tactics  
9 from Dillman et al. [59]. These tactics included allowing participant preference to dictate  
10 the form of follow-up (email or paper); using a mix of email and phone reminders both  
11 pre- and post- T1. We lost about 40% of patients at T1. Demographically, the patient-  
12 participants at recruitment and follow-up did not differ significantly on any patient  
13 characteristics.  
14  
15

16 Third, Phase-1 learnings suggested that there may be a selection bias and non-  
17 response bias. Patients with extreme experiences (either good or bad) could have been  
18 more interested in participation, which could differ significantly from the general  
19 patient-population experience. It was unlikely, given the difficulty in patient recruitment  
20 generally, to recruit non-responders to participate in a non-responder survey. This  
21 study prioritized significant recruitment using convenience sampling to lessen the  
22 influence of these biases.  
23  
24  
25  
26  
27  
28

29 Fourth, there may have been a Hawthorne effect on providers wherein their  
30 knowledge of a study assessing their communication altered their communicative  
31 behaviours. A previous feasibility study demonstrated that rehabilitation professionals  
32 were accustomed to being observed during practice given their own training, the  
33 multidisciplinary players, and trainee presence at many sites. For patients, they would  
34 generally not know of the study until after their appointment, so their actions likely  
35 would not be influenced by reactive effects.  
36  
37  
38  
39

40 Fifth, there may have been acquiescence and social desirability bias whereby  
41 participants frequently endorsed positive statements and where participants wished to  
42 present themselves at their best, including being fully engaged in SDM. Historically, this  
43 has been shown to have a small but pervasive effect. To minimize this, we aimed to  
44 recruit until a high survey sample size and diversity of population were recruited.  
45  
46  
47

48 Sixth, for feasibility, survey tools were used differently from their original validation  
49 process. The WatLX™ was completed 3-months after recruitment which corresponded  
50 differently across patients' rehabilitation journey; not all patients completed the  
51 WatLX™ within the two weeks after care ended. Most patients stated at recruitment that  
52 they were neither at the first nor last appointment. Only 4.4% of patients were on their  
53  
54  
55  
56  
57  
58  
59  
60

1  
2  
3 last appointment at recruitment. The most egregious difference in WatLX™ completion  
4 (i.e. 3 months after last appointment) was only possible for a rarity of participants. The  
5 gains made in data collection compared to the feasibility study suggest that this  
6 compromise in data collection was worthwhile. The resonance and corroboration of  
7 findings across methods and studies confirms that the tools remained valid.  
8  
9

10  
11 Seventh, we cannot guarantee that ASK-MI survey completion was based on  
12 assessments of the recruitment-date appointment only rather than on the totality of  
13 experience with that patient, provider or clinic. Many participating patient comments in  
14 the ASK-MI referred to the entirety of their rehabilitation care. Patients may have felt  
15 that there was commonality or consistency in interactions across appointments, so it  
16 was then appropriate to assess SDM across the rehabilitation journey. Further research  
17 is required to understand when and how patients judge SDM in rehabilitation along the  
18 different points in the rehabilitation journey.  
19  
20  
21  
22  
23  
24  
25

## 26 **Conclusions**

27 While we recognize several study limitations, we believe our forethought and  
28 planning to consider and address these limits ensures the methodological rigour of this  
29 study. This study complements our qualitative findings,[60], that SDM is complex not  
30 monolithic in community rehabilitation. There is room to improve upon patient and  
31 provider practices of SDM and collaborative goal-setting in these settings, and we offer  
32 strategies such as further person-centred training, enhancing privacy during  
33 appointments, and building transdisciplinary communities of practice around how  
34 rehabilitation providers can approach SDM with patients. Further research is required  
35 to determine whether novel scoring of the ASK-MI influences SDM prevalence, which  
36 tactics to identify and redress the vulnerability of low-family-income patients are useful  
37 to advance SDM for this vulnerable group. This study suggests that SDM experience  
38 and goal-setting are not associated with longitudinal perceptions of rehabilitation  
39 experience and treatment goals being met, using a tool with high ceiling effects. We  
40 recommend more research into strategies that advance highly-functional goal-setting  
41 with patients, and to re-examine these relationships with tools without (or with less  
42 prominent) ceiling effects.  
43  
44  
45  
46  
47  
48  
49  
50  
51  
52  
53  
54  
55  
56  
57  
58  
59  
60

## Acknowledgements

We acknowledge our participants, both patient and provider, at the participating sites. We acknowledge the site managers, therapy assistants, clerks and non-participating providers at each site who were pivotal to recruitment and supporting the study more broadly. We particularly thank Jean Miller and Sylvia Teare, who are Patient and Community Engagement Researchers and who acted as patient consultants on this project. We thank the provincial and regional leadership at Alberta Health Services, including Lisa Warner and Elaine Finseth, who were (and continue to be) champions of this work. We also acknowledge Momentum Health, and their leadership Shaun Macauley, who were pivotal to the realization of this work.

## Author Contributions:

KPM helped contribute to the study's conceptualization and design. KPM implemented the study methodology, managed resources, and developed all manuscript drafts.

KO helped contribute to the study's conceptualization and provided ongoing supervision in close collaboration with the other senior authors (SV, TW) regarding its methods, conduct, analysis, and manuscript development.

KC helped contribute to the study's operationalization; provided ongoing support on conduct, analysis, and manuscript development; and, reviewed and edited this manuscript.

PF helped contribute to data analysis during study implementation, final write-up of the organizational report, and this manuscript's analyses and results and discussion write-up; and, reviewed and edited this manuscript.

SV helped contribute to the study's conceptualization and provided ongoing supervision in close collaboration with the other senior authors (KO, TW) regarding its methods, conduct, analysis, and manuscript development.

1  
2  
3 TW helped contribute to the study's conceptualization and provided ongoing  
4 supervision in close collaboration with the other senior authors (KO, SV) regarding its  
5 methods, conduct, analysis, and manuscript development.  
6  
7

8  
9  
10 **Competing Interests: none**

11  
12  
13 **Funding Support:**

14 This work was supported by the Canadian Institutes for Health Research Health System  
15 Impact Fellowship [Code 201705HI7-388576-170744, 2017]. Supplemental funding  
16 was provided by the Strategic Clinical Networks™ and Research Challenge portfolios at  
17 Alberta Health Services.  
18  
19

20  
21  
22 **Ethics Approval:** Research ethics board approval was secured for this study from the  
23 Conjoint Health Research Ethics Board, University of Calgary.  
24  
25

26  
27 **Provenance, Peer Review:** Not commissioned; externally peer reviewed.  
28  
29

30  
31 **Data Sharing Statement:** Availability of data and materials. For the data wherein  
32 patients consented to future data sharing, the de-identified data is currently being  
33 prepared for deposit in a secure data repository for data sharing upon application.  
34  
35

36  
37 **Patient Consent:** Patient-participants provided consent to share aggregated data in  
38 peer-reviewed publications.  
39  
40

41  
42 **Patient and Public Involvement:** Two Patient and Community Engagement  
43 Researchers (PaCERs) were involved in informing and vetting the research proposal  
44 including research questions, methods, data collection and plans for data analysis.  
45 Patients were not involved in study recruitment. Provider participants were invited to  
46 webinars describing the study findings. The PaCERs are acknowledged in the  
47 acknowledgement section, as was their preference.  
48  
49  
50

51  
52  
53 **References**

54  
55 [1] Department of Health. *Liberating the NHS: No decision about me without me.*  
56  
57  
58  
59



- 1  
2  
3 London [https://www.gov.uk/government/uploads/system/uploads/attachment\\_data/file/216980/Liberating-the-NHS-No-decision-about-me-without-me-Government-response.pdf](https://www.gov.uk/government/uploads/system/uploads/attachment_data/file/216980/Liberating-the-NHS-No-decision-about-me-without-me-Government-response.pdf) (2010).
- 4  
5  
6  
7  
8 [2] Pope TM. Certified Patient Decision Aids : Solving Persistent Problems with  
9 Informed Consent Law. *J Law Med Ethics* 2017; 45: 12–40.
- 10  
11 [3] Canadian Institutes of Health Research. Strategy for Patient-Oriented Research  
12 (SPOR). Epub ahead of print 2019. DOI: 1.
- 13  
14 [4] Alberta Innovates. The Alberta SPOR Support  
15 Unit <https://albertainnovates.ca/our-health-innovation-focus/the-alberta-spor-support-unit/> (2017, accessed 14 March 2017).
- 16  
17  
18 [5] Advisory Panel on Healthcare Innovation. *Unleashing Innovation: Excellent  
19 Healthcare for Canada* <http://www.healthycanadians.gc.ca/publications/health-system-systeme-sante/report-healthcare-innovation-rapport-soins/alt/report-healthcare-innovation-rapport-soins-eng.pdf> (2015).
- 20  
21  
22 [6] AHS Provincial Rehabilitation Forum. *Rehabilitation Strategic Plan 2016-2019*.  
23 Edmonton, AB <https://www.alberta-tr.org/media/46444/ahs-rehabilitation-strategic-plan-2016.pdf> (2016).
- 24  
25  
26 [7] Alberta Health Services. *Alberta Health Services Health Plan & Business Plan  
27 2016-17*. Edmonton,  
28 AB <https://www.albertahealthservices.ca/assets/about/publications/ahs-pub-health-business-plan.pdf> (2016).
- 29  
30  
31 [8] O'Connor AM, Wennberg JE, Legare F, et al. Toward the 'tipping point': Decision  
32 aids and informed patient choice. *Health Aff* 2007; 26: 716–725.
- 33  
34  
35 [9] Légaré F, Witteman HO. Shared decision making: Examining key elements and  
36 barriers to adoption into routine clinical practice. *Health Aff* 2013; 32: 276–284.
- 37  
38  
39 [10] Elwyn G, Frosch DL, Kobrin S. Implementing shared decision-making: consider  
40 all the consequences. *Implement Sci* 2015; 11: 114.
- 41  
42  
43 [11] Godolphin W. Shared decision-making. *Healthc Q* 2009; 12: e186–e190.
- 44  
45  
46 [12] Shay LA, Lafata JE. Where is the evidence? A systematic review of shared  
47 decision making and patient outcomes. *Med Decis Making* 2015; 35: 114–31.
- 48  
49  
50 [13] Kashaf S, McGill ET, Berger ZD. Shared decision-making and outcomes in type 2  
51 diabetes: A systematic review and meta-analysis. *Patient Educ Couns* 2017; 100:  
52 2159–2171.
- 53  
54  
55  
56  
57  
58  
59  
60

- 1  
2  
3 [14] Flynn D, Knoedler MA, Hess EP, et al. Engaging Patients in Health Care  
4 Decisions in the Emergency Department Through Shared Decision-making: A  
5 Systematic Review. *Acad Emerg Med* 2012; 19: 959–967.  
6  
7  
8 [15] Kew KM, Malik P, Aniruddhan K, et al. Shared decision-making for people with  
9 asthma ( Review ). *Cochrane Database Syst Rev*. Epub ahead of print 2017. DOI:  
10 10.1002/14651858.CD012330.pub2.www.cochranelibrary.com.  
11  
12  
13 [16] Coxeter P, Del Mar CB, McGregor L, et al. Interventions to facilitate shared  
14 decision making to address antibiotic use for acute respiratory infections in  
15 primary care. *Cochrane Database Syst Rev* 2015; CD010907.  
16  
17  
18 [17] Kashaf M, McGill E. Does Shared Decision Making in Cancer Treatment Improve  
19 Quality of Life? A Systematic Literature Review. *Med Decis Making* 2015; 35:  
20 1037–48.  
21  
22  
23 [18] Légaré F, Ratté S, Gravel K, et al. Barriers and facilitators to implementing  
24 shared decision-making in clinical practice: Update of a systematic review of  
25 health professionals' perceptions. *Patient Educ Couns* 2008; 73: 526–535.  
26  
27  
28 [19] Joseph-Williams N, Lloyd A, Edwards A, et al. Implementing shared decision  
29 making in the NHS: lessons from the MAGIC programme. *Bmj* 2017; 1744:  
30 j1744.  
31  
32  
33 [20] Makoul G, Clayman ML. An integrative model of shared decision making in  
34 medical encounters. *Patient Educ Couns* 2006; 60: 301–12.  
35  
36  
37 [21] Rose A, Rosewilliam S, Soundy A. Shared decision making within goal setting in  
38 rehabilitation settings: A systematic review. *Patient Educ Couns* 2017; 100: 65–  
39 75.  
40  
41  
42 [22] Wade DT. Goal setting in rehabilitation: an overview of what, why and how. *Clin*  
43 *Rehabil* 2009; 23: 291–295.  
44  
45  
46 [23] Körner M, Ehrhardt H, Steger A-K. Designing an interprofessional training  
47 program for shared decision making. *J Interprof Care* 2013; 27: 146–154.  
48  
49  
50 [24] Körner M, Ehrhardt H, Steger AK, et al. Interprofessional SDM train-the-trainer  
51 program 'Fit for SDM': Provider satisfaction and impact on participation. *Patient*  
52 *Educ Couns* 2012; 89: 122–128.  
53  
54  
55 [25] Koerner M Michaelis M, Ehrhardt H, Steger AK, Zerpies E, Bengel J WM. A  
56 multicentre cluster-randomized controlled study to evaluate a train-the-trainer  
57 programme for implementing internal and external participation in medical  
58  
59  
60

- 1  
2  
3 rehabilitation. *Clinical rehabilitation* 2014; 28: 20.
- 4  
5 [26] Quaschnig K, Körner M, Wirtz M. Analyzing the effects of shared decision-  
6 making, empathy and team interaction on patient satisfaction and treatment  
7 acceptance in medical rehabilitation using a structural equation modeling  
8 approach. *Patient Educ Couns* 2013; 91: 167–175.
- 9  
10  
11 [27] Plewnia A, Korner M, BJ. Patient-centeredness and its impact on patient  
12 satisfaction and treatment outcomes in medical rehabilitation. *Patient education*  
13 *and counseling* 2016; 99: 2063.
- 14  
15  
16 [28] Grim K, Rosenberg D, Svedberg P, et al. Development and usability testing of a  
17 web-based decision support for users and health professionals in psychiatric  
18 services. *Spec Issue Digit Mob Ment Heal* 2017; 40: 293–302.
- 19  
20  
21 [29] Tomori K, Uezu S, Kinjo S, et al. Utilization of the iPad Application: Aid for  
22 Decision-making in Occupation Choice. *Occup Ther Int* 2012; 19: 88–97.
- 23  
24 [30] Delany C, Galvin J. Ethics and shared decision-making in paediatric  
25 occupational therapy practice. *Dev Neurorehabil* 2014; 17: 347–354.
- 26  
27 [31] Karol RL. Team models in neurorehabilitation: Structure, function, and culture  
28 change. *NeuroRehabilitation* 2014; 34: 655–669.
- 29  
30 [32] Ness O, Borg M, Semb R, et al. ‘Walking alongside:’ collaborative practices in  
31 mental health and substance use care. *Int J Ment Health Syst* 2014; 8: 55.
- 32  
33 [33] McMurray J, McNeil H, Lafortune C, et al. Measuring patients’ experience of  
34 rehabilitation services across the care continuum. Part II: Key dimensions. *Arch*  
35 *Phys Med Rehabil* 2016; 97: 121–130.
- 36  
37 [34] McMurray J, McNeil H, Lafortune C, et al. Measuring patients’ experience of  
38 rehabilitation services across the care continuum. Part I: A systematic review of  
39 the literature. *Arch Phys Med Rehabil* 2016; 97: 104–120.
- 40  
41 [35] Scholl I, Loon MK, Sepucha K, et al. Measurement of shared decision making – a  
42 review of instruments. *Z Evid Fortbild Qual Gesundheitswes* 2011; 105: 313–324.
- 43  
44 [36] Scholl I, Kriston L, Dirmaier J, et al. Comparing the nine-item Shared Decision-  
45 Making Questionnaire to the OPTION Scale - an attempt to establish convergent  
46 validity. *Heal Expect* 2015; 18: 137–150.
- 47  
48 [37] Barr PJ, Elwyn G. Measurement challenges in shared decision making: putting  
49 the ‘patient’ in patient-reported measures. *Heal Expect* 2016; 19: 993–1001.
- 50  
51 [38] Bouniols N, Leclère B, Moret L. Evaluating the quality of shared decision making  
52  
53  
54  
55  
56  
57  
58  
59  
60

- 1  
2  
3 during the patient-carer encounter: a systematic review of tools. *BMC Res Notes*  
4 2016; 9: 382.  
5  
6 [39] Légaré F, Moher D, Elwyn G, et al. Instruments to assess the perception of  
7 physicians in the decision-making process of specific clinical encounters: a  
8 systematic review. *BMC Med Inform Decis Mak* 2007; 7: 30.  
9  
10 [40] Stubenrouch FE, Pieterse AH, Falkenberg R, et al. OPTION5 versus OPTION12  
11 instruments to appreciate the extent to which healthcare providers involve  
12 patients in decision-making. *Patient Educ Couns* 2016; 99: 1062–1068.  
13  
14 [41] Barr PJ, O'Malley AJ, Tsulukidze M, et al. The psychometric properties of  
15 Observer OPTION5, an observer measure of shared decision making. *Patient*  
16 *Educ Couns* 2015; 98: 970–976.  
17  
18 [42] Speziale HJS, Carpenter DR. *Qualitative Research in Nursing: Advancing the*  
19 *Humanistic Imperative*. Lippincott. Philadelphia, PA, 2007.  
20  
21 [43] Spradley J. *The Ethnographic Interview*. Belmont, CA: Wadsworth, 1979.  
22  
23 [44] Cruz E, Higginbottom G. The use of focused ethnography in nursing research.  
24 *Nurs Res* 2013; 20: 36–43.  
25  
26 [45] Higginbottom G, Pillay JJ, Boadu NY. Guidance on Performing Focused  
27 Ethnographies with an Emphasis on Healthcare Research. *Qual Rep* 2013; 18:  
28 1–6.  
29  
30 [46] HealthChange Associates, Alberta Health Services. *Person-Centred Practice Using*  
31 *HealthChange Methodology*. Edmonton, AB, 2017.  
32  
33 [47] McMurray J, McNeil H, Elliott J, et al. WatLX: A system-wide patient experience  
34 measure for rehabilitation. In: *Canadian Association for Health Systems and*  
35 *Policy Research 2016 Conference: A Learning Healthcare System*. Toronto, ON,  
36 2016.  
37  
38 [48] Alberta Health Services. *Rehabilitation conceptual framework*. Edmonton, AB,  
39 2012.  
40  
41 [49] Howell DC. The analysis of missing data. In: Outhwaite W, Turner S (eds)  
42 *Handbook of Social Science Methodology*. London, UK:  
43 SAGE [http://www.uvm.edu/~dhowell/StatPages/Missing\\_Data/MissingDataFin](http://www.uvm.edu/~dhowell/StatPages/Missing_Data/MissingDataFinal.pdf)  
44 [al.pdf](http://www.uvm.edu/~dhowell/StatPages/Missing_Data/MissingDataFinal.pdf) (2008).  
45  
46 [50] Janssen MF, Pickard AS, Golicki D, et al. Measurement properties of the EQ-5D-  
47 5L compared to the EQ-5D-3L across eight patient groups: A multi-country  
48  
49  
50  
51  
52  
53  
54  
55  
56  
57  
58  
59  
60

- 1  
2  
3 study. *Qual Life Res* 2013; 22: 1717–1727.
- 4  
5 [51] Gale J, Skouteris H. Health coaching: Facilitating health behaviour change for  
6 chronic condition prevention and self-management. In: Caltabiano M,  
7 Ricciardelli L (eds) *Handbook of Applied Topics in Health Psychology*. Wiley-  
8 Blackwell, 2013.
- 9  
10  
11 [52] Devet HCW, Terwee CB, Mokkink LB, et al. *Measurement in Medicine*.  
12 Cambridge, UK: Cambridge University Press, 2011.
- 13  
14 [53] Rose A, Rosewilliam S, Soundy A. Shared decision making within goal setting in  
15 rehabilitation settings: A systematic review. *Patient Educ Couns* 2017; 100: 65–  
16 75.
- 17  
18  
19 [54] Koerner M, Wirtz M, Michaelis M, et al. A multicentre cluster-randomized  
20 controlled study to evaluate a train-the-trainer programme for implementing  
21 internal and external participation in medical rehabilitation. *Clin Rehabil* 2014;  
22 28: 20–35.
- 23  
24 [55] Pritchard-Wiart L, Thompson-Hodgetts S, McKillop AB. A review of goal setting  
25 theories relevant to goal setting in paediatric rehabilitation. *Clin Rehabil*. Epub  
26 ahead of print 2019. DOI: 10.1177/0269215519846220.
- 27  
28 [56] Légaré F, Thompson-Leduc P. Twelve myths about shared decision making.  
29 *Patient Educ Couns* 2014; 96: 281–286.
- 30  
31 [57] Elwyn G, Scholl I, Tietbohl C, et al. “Many miles to go ...”: a  
32 systematic review of the implementation of patient decision support  
33 interventions into routine clinical practice. *BMC Med Inform Decis Mak* 2013; 13  
34 Suppl 2: S14.
- 35  
36 [58] Joseph-Williams N, Elwyn G, Edwards A. Knowledge is not power for patients: A  
37 systematic review and thematic synthesis of patient-reported barriers and  
38 facilitators to shared decision making. *Patient Educ Couns* 2014; 94: 291–309.
- 39  
40 [59] Dillman D, Smyth J, Christian L. *Internet, mail and mixed-mode surveys: The*  
41 *tailored design method*. Hoboken, NJ: John Wiley & Sons, Ltd, 2009.
- 42  
43 [60] Manhas KP, Olson K, Churchill K, et al. Shared Decision-Making Experiences in  
44 Community Rehabilitation in Alberta, Canada.
- 45  
46  
47  
48  
49  
50  
51  
52  
53  
54  
55  
56  
57  
58  
59  
60

**Figure 1.** The Alberta Shared Decision-Making Measurement Instrument (ASK-MI)

| <b>Alberta Shared Decision Making Measurement Instrument</b><br>(Patient/Client)                                                                                                                                                                                                                                                                                                                                                                                                                                                                                                                                                                                        |                |              |                  |                |                 |                   |                |
|-------------------------------------------------------------------------------------------------------------------------------------------------------------------------------------------------------------------------------------------------------------------------------------------------------------------------------------------------------------------------------------------------------------------------------------------------------------------------------------------------------------------------------------------------------------------------------------------------------------------------------------------------------------------------|----------------|--------------|------------------|----------------|-----------------|-------------------|----------------|
| <p>The purpose of this tool is to gather information about shared decision making between you and your health care provider. A shared decision is one that you and your health care provider make together, after considering options based on the best available evidence and your preferences. For the purposes of this tool, a health care provider is anyone with whom you have a clinical appointment regarding your health, such as a physician, a nurse, a nurse practitioner, a dietician, a social worker, a mental health therapist, or an exercise specialist.</p> <p>Instructions: Put an x in each row to indicate how strongly you agree or disagree.</p> |                |              |                  |                |                 |                   |                |
|                                                                                                                                                                                                                                                                                                                                                                                                                                                                                                                                                                                                                                                                         | Strongly Agree | Mostly Agree | Moderately Agree | Slightly Agree | Mostly Disagree | Strongly Disagree | Not Applicable |
| Q1. My health care provider and I agreed on the main concern(s) and focus of the visit.                                                                                                                                                                                                                                                                                                                                                                                                                                                                                                                                                                                 |                |              |                  |                |                 |                   |                |
| Q2. My health care provider and I worked together to make a plan that addressed my preferences.                                                                                                                                                                                                                                                                                                                                                                                                                                                                                                                                                                         |                |              |                  |                |                 |                   |                |
| Q3. The plan that my health care provider and I made considered my wishes and abilities.                                                                                                                                                                                                                                                                                                                                                                                                                                                                                                                                                                                |                |              |                  |                |                 |                   |                |
| Q4. My health care provider checked that I understood the plan.                                                                                                                                                                                                                                                                                                                                                                                                                                                                                                                                                                                                         |                |              |                  |                |                 |                   |                |
| Q5. My health care provider checked if I could follow the plan between now and my next appointment.                                                                                                                                                                                                                                                                                                                                                                                                                                                                                                                                                                     |                |              |                  |                |                 |                   |                |
| Q6. I agreed with the plan my health care provider and I made.                                                                                                                                                                                                                                                                                                                                                                                                                                                                                                                                                                                                          |                |              |                  |                |                 |                   |                |
| <p>Comments:</p>                                                                                                                                                                                                                                                                                                                                                                                                                                                                                                                                                                                                                                                        |                |              |                  |                |                 |                   |                |

1  
2  
3  
4  
5  
6  
7  
8  
9  
10  
11  
12  
13  
14  
15  
16  
17  
18  
19  
20  
21  
22  
23  
24  
25  
26  
27  
28  
29  
30  
31  
32  
33  
34  
35  
36  
37  
38  
39  
40  
41  
42  
43  
44  
45  
46  
47  
48  
49  
50  
51  
52  
53  
54  
55  
56  
57  
58  
59  
60

For peer review only

**Figure 2.** Patient Responses on the Six ASK-MI Items on SDM Experience

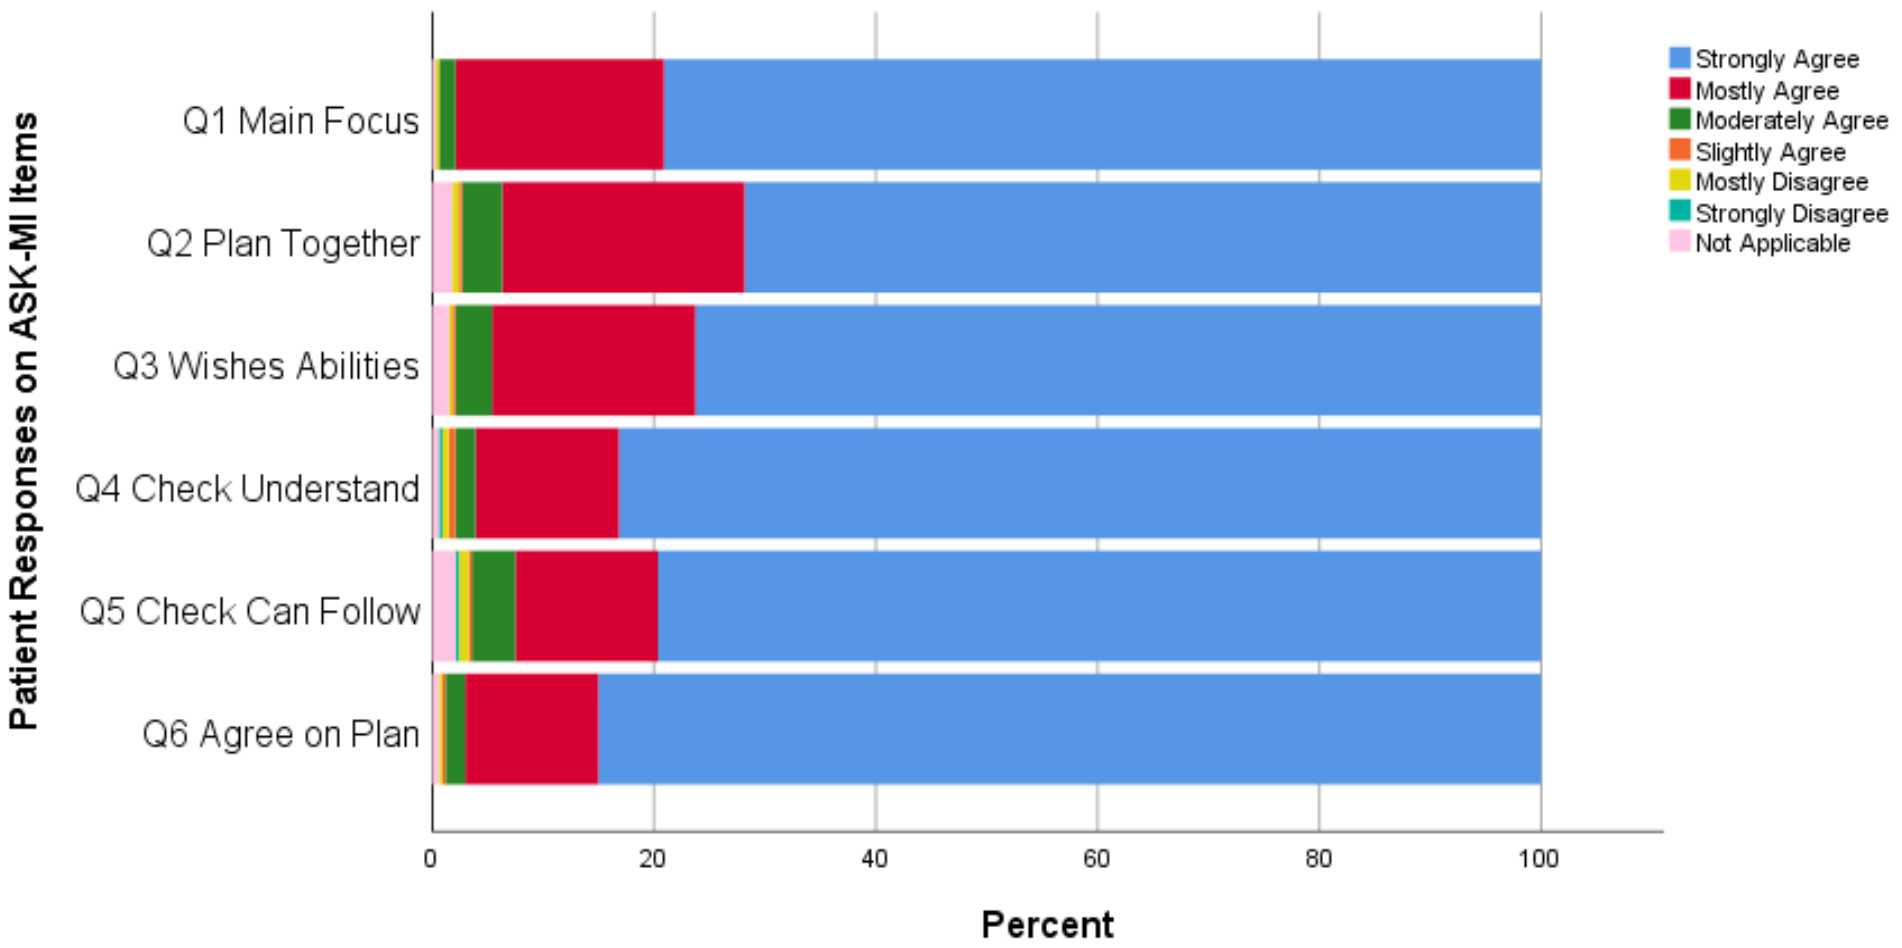



**Figure 3.** Provider Responses on the Six ASK-MI Items on SDM Experience

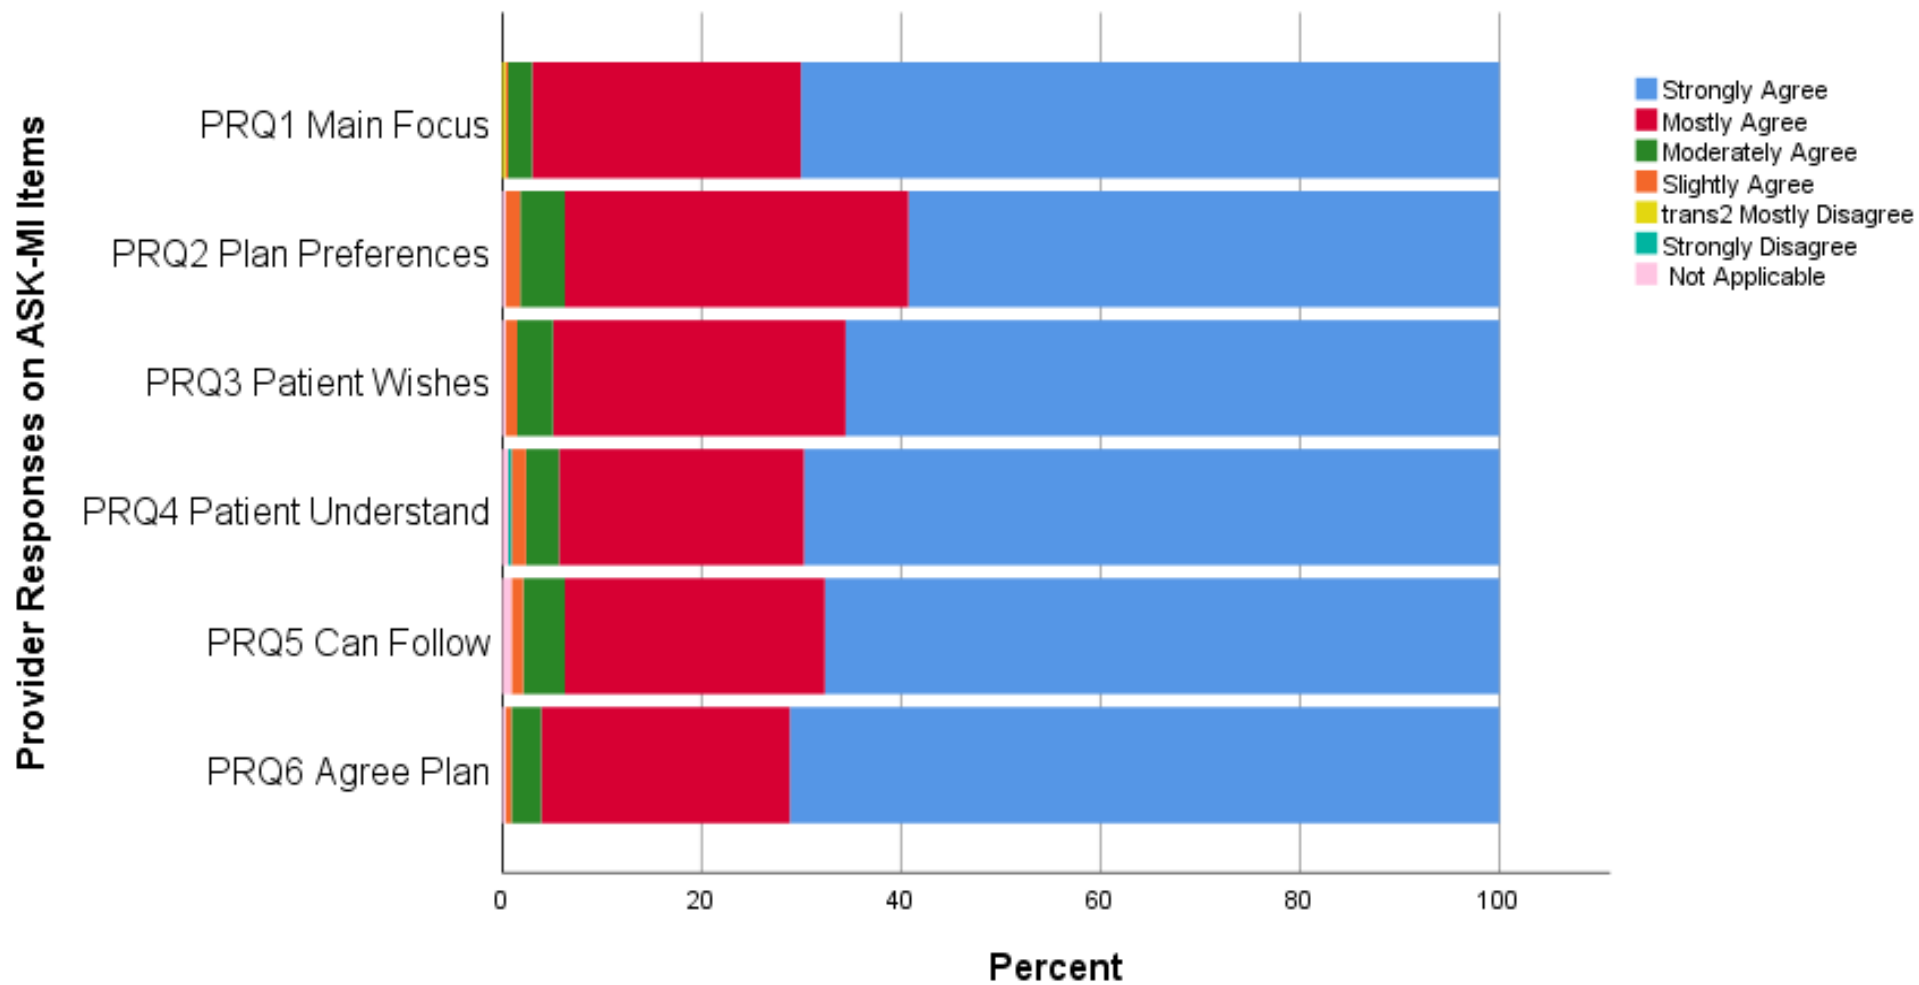

**Figure 4.** Patient Perceptions of Goal Setting Occurrence

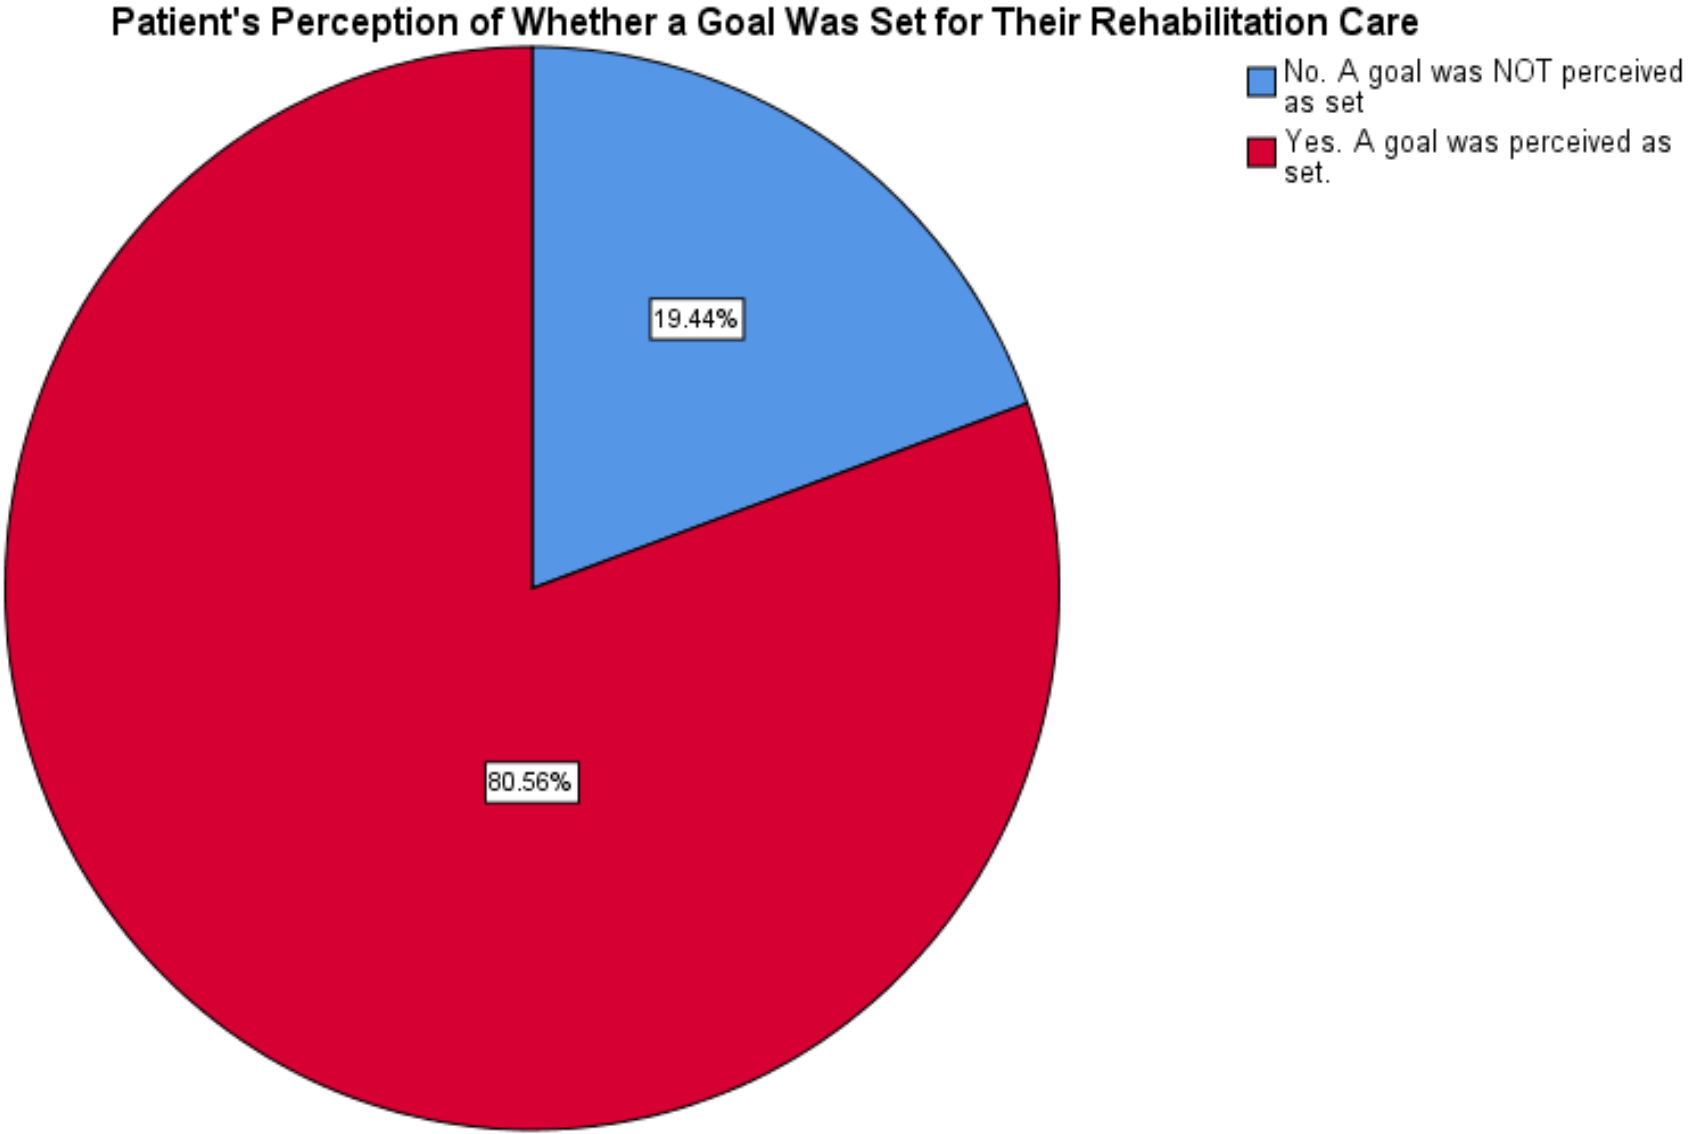

1  
2  
3  
4  
5  
6  
7  
8  
9  
10  
11  
12  
13  
14  
15  
16  
17  
18  
19  
20  
21  
22  
23  
24  
25  
26  
27  
28  
29  
30  
31  
32  
33  
34  
35  
36  
37  
38  
39  
40  
41  
42  
43  
44  
45  
46  
47

1  
2  
3  
4  
5  
6  
7  
8  
9  
10  
11  
12  
13  
14  
15  
16  
17  
18  
19  
20  
21  
22  
23  
24  
25  
26  
27  
28  
29  
30  
31  
32  
33  
34  
35  
36  
37  
38  
39  
40  
41  
42  
43  
44  
45  
46  
47

**Figure 5.** Level of Functionality of Patient-Stated Goals

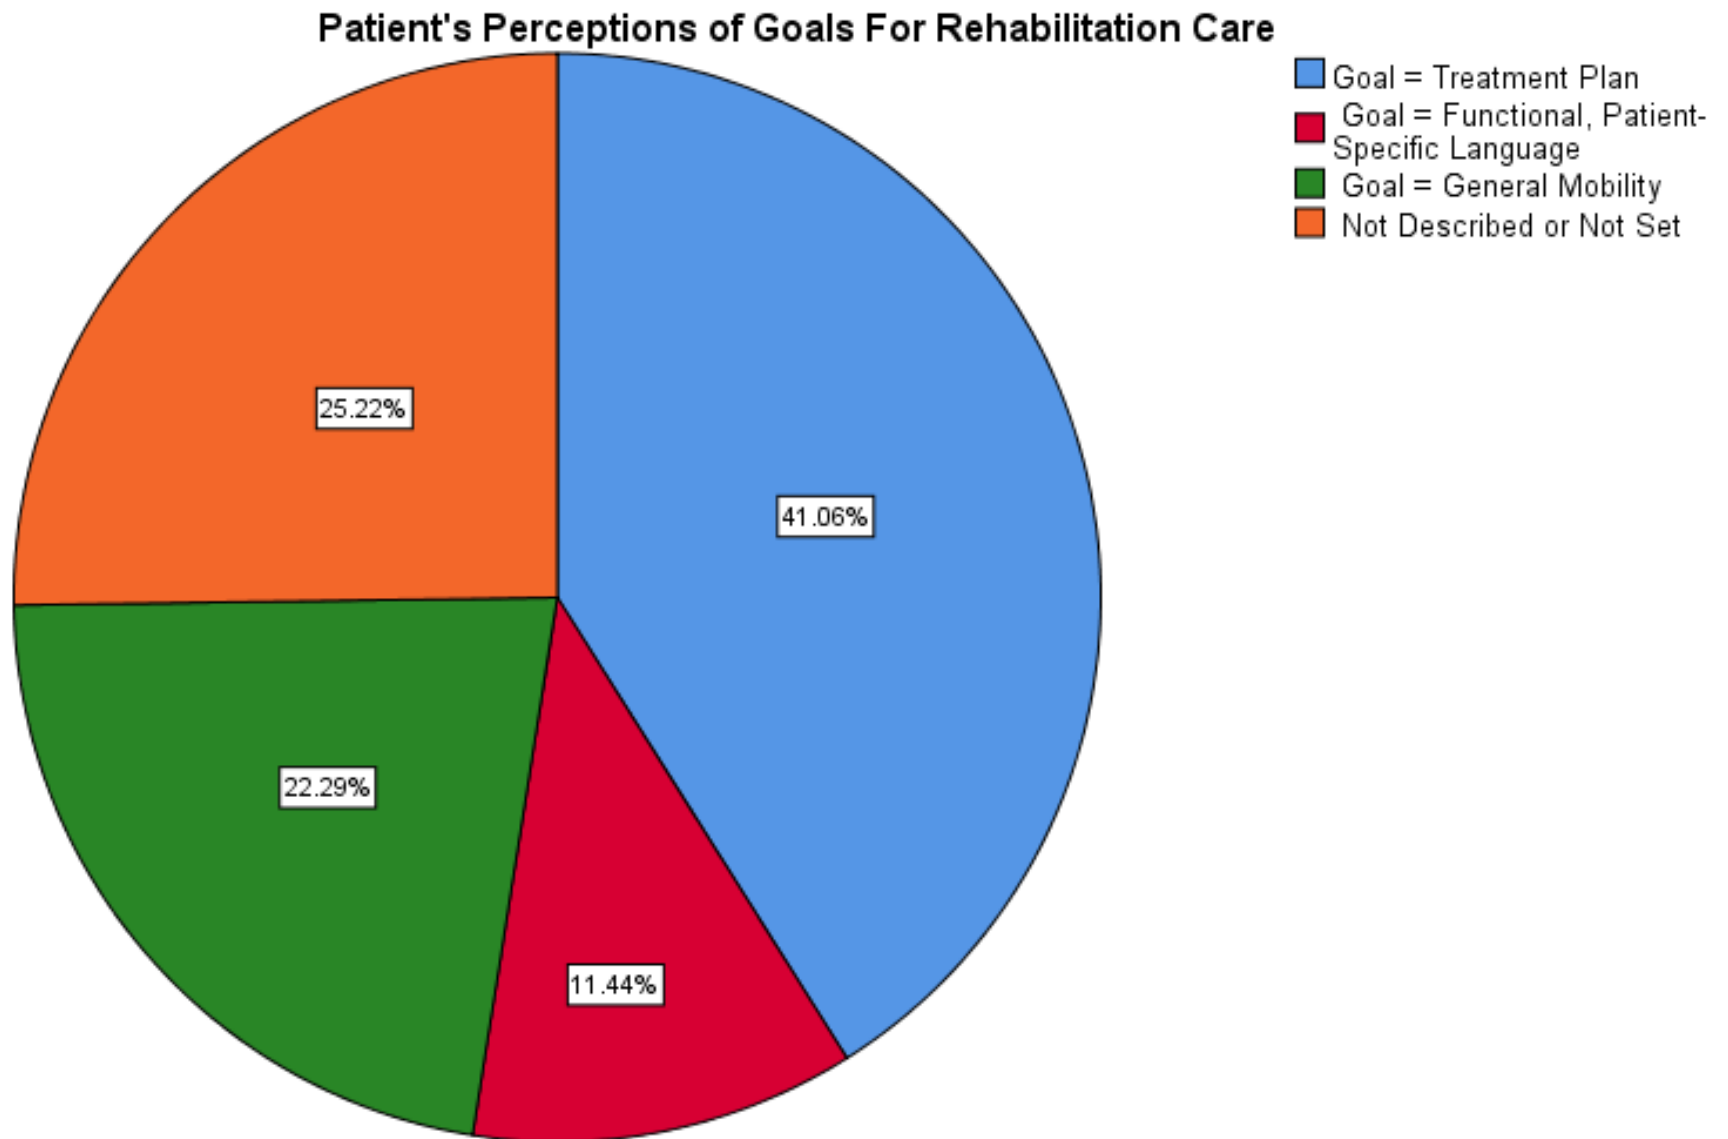

**Figure 6.** Patient Ratings of Experience on Individual WatLX™ Items

WatLX Responses at 3-Month Follow-Up

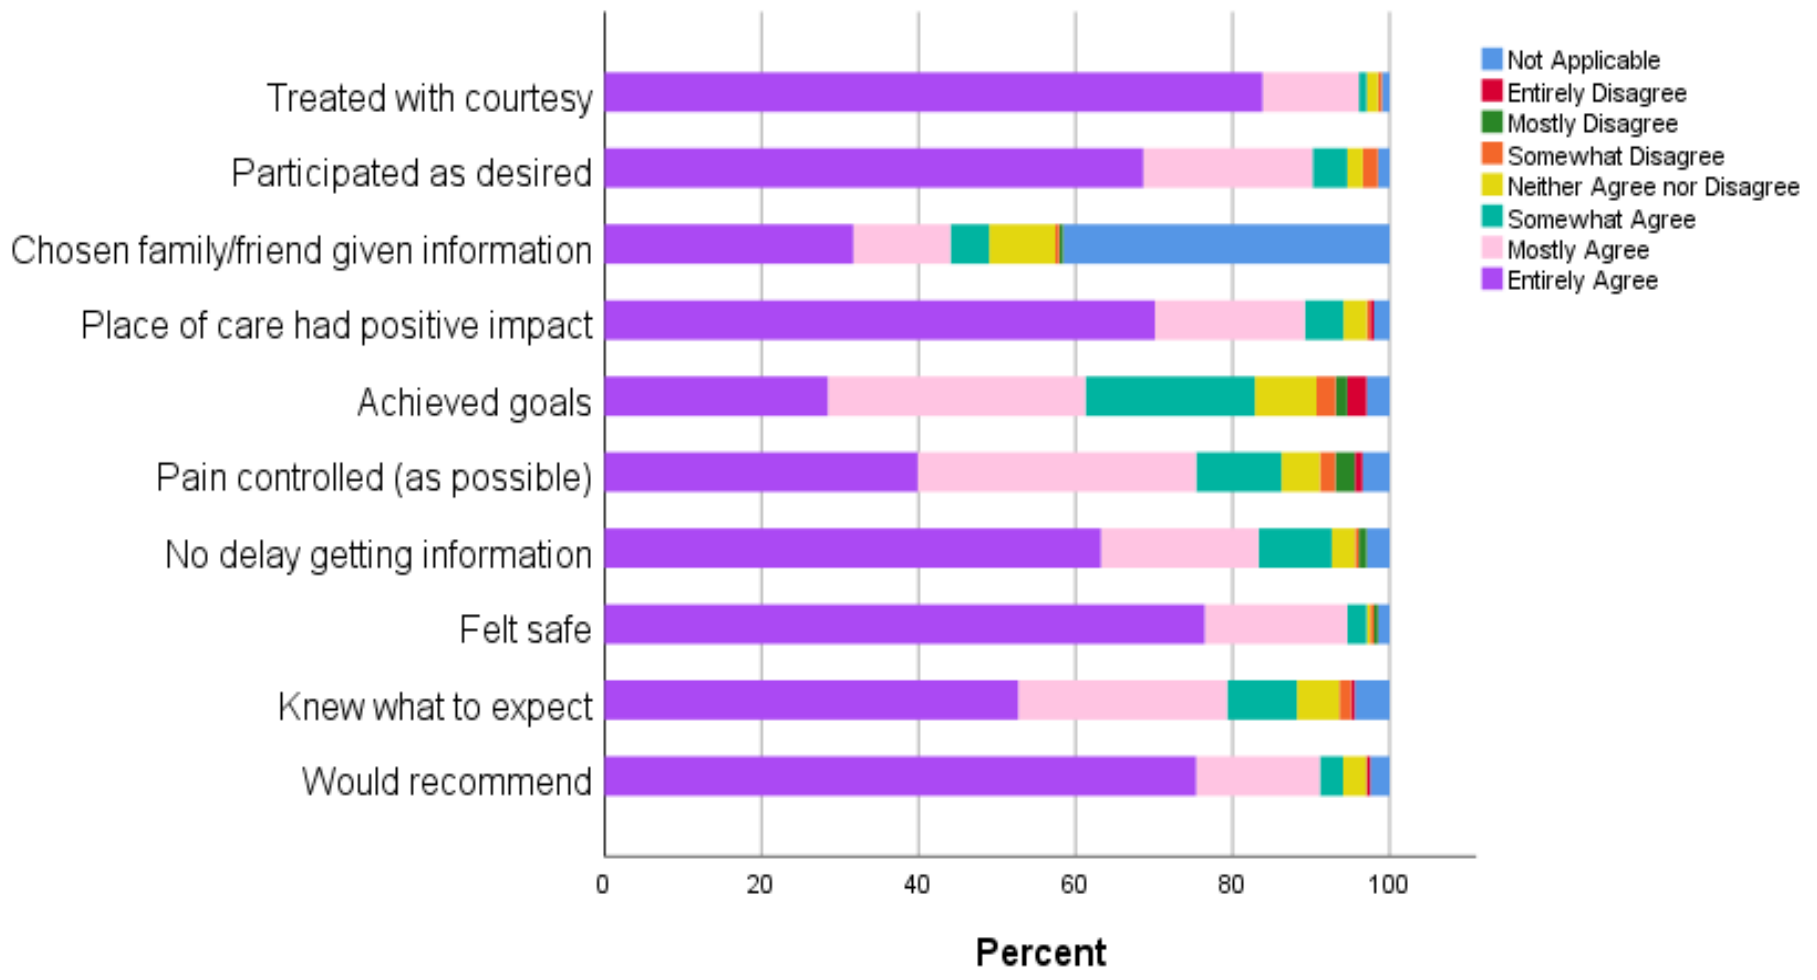

# Reporting checklist for cohort study.

Based on the STROBE cohort guidelines.

## Instructions to authors

Complete this checklist by entering the page numbers from your manuscript where readers will find each of the items listed below.

Your article may not currently address all the items on the checklist. Please modify your text to include the missing information. If you are certain that an item does not apply, please write "n/a" and provide a short explanation.

Upload your completed checklist as an extra file when you submit to a journal.

In your methods section, say that you used the STROBE cohort reporting guidelines, and cite them as:

von Elm E, Altman DG, Egger M, Pocock SJ, Gøtzsche PC, Vandenbroucke JP. The Strengthening of Reporting of Observational Studies in Epidemiology (STROBE) Statement: guidelines for reporting observational studies.

|                           |                     |                                                                                                 | Page Number |
|---------------------------|---------------------|-------------------------------------------------------------------------------------------------|-------------|
| <b>Title and abstract</b> |                     |                                                                                                 |             |
| Title                     | <a href="#">#1a</a> | Indicate the study's design with a commonly used term in the title or the abstract              | 1           |
| Abstract                  | <a href="#">#1b</a> | Provide in the abstract an informative and balanced summary of what was done and what was found | 1           |
| <b>Introduction</b>       |                     |                                                                                                 |             |
| Background / rationale    | <a href="#">#2</a>  | Explain the scientific background and rationale for the investigation being reported            | 3           |
| Objectives                | <a href="#">#3</a>  | State specific objectives, including any prespecified hypotheses                                | 4           |
| <b>Methods</b>            |                     |                                                                                                 |             |

|    |                      |                      |                                                                 |     |
|----|----------------------|----------------------|-----------------------------------------------------------------|-----|
| 1  | Study design         | <a href="#">#4</a>   | Present key elements of study design early in the paper         | 4   |
| 2  |                      |                      |                                                                 |     |
| 3  | Setting              | <a href="#">#5</a>   | Describe the setting, locations, and relevant dates, including  | 5   |
| 4  |                      |                      | periods of recruitment, exposure, follow-up, and data           |     |
| 5  |                      |                      | collection                                                      |     |
| 6  |                      |                      |                                                                 |     |
| 7  |                      |                      |                                                                 |     |
| 8  | Eligibility criteria | <a href="#">#6a</a>  | Give the eligibility criteria, and the sources and methods of   | 5   |
| 9  |                      |                      | selection of participants. Describe methods of follow-up.       |     |
| 10 |                      |                      |                                                                 |     |
| 11 |                      |                      |                                                                 |     |
| 12 | Eligibility criteria | <a href="#">#6b</a>  | For matched studies, give matching criteria and number of       | n/a |
| 13 |                      |                      | exposed and unexposed                                           |     |
| 14 |                      |                      |                                                                 |     |
| 15 |                      |                      |                                                                 |     |
| 16 | Variables            | <a href="#">#7</a>   | Clearly define all outcomes, exposures, predictors, potential   | 5   |
| 17 |                      |                      | confounders, and effect modifiers. Give diagnostic criteria, if |     |
| 18 |                      |                      | applicable                                                      |     |
| 19 |                      |                      |                                                                 |     |
| 20 |                      |                      |                                                                 |     |
| 21 | Data sources /       | <a href="#">#8</a>   | For each variable of interest give sources of data and details  | 5   |
| 22 | measurement          |                      | of methods of assessment (measurement). Describe                |     |
| 23 |                      |                      | comparability of assessment methods if there is more than       |     |
| 24 |                      |                      | one group. Give information separately for for exposed and      |     |
| 25 |                      |                      | unexposed groups if applicable.                                 |     |
| 26 |                      |                      |                                                                 |     |
| 27 |                      |                      |                                                                 |     |
| 28 |                      |                      |                                                                 |     |
| 29 |                      |                      |                                                                 |     |
| 30 | Bias                 | <a href="#">#9</a>   | Describe any efforts to address potential sources of bias       | 13  |
| 31 |                      |                      |                                                                 |     |
| 32 | Study size           | <a href="#">#10</a>  | Explain how the study size was arrived at                       | 5   |
| 33 |                      |                      |                                                                 |     |
| 34 | Quantitative         | <a href="#">#11</a>  | Explain how quantitative variables were handled in the          | 7   |
| 35 | variables            |                      | analyses. If applicable, describe which groupings were          |     |
| 36 |                      |                      | chosen, and why                                                 |     |
| 37 |                      |                      |                                                                 |     |
| 38 |                      |                      |                                                                 |     |
| 39 |                      |                      |                                                                 |     |
| 40 | Statistical          | <a href="#">#12a</a> | Describe all statistical methods, including those used to       | 7   |
| 41 | methods              |                      | control for confounding                                         |     |
| 42 |                      |                      |                                                                 |     |
| 43 |                      |                      |                                                                 |     |
| 44 | Statistical          | <a href="#">#12b</a> | Describe any methods used to examine subgroups and              | 7   |
| 45 | methods              |                      | interactions                                                    |     |
| 46 |                      |                      |                                                                 |     |
| 47 |                      |                      |                                                                 |     |
| 48 | Statistical          | <a href="#">#12c</a> | Explain how missing data were addressed                         | 7   |
| 49 | methods              |                      |                                                                 |     |
| 50 |                      |                      |                                                                 |     |
| 51 | Statistical          | <a href="#">#12d</a> | If applicable, explain how loss to follow-up was addressed      | 7   |
| 52 | methods              |                      |                                                                 |     |
| 53 |                      |                      |                                                                 |     |
| 54 |                      |                      |                                                                 |     |
| 55 | Statistical          | <a href="#">#12e</a> | Describe any sensitivity analyses                               | n/a |
| 56 | methods              |                      |                                                                 |     |
| 57 |                      |                      |                                                                 |     |
| 58 |                      |                      |                                                                 |     |
| 59 |                      |                      |                                                                 |     |
| 60 |                      |                      |                                                                 |     |

## Results

|    |                   |                      |                                                                       |
|----|-------------------|----------------------|-----------------------------------------------------------------------|
| 1  |                   |                      |                                                                       |
| 2  |                   |                      |                                                                       |
| 3  | Participants      | <a href="#">#13a</a> | Report numbers of individuals at each stage of study—eg 7             |
| 4  |                   |                      |                                                                       |
| 5  |                   |                      | numbers potentially eligible, examined for eligibility,               |
| 6  |                   |                      | confirmed eligible, included in the study, completing follow-         |
| 7  |                   |                      | up, and analysed. Give information separately for for                 |
| 8  |                   |                      | exposed and unexposed groups if applicable.                           |
| 9  |                   |                      |                                                                       |
| 10 |                   |                      |                                                                       |
| 11 | Participants      | <a href="#">#13b</a> | Give reasons for non-participation at each stage 7                    |
| 12 |                   |                      |                                                                       |
| 13 | Participants      | <a href="#">#13c</a> | Consider use of a flow diagram n/a                                    |
| 14 |                   |                      |                                                                       |
| 15 |                   |                      |                                                                       |
| 16 | Descriptive data  | <a href="#">#14a</a> | Give characteristics of study participants (eg demographic, 8         |
| 17 |                   |                      | clinical, social) and information on exposures and potential          |
| 18 |                   |                      | confounders. Give information separately for exposed and              |
| 19 |                   |                      | unexposed groups if applicable.                                       |
| 20 |                   |                      |                                                                       |
| 21 |                   |                      |                                                                       |
| 22 |                   |                      |                                                                       |
| 23 | Descriptive data  | <a href="#">#14b</a> | Indicate number of participants with missing data for each 8-11,      |
| 24 |                   |                      | variable of interest Tables                                           |
| 25 |                   |                      |                                                                       |
| 26 |                   |                      |                                                                       |
| 27 | Descriptive data  | <a href="#">#14c</a> | Summarise follow-up time (eg, average and total amount) 6             |
| 28 |                   |                      |                                                                       |
| 29 | Outcome data      | <a href="#">#15</a>  | Report numbers of outcome events or summary measures 8-11,            |
| 30 |                   |                      | over time. Give information separately for exposed and Tables         |
| 31 |                   |                      | unexposed groups if applicable.                                       |
| 32 |                   |                      |                                                                       |
| 33 |                   |                      |                                                                       |
| 34 | Main results      | <a href="#">#16a</a> | Give unadjusted estimates and, if applicable, confounder- 8-11,       |
| 35 |                   |                      | adjusted estimates and their precision (eg, 95% confidence Tables     |
| 36 |                   |                      | interval). Make clear which confounders were adjusted for             |
| 37 |                   |                      | and why they were included                                            |
| 38 |                   |                      |                                                                       |
| 39 |                   |                      |                                                                       |
| 40 |                   |                      |                                                                       |
| 41 | Main results      | <a href="#">#16b</a> | Report category boundaries when continuous variables were 8-11,       |
| 42 |                   |                      | categorized Tables                                                    |
| 43 |                   |                      |                                                                       |
| 44 |                   |                      |                                                                       |
| 45 | Main results      | <a href="#">#16c</a> | If relevant, consider translating estimates of relative risk into n/a |
| 46 |                   |                      | absolute risk for a meaningful time period                            |
| 47 |                   |                      |                                                                       |
| 48 |                   |                      |                                                                       |
| 49 | Other analyses    | <a href="#">#17</a>  | Report other analyses done—e.g., analyses of subgroups 7              |
| 50 |                   |                      | and interactions, and sensitivity analyses                            |
| 51 |                   |                      |                                                                       |
| 52 |                   |                      |                                                                       |
| 53 | <b>Discussion</b> |                      |                                                                       |
| 54 |                   |                      |                                                                       |
| 55 | Key results       | <a href="#">#18</a>  | Summarise key results with reference to study objectives 11-12        |
| 56 |                   |                      |                                                                       |
| 57 |                   |                      |                                                                       |
| 58 |                   |                      |                                                                       |
| 59 |                   |                      |                                                                       |
| 60 |                   |                      |                                                                       |

|    |                    |                     |                                                                |       |
|----|--------------------|---------------------|----------------------------------------------------------------|-------|
| 1  | Limitations        | <a href="#">#19</a> | Discuss limitations of the study, taking into account sources  | 13-14 |
| 2  |                    |                     | of potential bias or imprecision. Discuss both direction and   |       |
| 3  |                    |                     | magnitude of any potential bias.                               |       |
| 4  |                    |                     |                                                                |       |
| 5  |                    |                     |                                                                |       |
| 6  | Interpretation     | <a href="#">#20</a> | Give a cautious overall interpretation considering objectives, | 12-13 |
| 7  |                    |                     | limitations, multiplicity of analyses, results from similar    |       |
| 8  |                    |                     | studies, and other relevant evidence.                          |       |
| 9  |                    |                     |                                                                |       |
| 10 |                    |                     |                                                                |       |
| 11 | Generalisability   | <a href="#">#21</a> | Discuss the generalisability (external validity) of the study  | 13    |
| 12 |                    |                     | results                                                        |       |
| 13 |                    |                     |                                                                |       |
| 14 |                    |                     |                                                                |       |
| 15 | <b>Other</b>       |                     |                                                                |       |
| 16 | <b>Information</b> |                     |                                                                |       |
| 17 |                    |                     |                                                                |       |
| 18 |                    |                     |                                                                |       |
| 19 | Funding            | <a href="#">#22</a> | Give the source of funding and the role of the funders for the | 16    |
| 20 |                    |                     | present study and, if applicable, for the original study on    |       |
| 21 |                    |                     | which the present article is based                             |       |
| 22 |                    |                     |                                                                |       |
| 23 |                    |                     |                                                                |       |

24 None The STROBE checklist is distributed under the terms of the Creative Commons Attribution  
25 License CC-BY. This checklist can be completed online using <https://www.goodreports.org/>, a tool  
26 made by the [EQUATOR Network](#) in collaboration with [Penelope.ai](#)  
27  
28  
29  
30  
31  
32  
33  
34  
35  
36  
37  
38  
39  
40  
41  
42  
43  
44  
45  
46  
47  
48  
49  
50  
51  
52  
53  
54  
55  
56  
57  
58  
59  
60



# BMJ Open

## Measuring Shared Decision-Making and Collaborative Goal Setting in Community Rehabilitation: A Focused Ethnography Using Cross-Sectional Surveys in Canada

|                                 |                                                                                                                                                                                                                                                                                                                                                              |
|---------------------------------|--------------------------------------------------------------------------------------------------------------------------------------------------------------------------------------------------------------------------------------------------------------------------------------------------------------------------------------------------------------|
| Journal:                        | <i>BMJ Open</i>                                                                                                                                                                                                                                                                                                                                              |
| Manuscript ID                   | bmjopen-2019-034745.R2                                                                                                                                                                                                                                                                                                                                       |
| Article Type:                   | Original research                                                                                                                                                                                                                                                                                                                                            |
| Date Submitted by the Author:   | 04-Jun-2020                                                                                                                                                                                                                                                                                                                                                  |
| Complete List of Authors:       | Manhas, Kiran; Alberta Health Services, Strategic Clinical Networks<br>Olson, Karin; University of Alberta, Faculty of Nursing<br>Churchill, Katie; Alberta Health Services, Health Professions, Strategy & Practice<br>Faris, Peter; Alberta Health Services<br>Vohra, Sunita; University of Alberta, Pediatrics<br>Wasylak, Tracy; Alberta Health Services |
| <b>Primary Subject Heading</b>: | Rehabilitation medicine                                                                                                                                                                                                                                                                                                                                      |
| Secondary Subject Heading:      | Health services research, Health policy, Ethics                                                                                                                                                                                                                                                                                                              |
| Keywords:                       | REHABILITATION MEDICINE, MEDICAL ETHICS, HEALTH SERVICES ADMINISTRATION & MANAGEMENT, Quality in health care < HEALTH SERVICES ADMINISTRATION & MANAGEMENT, ETHICS (see Medical Ethics)                                                                                                                                                                      |
|                                 |                                                                                                                                                                                                                                                                                                                                                              |

SCHOLARONE™  
Manuscripts



I, the Submitting Author has the right to grant and does grant on behalf of all authors of the Work (as defined in the below author licence), an exclusive licence and/or a non-exclusive licence for contributions from authors who are: i) UK Crown employees; ii) where BMJ has agreed a CC-BY licence shall apply, and/or iii) in accordance with the terms applicable for US Federal Government officers or employees acting as part of their official duties; on a worldwide, perpetual, irrevocable, royalty-free basis to BMJ Publishing Group Ltd ("BMJ") its licensees and where the relevant Journal is co-owned by BMJ to the co-owners of the Journal, to publish the Work in this journal and any other BMJ products and to exploit all rights, as set out in our [licence](#).

The Submitting Author accepts and understands that any supply made under these terms is made by BMJ to the Submitting Author unless you are acting as an employee on behalf of your employer or a postgraduate student of an affiliated institution which is paying any applicable article publishing charge ("APC") for Open Access articles. Where the Submitting Author wishes to make the Work available on an Open Access basis (and intends to pay the relevant APC), the terms of reuse of such Open Access shall be governed by a Creative Commons licence – details of these licences and which [Creative Commons](#) licence will apply to this Work are set out in our licence referred to above.

Other than as permitted in any relevant BMJ Author's Self Archiving Policies, I confirm this Work has not been accepted for publication elsewhere, is not being considered for publication elsewhere and does not duplicate material already published. I confirm all authors consent to publication of this Work and authorise the granting of this licence.

1  
2  
3 **Journal:** *BMJ Open*  
4  
5

6 **Title:** Measuring Shared Decision-Making and Collaborative Goal-Setting in  
7  
8 Community Rehabilitation: A Focused Ethnography Using Cross-Sectional Surveys in  
9  
10 Canada  
11

12  
13 **Authors:**  
14

15  
16 Kiran Pohar Manhas<sup>a,b,\*</sup>, Karin Olson<sup>b,c</sup>, Katie Churchill<sup>a,d,e</sup>, Peter Faris<sup>a</sup>, Sunita  
17  
18 Vohra<sup>b,f</sup>, and Tracy Wasylak<sup>a,g</sup>  
19

20  
21 <sup>a</sup> Alberta Health Services, Calgary, Canada ([Kiran.poharmanhas@ahs.ca](mailto:Kiran.poharmanhas@ahs.ca))  
22

23  
24 <sup>b</sup> Integrative Health Institute, University of Alberta, Edmonton, Canada  
25

26  
27 <sup>c</sup> Faculty of Nursing, University of Alberta, Edmonton, Canada  
28  
29 ([karin.olson@ualberta.ca](mailto:karin.olson@ualberta.ca))  
30

31  
32 <sup>d</sup> Department of Clinical Neurosciences, Cumming School of Medicine, University of  
33  
34 Calgary, Calgary, Canada ([Katie.churchill@ahs.ca](mailto:Katie.churchill@ahs.ca))  
35

36  
37 <sup>e</sup> Department of Occupational Therapy, University of Alberta, Edmonton, Canada  
38

39  
40 <sup>f</sup> Departments of Pediatrics and Psychiatry, Faculty of Medicine & Dentistry,  
41  
42 University of Alberta, Edmonton, Canada ([svohra@ualberta.ca](mailto:svohra@ualberta.ca))  
43

44  
45 <sup>g</sup> Faculty of Nursing, University of Calgary, Calgary, Canada ([tracy.wasylak@ahs.ca](mailto:tracy.wasylak@ahs.ca))  
46

47  
48 \*Corresponding Author contact information:  
49

50  
51 Kiran Pohar Manhas  
52  
53 c/o Strategic Clinical Networks™  
54  
55 Alberta Health Services  
56

1  
2  
3 Southport Tower, 10301 Southport Lane SW  
4 Calgary, Alberta T2W 1S7  
5  
6 Tel: 587-774-7734  
7  
8 Fax: unavailable  
9  
10 Email: [kiran.poharmanhas@ahs.ca](mailto:kiran.poharmanhas@ahs.ca)  
11  
12

13 **Manuscript Word Count: 4427**  
14

15  
16   
17 **ABSTRACT** (250 words)  
18  
19

20 **Objective:** To describe and measure the shared decision-making (SDM) experience,  
21 including goal-setting experiences, from the perspective of patients and providers in  
22 diverse community-rehabilitation settings.  
23  
24

25  
26  
27 **Design:** Prospective, longitudinal surveys  
28  
29

30 **Setting:** 13 primary level-of-care community-rehabilitation sites in diverse areas  
31 varying in geography, patient population, and provider discipline  
32  
33

34  
35 **Subjects:** 341 adult, English-speaking patient-participants, and 66 provider-  
36 participants  
37  
38

39  
40 **Measures:** ASK-MI (dyadic tool measuring SDM), WatLX™ (outpatient rehabilitation  
41 experience), and demographic questionnaire. Survey packages distributed at two time-  
42 points (T0=recruitment; T1=3-months-later)  
43  
44

45  
46 **Results:** We found that amongst 341 patient-provider dyads, 26.4% agreed that the  
47 appointment at recruitment involved high-quality SDM. Patient perceptions of goal-  
48 setting suggested that 19.6% of patients did not set a goal for their care, and only 11.4%  
49 set goals in functional language that tied directly to an activity/role/responsibility that  
50 was meaningful to their life. Better SDM was clinically associated with higher total  
51 family income (p=0.045).  
52  
53  
54  
55  
56  
57  
58  
59  
60

1  
2  
3 **Conclusions:** These findings provide evidence for the importance of SDM and goal-  
4 setting in community rehabilitation. Among patients, lower ratings of SDM  
5 corresponded with less recognition of their preferences. Actionable strategies include  
6 supporting financially-vulnerable patients in realizing SDM through training of  
7 providers to make extra space for such patients to share their preferences and better  
8 preparing patients to articulate their preferences. We recommend more research into  
9 strategies that advance highly-functional goal-setting with patients, and that lessen  
10 survey ceiling effects.  
11  
12  
13  
14  
15  
16

### 17 **Article Summary: Strengths and limitations of the study**

- 19 • One strength is that this study has a significant sample size, with 341 patient  
20 participants completing surveys.
- 21 • Another strength is that participant diversity allows for statistically-appropriate  
22 comparisons based on geography, level of privacy, patient demographics, and  
23 provider training.
- 24 • Study limitations include that the survey measuring shared decision-making is  
25 novel, has a floor effect, and may be subject to acquiescence and social desirability  
26 biases.  
27  
28  
29  
30  
31  
32  
33

34 **Keywords:** shared decision-making, community, rehabilitation, patient perspectives,  
35 provider perspectives, survey, goal-setting  
36  
37  
38  
39  
40  
41  
42  
43  
44  
45  
46  
47  
48  
49  
50  
51  
52  
53  
54  
55  
56  
57  
58  
59  
60

## Introduction

Many public policies aim to better empower patients in their health and healthcare, [1–7]. Patient-centred care, which emphasizes shared decision-making (SDM) and patient engagement, is one strategy to empower patients [5]. SDM is an interpersonal decision-making process where provider(s) and patient make treatment choices collaboratively using best available evidence, patient values and preferences [8, 9].

SDM meets an ethical imperative to enable patient autonomy [10, 11]. Research suggests that SDM increases patient knowledge and satisfaction [12–14], enhances realization of treatment goals [15], moderately reduces inappropriate service utilization [16], and improves patient-reported outcomes [12, 17]. SDM is neither routinely utilized nor taught in healthcare [11, 18, 19].

SDM is multi-faceted [20]. Based on a systematic review (n=418 studies), Makoul & Clayman (2006) describe an SDM model with nine essential elements: problem-definition; presenting and discussing options; discussing patient values and abilities; discussing provider knowledge; clarifying understanding; decision-making; and arranging follow-up. This SDM model overlaps with conceptualizations, and practices, of collaborative goal-setting in rehabilitation [21, 22].

SDM literature emphasizes patient-physician interactions. Less research examines the impacts of SDM on other professionals, teams and organizations [10]; on the appropriate policy types for building SDM capacity within organizations [9]; and on SDM in rehabilitation involving primarily allied-health providers [21]. Authors of a narrative synthesis (n=15 studies) revealed that in-patient rehabilitation goal-setting did not permit patient input, was overly-controlled by staff, and involved parties lacking knowledge about SDM [21]. Five further studies evaluated a “train-the-trainer” program to promote SDM in inpatient rehabilitation using focus groups, surveys and a cluster-randomized controlled study, but did not fully elaborate the SDM experience in rehabilitation [23–27]. Other research theorizes on SDM in rehabilitation, positing on technology, ethics and collaboration [28–32]. The transferability of these findings to community contexts is unclear [21]. Inpatient and outpatient needs and resources vary, impacting communication and care [33, 34].

The measurement of SDM-related constructs remains challenging [35–37]. A plethora of SDM definitions contributed to many different SDM measurement tools being developed [35, 38, 39]. No universally-accepted standard outcome or experience

1  
2  
3 measure exists to assess SDM [35], particularly for non-physician interactions. A 2015  
4 review found that only four of 13 SDM tools involved patients during their development  
5 [37], bringing into question content validity. Potentially inaccurate presumptions remain  
6 that patients are aware of ‘decision points’ and that only one decision point exists per  
7 consult [37].  
8  
9  
10

11 While the OPTION GRID is a commonly-used tool to measure SDM [40, 41], its use  
12 of a third-party observer is not universally feasible in resource-constrained healthcare  
13 settings (as in our study context). Qualitative research by team members revealed  
14 challenges with a previously-published SDM tool (SDM-Q-9) in primary care and mental  
15 health settings [42]. Challenges included inability to capture the SDM phase when  
16 problems are discussed and prioritized; the lack of a “not applicable” option; an over-  
17 emphasis on medical conditions; a lack of relevance for non-pharmacological  
18 interventions; and, the lack of recognition that SDM is valuable in goal-setting,  
19 investigations, as well as (as opposed to exclusively for) exploring treatment options [43].  
20  
21  
22  
23  
24  
25

26 In this context, the provincial health system sought to understand the experience of  
27 shared decision-making and collaborative goal-setting at diverse community  
28 rehabilitation sites across the province. This health system is the longest-running  
29 provincial health system in Canada and serves more than 4 million people. This work  
30 would form the baseline data to eventually evaluate the implementation of a novel model  
31 of care seeking to promote patient centred-care and collaborative goal-setting in  
32 community rehabilitation. In this study, for patients and providers of diverse  
33 community-rehabilitation sites across a single province in an industrialized country, we  
34 aimed to:  
35  
36  
37  
38  
39

- 40 (a) measure the prevalence of high-quality SDM experiences (compared to less than high  
41 quality SDM experiences);
- 42 (b) measure goal-setting perceptions by patients;
- 43 (c) determine any associations between SDM experience or goal-setting perceptions and  
44 demographic and contextual factors (e.g. geography, patient and provider age,  
45 gender, discipline).  
46  
47  
48  
49

50 This study included a small pilot feasibility study in this population to understand the  
51 reliability of the SDM tool and recruitment logistics. This study complements another  
52 in this population that used qualitative interviews to explore SDM experiences [42]. The  
53  
54  
55  
56  
57  
58  
59  
60

1  
2  
3 research team included two patient-co-investigators who consulted on the research  
4 design, implementation and results dissemination.  
5  
6  
7  
8

## 9 **Methods**

10  
11 We used focused ethnography in this research program [44]. Ethnography involves  
12 making cultural inferences “(1) from what people say; (2) from the way people act; and  
13 (3) from the artifacts people use” [45]. We focused on the communities of patients and  
14 professionals composing diverse community-rehabilitation sites across a provincial  
15 geography. Focused ethnography features a problem-focused and context-specific  
16 approach; a focus on a discrete phenomenon; the conceptual orientation of a single  
17 researcher; involvement of limited participants; episodic participant observation;  
18 participants with specific knowledge; and an emphasis on academic and healthcare  
19 settings [46, 47]. We met all criteria save participant observation due to feasibility  
20 constraints. While this paper emphasizes the survey findings, this paper is part of a  
21 broader study that included qualitative interviews, focus groups, and patient-led data  
22 collection [42]. Together, this research program followed an ethnographic methodology  
23 that underpinned its theoretical approach to data collection and analysis, which carried  
24 into this survey work equally. The surveys allowed a population-level perspective to  
25 inform the in-depth qualitative work [43].  
26  
27  
28  
29  
30  
31  
32  
33  
34

### 35 Participant Population

36  
37 We captured diverse rehabilitation settings that saw outpatients including both  
38 public and private provider sites, as well as three geographic types (rural (population <  
39 10000), regional-urban (population between 10000 and 100000), and metropolitan-  
40 urban (where population > 100000)).  
41  
42

43  
44 Participants included current patients and providers visiting and working,  
45 respectively, at study sites. Provider inclusion criterion was employment at the site at  
46 recruitment. Providers included allied-health professionals who were members of the  
47 rehabilitation team (e.g. physical therapists, occupational therapists, speech-language  
48 pathologists). Patient inclusion criteria included  $\geq 18$  years of age; their provider was  
49 participating; able to consent without proxy; and can understand and speak English.  
50  
51  
52  
53 There were no exclusion criteria.

### 54 Recruitment



1  
2  
3 Site leadership informed provider recruitment. Tactics included email introductions  
4 followed by study presentations (by webinar, in-person, or one-on-one). After  
5 discussions, informed consent was procured.  
6  
7

8 Convenience sampling directed patient recruitment. Management identified onsite  
9 recruiters from clerical and therapy-assistant staff. Researchers trained recruiters to  
10 identify eligible patients, discuss participation, and record those patients accepting  
11 take-home study packages. While provider-participants may have mentioned the study  
12 to patients, only onsite recruiters distributed surveys. Recruitment was bounded by a  
13 four-week site maximum and a 20-patient limit per provider to minimize site and  
14 provider burden. Patient consent was implied by the mailed return of surveys; written  
15 consent was required for future data sharing and future research contact.  
16  
17  
18  
19  
20

### 21 Data Collection

22 We used validated surveys to measure SDM, goal-setting, quality of life and patient  
23 experience: at baseline (T0) we captured SDM (ASK-MI tool), perceptions on goal-setting,  
24 quality of life, demographic and contextual data; at 3-months post-baseline (T1) we  
25 captured quality of life and overall patient-reported rehabilitation experience (WatLX™  
26 survey). The patient demographic and contextual data captured self-reported age,  
27 gender, education, income, medical conditions, and their perceptions of their health  
28 journey (i.e. where they were in their rehabilitation, whether they perceived a goal was  
29 set for their rehabilitation, and if so what that goal was). The provider demographic and  
30 contextual data included self-reported age, gender, professional discipline, years of  
31 experience. Providers were also asked if they completed the HealthChange®  
32 Methodology workshop through their organization, which aims to educate providers in  
33 helping patients make the behaviour changes needed to promote health; such training  
34 impacts provider-patient interactions and could impact SDM as patient-centred  
35 communication is discussed [48]. Survey completion took 5-7 minutes per time-point.  
36  
37  
38  
39  
40  
41  
42  
43  
44

45 In a pilot feasibility study, we completed the following data collection strategies at  
46 two community rehabilitation sites with the modification that T1 would be at 6-weeks  
47 after recruitment (versus 3-months). The data collected was used to determine study  
48 logistics feasibility and the reliability of the ASK-MI results (via Cronbach's alpha  
49 determination).  
50  
51  
52

53 A novel, dyadic SDM tool was used given the infeasibility of using a 3<sup>rd</sup>-party  
54 reviewer, and the challenges in using the SDM-Q-9 in similar Alberta populations: the  
55  
56  
57  
58  
59  
60

1  
2  
3 Alberta Shared decision-making Measurement Instrument (ASK-MI) (Figure 1 is the  
4 patient version; provider version is same except language transposed to address  
5 provider). Using a 6-point Likert Scale (with not-applicable option), patients and  
6 providers independently describe the appointment experience from a SDM-process  
7 perspective. This process involves patients and providers agreeing on the main concern;  
8 working together to make a plan that considers patients' wishes; and, ensuring the  
9 provider confirms patient understanding and next steps. The ASK-MI was developed  
10 and piloted in primary care and mental health clinics in Alberta [43].

11  
12  
13  
14  
15  
16 The dyadic ASK-MI tool requires patient and provider to independently rate six facets  
17 of the SDM experience; lower numeric scores reflect higher quality SDM. Individual  
18 scores are summed; the two sum scores are compared to determine the final rating  
19 score: Excellent, Acceptable, or Unacceptable. When both patient and provider rate SDM  
20 highly, an Excellent rating score is reached. Disparity between parties would lead to a  
21 lower ASK-MI rating score. Full agreement on SDM Excellence equates to patient and  
22 provider both giving the best, lowest numeric score on each ASK-MI item. Using self-  
23 report, we collected contextual (e.g. group or individual appointment; were goals set with  
24 provider) and participant demographic data (e.g. age, gender, marital status).

25  
26  
27  
28  
29  
30  
31 The WatLX™ is a 2-page outpatient rehabilitation care patient experience survey  
32 meant for post-completion of rehabilitation care. The WatLX™ consists of 10 questions,  
33 where respondents can respond either not applicable or on a 7-point Likert scale.  
34 Psychometric testing of the WatLX™ involved 1174 cognitively-intact, English-speaking,  
35 adult outpatients who had completed a program of cardiac, musculoskeletal, neurologic,  
36 stroke, pulmonary, or speech language rehabilitative care in Ontario [49]. Reliability  
37 analyses compared the use of a 7-point to 5-point Likert scale in the WatLX™.  
38 Cronbach's alphas were 0.863 and 0.957 for the 5 and 7-point scale, and the ICC =  
39 0.827 and 0.880, respectively [49]. Generally, the higher the score, the more positive the  
40 patient experience. There is evidence of ceiling effects with the WatLX™.

41  
42  
43  
44  
45  
46  
47 The T0 take-home study package included a consent form and directions, the ASK-  
48 MI survey, a patient demographic form including their communication preference for  
49 the 3-month follow-up (T1) surveys (which included WatLX™). All envelopes were pre-  
50 addressed and stamped to support convenient, confidential return to the researchers.  
51 Patients were directed to complete the surveys within 24 hours, so their appointment  
52 was fresh in their mind.

1  
2  
3 When a patient took a study package, the recruiter logged the date, envelope  
4 number, patient's initials, and provider name. Daily, this recruitment information was  
5 sent to the lead researcher, who emailed the ASK-MI (provider version) tool to the named  
6 provider, along with the patient initials via personalized email link to REDCAP at the  
7 University of Alberta. Providers received one email per patient and had 48 hours to  
8 complete the survey.  
9

10  
11  
12 The second time-point (T1), for patients only, was exactly three months post-  
13 recruitment. T1 data collection was by mail or email per patient-participant preference.  
14 Participants received email or phone reminders 1-week prior to T1, and at 7-days post-  
15 T1.  
16  
17

18  
19 To ensure the accuracy of data entry of paper surveys, a randomly-selected 30% of  
20 the study sample was assessed at the close of data collection. If more than 10% of the  
21 data was incorrectly entered, then another random 30% of the study sample would have  
22 been checked. Errors were rectified immediately.  
23  
24

25  
26 At the close of data collection, the research team developed a coding rubric by  
27 consensus to capture the presence, and level, of function in the rehabilitation goals  
28 perceived by patient participants (as described in the self-reported patient  
29 sociodemographic form). Level of functionality was informed by the Alberta Health  
30 Services definition that the goal "consider[ed] the whole person – individual context,  
31 personal factors, and how a health condition impacts participation in life... work, school,  
32 play, relationships, roles and any activities that the person loves to do" [50]. A goal was  
33 functional, if it related to participation in a role, responsibility or activity important to  
34 the person; the language of the goal spoke to activity and participation in life not the  
35 rehabilitation treatment plan. A goal was not functional if it did not speak to such a  
36 role, responsibility or activity important to the person (e.g. language focused on the  
37 treatment plan or general alleviation of symptoms). While one researcher (KPM) coded  
38 all patient-participant self-reported perceptions, the team discussed and practiced the  
39 coding together to ensure consensus on approaches to described goals.  
40  
41  
42  
43  
44  
45  
46  
47  
48  
49

## 50 Data Analysis

51 After cleaning and coding the T0 and T1 data, we completed descriptive and  
52 exploratory analyses to address the research questions. The ASK-MI Score was  
53 collapsed into two different binary categorical variables: (a) Excellent versus  
54  
55  
56  
57  
58  
59

1  
2  
3 Acceptable/Unacceptable; and (b) Full Agreement on SDM Excellence versus Not Full  
4 Agreement on SDM Score. The secondary variable was overall rehabilitative care  
5 experience (WatLX™). Independent variables included age, gender, patient income  
6 range, geographical area, and other demographic and contextual variables.  
7  
8

9 The distribution of interval and ratio type survey data (e.g. age) was checked for  
10 whether it is normally distributed. Test selection was based upon the results of these  
11 analysis (e.g. non-normally-distributed data was analyzed using non-parametric tests).  
12 We analyzed the questionnaire data descriptively, with means, standard deviations,  
13 both overall in community rehabilitation and based on contextual differences. For  
14 categorical data, chi-square tests directed comparisons between high versus low quality  
15 SDM; sub-analyses using tests of proportions considered this ratio of experiences in  
16 different demographic and organizational settings based on the size and quality of  
17 independent variable data collected. For the three surveys, where missing data was less  
18 than 5% across population, then used the 20% as the threshold for missing items: if ≤  
19 20% items missing, then median response used in place of the missing item to then  
20 score the survey; if > 20% of items missing, then the entire record was deleted from the  
21 analysis [51]. Univariate correlations were studied between each independent variables  
22 (age, gender, income, geographical area, provider discipline) and the ASK-MI score. A  
23 binary regression was completed to ascertain the effects of training (i.e. HealthChange  
24 participation), level of privacy during appointment, geographical setting, and timing of  
25 appointment (relative to patient's rehabilitation care journey). This model used a  
26 binomial distribution with log link function to obtain relative risks. We used backward  
27 elimination with the Akaike Information Criterion (AIC) to reduce the model. At each  
28 step, the variables with the largest associated decrease in the AIC at removal was deleted  
29 from the model. The steps continued until the removal of remaining variable resulted in  
30 an increase in the AIC.  
31  
32  
33  
34  
35  
36  
37  
38  
39  
40  
41  
42  
43  
44  
45

## 46 **Results**

### 47 Pilot Feasibility Study Results

48 Phase 1 involved two community rehabilitation sites in an urban-metropolitan area  
49 in Alberta between March and May 2018 (n=24 patients and n=6 providers). The mean  
50 (range) participant age for patients and providers was 48.3 (22-71) and 37.4 (26-56)  
51  
52  
53  
54  
55  
56  
57  
58  
59  
60

years, respectively. Most participants were White (87.5% patients; 80% providers) and female (66.7% patients; 60% providers). Fifty percent of patient-participants were employed, while 20.8% were retired. Patient-participants' total family income varied with 37.5% being affluent ( $\geq$  \$150000) and a combined 20.8% being less affluent ( $<$ \$35000). On average (range), provider-participants had 12 (3-30) years of experience and worked 31.7 (10-70) hours weekly.

Because only four patients completed follow-up surveys that included the WatLX™, we only assessed the reliability of the EQ-5D-5L and ASK-MI surveys in this population. Table 1 describes the tools' means, standard deviations and internal consistency assessments using Cronbach's alpha. Given the small sample, the reliability of these measures appear appropriate and related to estimates during tool development [52]. Field notes support the validity of the EQ-5D-5L and ASK-MI tools for participants. The ASK-MI scores were clustered in the excellent range, which is common to many patient-reported experience measures. The ASK-MI was completed by 24 patient-provider dyads. The scores obtained from these dyads scoring the SDM experience as Excellent (70.8%), Acceptable (29.2%), or Unacceptable (0%). Because complementary studies by study co-authors detail the psychometric validity of the instrument, we do not present further findings in that regard (for details, please contact co-authors as the manuscript is under review).

| <b>Tool</b> | <b>Mean</b>                              | <b>Standard Deviation</b>               | <b>Internal Consistency Measurement Tool</b> | <b>Internal Consistency Measurement</b> |
|-------------|------------------------------------------|-----------------------------------------|----------------------------------------------|-----------------------------------------|
| ASK-MI      | 6.96 (patients)<br>10 (providers)        | 1.93 (patients)<br>4.07 (providers)     | Cronbach's Alpha                             | 0.82                                    |
| EQ-5D-5L    | 73.6% (VAS)<br>0.760 (EQ-5D Index score) | 13.7 (VAS)<br>0.104 (EQ-5D Index score) | Cronbach's Alpha                             | 0.648                                   |

**Table 1.** Internal Consistency of Surveys in Pilot Feasibility Study

### Participant Information (Full Study)

Thirteen community-rehabilitation sites distributed 606 take-home survey packages; 341 patients returned them and thus implied consent to participate (response rate 56.2%). At T1, 209 patients returned surveys (response rate 61.3%, the remainder lost to follow-up).

Table 2 describes the patient-participant population. The patient-participants' mean (SD) age was 57.5 (16.4) years. Most patient-participants were female (58.9%), married (68.9%), Caucasian (90.9%), had some post-secondary education (70.4%), were at a 1:1 appointment with providers (90.9%), were neither at the first nor last appointment at recruitment (66.9%), and were receiving physiotherapy (68.6%). Participants varied in where they received their care: 46.3% were in an open exercise area, 48.4% were in a private area (either behind a privacy curtain or in private room), and 3.8% described their area as unique. The demographic profile was similar between T0 and T1 patient-participants.

|                              | N (%)       |
|------------------------------|-------------|
| Patient Population           | 341 (100%)  |
| Mean Age in years (SD)       | 57.5 (16.4) |
| Missing                      | 3 (0.9%)    |
| Gender                       |             |
| Male                         | 138 (40.5%) |
| Female                       | 201 (58.9%) |
| Missing                      | 2 (0.6%)    |
| Marital Status               |             |
| Single                       | 48 (14.1%)  |
| Married (legal/common law)   | 235 (68.9%) |
| Separated or Divorced        | 32 (9.4%)   |
| Widowed                      | 21 (6.2%)   |
| Missing                      | 5 (1.5%)    |
| Geographical Location        |             |
| Metropolitan-Urban           | 145 (42.5%) |
| Regional-Urban               | 161 (47.2%) |
| Rural                        | 35 (10.3%)  |
| Education                    |             |
| High school diploma or less  | 96 (28.1%)  |
| Any post-secondary education | 240 (70.4%) |
| Missing                      | 5 (1.5%)    |
| Employment Status            |             |
| Employed                     | 141 (41.3%) |
| Unemployed                   | 61 (17.9%)  |
| Retired                      | 135 (39.6%) |
| Missing                      | 4 (1.2%)    |
| Ethnicity                    |             |

|                               |             |
|-------------------------------|-------------|
| European Origins              | 310 (90.9%) |
| Indigenous (e.g. Inuk, Métis) | 10 (2.9%)   |
| Non-European Origins          | 21 (6.2%)   |
| Supplementary Insurance       |             |
| Yes                           | 144 (42.2%) |
| No                            | 160 (46.9%) |
| Prefer not to answer          | 37 (10.9%)  |
| Total Family Income           |             |
| Less than \$59999             | 106 (31.1%) |
| \$60000 to 99999              | 75 (22.0%)  |
| \$100000 or More              | 78 (22.9%)  |
| Prefer not to answer          | 82 (24%)    |

**Table 2.** Patient-Participant Demographics

Table 3 describes the provider-participant population. The provider-participants' mean (SD) age was 41.8 (9.86) years. Experience-wise, providers had a mean (SD) of 15.1 (10.3) years of experience. Providers represented six rehabilitation disciplines, with physiotherapy (53.0%) and occupational therapy (19.7%) being most prevalent. Most providers were female (60.6%), Caucasian (60.6%), trained in Canada (66.7%), and had primarily clinical provider roles (vs. management) (71.2%).

| Provider Participant Characteristics | N (%) or Mean (SD) |
|--------------------------------------|--------------------|
| Population                           | 66                 |
| Age (years)                          | 41.83 (9.86)       |
| Missing                              | 13 (19.7%)         |
| Gender                               |                    |
| Male                                 | 13 (19.7%)         |
| Female                               | 40 (60.6%)         |
| Missing                              | 13 (19.7%)         |
| Provider Discipline                  |                    |
| Occupational Therapy                 | 13 (19.7%)         |
| Physiotherapy                        | 35 (53.0%)         |
| Other                                | 5 (7.5%)           |
| Missing                              | 13 (19.7%)         |
| Country of Training                  |                    |
| Canada                               | 44 (66.7%)         |
| Outside of Canada                    | 9 (13.6%)          |
| Missing                              | 13 (19.7%)         |
| Ethnicity                            |                    |
| European Ethnic Origins              | 40 (60.6%)         |
| Non-European Ethnic Origins          | 8 (12.1%)          |
| Missing                              | 18 (27.2%)         |
| Geographical Location                |                    |
| Metropolitan-Urban                   | 36 (54.5%)         |
| Regional-Urban                       | 24 (36.4%)         |
| Rural                                | 6 (9.1%)           |

**Table 3.** Provider-Participant Demographics

Table 4 describes the provider-participants' work settings. Providers worked a mean (SD) of 31.8 (9.0) hours/week in direct patient care, and saw a mean (SD) of 28.8 (17.6) patients per week. The outpatient clinical settings varied for providers, including community-based (31.8%) and hospital-based (45.5%) clinics. The clinical populations included at least 10 diverse populations, including general adults (25.8%), musculoskeletal (16.7%), and neurorehabilitation (13.6%). Providers were evenly split on participation in a person-centred behaviour-change course (HealthChange® Methodology [53]): 39.4% said they had taken it, 40.9% said they had not taken it, and 19.7% responses were missing herein. Of the providers who had taken HealthChange®, most providers perceived that it influenced their patient interactions to some degree (76.9%) (vs. to a great degree (15.4%)). The perceived influence of HealthChange® on site processes was less clear: 42.3% of providers saw no influence, while 53.8% saw some degree of influence.

| Provider Participant Characteristics           | N (%) or Mean (SD) |
|------------------------------------------------|--------------------|
| Setting                                        |                    |
| Community-Based Clinic                         | 21 (31.8%)         |
| Hospital, outpatient Clinic                    | 30 (45.5%)         |
| Primary Patient Population                     |                    |
| Complex Adults                                 | 2 (3.0%)           |
| Hand/Foot/Cardiac                              | 4 (6.0%)           |
| General Adults                                 | 17 (25.8%)         |
| Musculoskeletal (MSK)                          | 11 (16.7%)         |
| Neuro                                          | 9 (13.6%)          |
| Ortho/Surgery                                  | 3 (4.5%)           |
| Seniors                                        | 4 (6.1%)           |
| Missing                                        | 16 (24.2%)         |
| Average Waitlist (days) for Clinic             | 16.59 (17.59)      |
| Missing                                        | 18 (27.3%)         |
| HealthChange® Completion                       |                    |
| Yes                                            | 26 (39.4%)         |
| No                                             | 27 (40.9%)         |
| Missing                                        | 13 (19.7%)         |
| HealthChange® Influenced Patient Interactions? |                    |
| No Influence                                   | 1 (3.8%)           |
| To Some Degree                                 | 20 (76.9%)         |
| To a Great Degree                              | 4 (15.4%)          |
| Missing                                        | 1 (3.8%)           |



|                                          |            |
|------------------------------------------|------------|
| HealthChange® Influenced Site Processes? |            |
| No Influence                             | 11 (42.3%) |
| To Some Degree                           | 14 (53.8%) |
| To a Great Degree                        | 0 (0%)     |
| Missing                                  | 1 (3.8%)   |

**Table 4.** Provider-Participants' Clinical Setting

### SDM and Goal-Setting Prevalence in Community Rehabilitation

Using current ASK-MI scoring guidelines, 78.9% of T0 patient-provider appointments rated Excellent (Table 5). Given the evident floor effect of the ASK-MI (i.e. more than 15% of respondents have the lowest score, which is the best value [54]), the survey developers will re-assess the scoring algorithm [43].

| Shared Decision-Making Experience                                       | N (%) or Mean (SD) |
|-------------------------------------------------------------------------|--------------------|
| ASK-MI Score                                                            |                    |
| Excellent                                                               | 269 (78.9%)        |
| Acceptable                                                              | 37 (10.9%)         |
| Unacceptable                                                            | 2 (0.6%)           |
| Missing/Unable to Calculate                                             | 14 (4.1%)          |
| Patient and Provider had Full Agreement on SDM Excellence               |                    |
| Full Agreement                                                          | 90 (26.4%)         |
| Less Than Full Agreement                                                | 218 (63.9%)        |
| Missing/Unable to Determine                                             | 14 (4.1%)          |
| Was a Goal Set with Provider?                                           |                    |
| Yes                                                                     | 270 (79.2%)        |
| No                                                                      | 67 (19.6%)         |
| Missing                                                                 | 4 (1.2%)           |
| Level of Functionality of the Patient-Stated Goal                       |                    |
| Highly Functional, focused on everyday activity (i.e. patient language) | 39 (11.4%)         |
| Moderately Functional, focused on general mobility                      | 140 (41.1%)        |
| Not Functional, focused on treatment plan (i.e. provider language)      | 76 (22.3%)         |
| Not Applicable, no goal was set or goal not provided                    | 86 (25.2%)         |

**Table 5.** Prevalence of Shared Decision-Making and Goal-Setting

Looking at full agreement on SDM excellence or not, at T0, 26.4% of patient-provider encounters involved full agreement on SDM excellence. Figures 2 and 3 display the frequency of responses across the 6-item Likert scale for each ASK-MI question for patients and providers, respectively. These two graphs reveal that, across the six items, providers agreed less often about SDM excellence (i.e. relatively fewer responses at 'strongly agree').

For patients, there was less agreement that the patient and provider planned together to address the patient's preferences and that the plan considered the patient's wishes and abilities. Patients more often strongly agreed that the provider checked the patient's understanding of the plan and that there was agreement on the plan created.

For providers, there was less agreement that the patient and provider worked together to make a plan that addressed patient preferences. Providers more often strongly agreed that there was clarity and agreement on the visit's main focus; that the provider checked for patient understanding; and that the patient and provider agreed on the plan created.

Table 6 compares the three geographical settings on prevalence of high quality SDM (i.e. full agreement on SDM excellence) in patient-provider encounters, which demonstrates no statistically significant differences in the quality of SDM experiences between geographical areas: metropolitan areas (19.9%) and regional areas (33.8%) (p=0.068).

| Variable                                                | Geography                                  |                                 |                             | F statistic Value (df) | P-value |
|---------------------------------------------------------|--------------------------------------------|---------------------------------|-----------------------------|------------------------|---------|
|                                                         | Metropolitan Urban Mean (SD) [95% CI] OR % | Regional Urban Mean (SD) 95% CI | Rural Mean (SD) 95% CI      |                        |         |
| Patient Age                                             | 53.36 (17.29) [50.51-56.21]                | 61.08 (14.88) [58.74,63.41]     | 57.97 (15.14) [52.77-63.17] | 8.824 (df 2)           | < 0.001 |
| Months Knew Provider Before Recruitment                 | 8.40 (14.91) [5.54,11.26]                  | 24.64 (2.39) [5.03,14.52]       | 51.76 (63.95) [25.36-78.16] | 25.88                  | <0.001  |
| % Appointments with Excellent ASK-MI Score              | 84.2%                                      | 89.0%                           | 90.9%                       | 1.91 (df 2)            | 0.384   |
| % of Appointments with Full Agreement on SDM Excellence | 19.9%                                      | 33.8%                           | 26.7%                       | 11.73 (df 6)           | 0.068   |
| % Patients Perceived that Goals were Set                | 81.3%                                      | 79.1%                           | 80.0%                       | 0.22 (df 2)            | 0.90    |
| % Perceived Goals were Functional                       | 16.4%                                      | 6.3%                            | 14.3%                       | 8.627                  | 0.196   |
| % Providers Took HealthChange® Before                   | 20.7%                                      | 56.7%                           | 40.0%                       | 37.05 (df 4)           | < 0.001 |
| % Appointments in Private Area                          | 31.7%                                      | 69.2%                           | 68.6%                       | 46.25                  | < 0.001 |
| Income                                                  |                                            |                                 |                             | 43.09                  | < 0.001 |
| Less than \$59999                                       | 26.1%                                      | 40.9%                           | 20.6%                       |                        |         |
| \$60000 to 99999                                        | 26.8%                                      | 21.4%                           | 14.7%                       |                        |         |
| \$100000 or More                                        | 37.0%                                      | 12.3%                           | 23.5%                       |                        |         |
| Prefer not to answer                                    | 10.1%                                      | 25.3%                           | 41.2%                       |                        |         |

|                                 |       |       |       |              |       |
|---------------------------------|-------|-------|-------|--------------|-------|
| Rehabilitation Patient Received |       |       |       | 14.07 (df 4) | 0.007 |
| Physiotherapy                   | 69.7% | 87.2% | 74.3% |              |       |
| Occupational Therapy            | 27.0% | 10.6% | 25.7% |              |       |
| Other                           | 3.3%  | 2.1%  | 0%    |              |       |

**Table 6.** Comparison of Three Geographical Areas on SDM, Demographic and Contextual Variables

At T0, 19.4% of patients stated that they had not set a goal for their rehabilitation care (Figure 4). When patients had set a goal, they were asked to describe the goal. We categorized the patient-perceived goals based on level of functionality (Table 5). Only 11.4% of patients stated goals that met the Alberta Health Services' definition of functionality. A broader definition of functionality includes goals that aim for general improvements in, for example, mobility or strength. Under this broad definition, 42.6% of patients perceive their rehabilitation goals as aimed towards achievements or activities important to their life (Figure 5). Some 22.3% of patients perceived goals as equal to the treatment plan (e.g. doing home exercises, coming to appointments).

#### SDM, Goal-Setting, and Associated Factors

In the first phase, we used univariate Chi-square tests of correlation. SDM experience quality was not associated with whether patients' perceived that goals were set or whether patients' perceived goals that were functional. SDM experience was not associated with other immutable patient characteristics (e.g. gender, education, employment status, insurance access, income) or appointment type (Table 7). The only patient-related features associated with SDM timing of appointment (65.1% high-quality-SDM vs. 58.0% less-quality-SDM,  $p=0.035$ ).

| Variable                          | Patient & Provider Full Agreement on SDM Excellence? |              | Pearson Chi-Square Value (df) | P-value |
|-----------------------------------|------------------------------------------------------|--------------|-------------------------------|---------|
|                                   | Yes Count (%)                                        | No Count (%) |                               |         |
| Seen Provider Before Recruitment? |                                                      |              |                               |         |
| Yes                               | 76.9%                                                | 74.4%        | 0.313 (df 2)                  | 0.855   |
| No                                | 23.1%                                                | 25.6%        |                               |         |
| Appointment Timing at Recruitment |                                                      |              |                               |         |
| First Appointment                 | 27.9%                                                | 22.6%        | 13.57 (df 6)                  | 0.035   |
| Near Start of Care                | 37.2%                                                | 35.4%        |                               |         |

|                                                |                |                |                 |       |
|------------------------------------------------|----------------|----------------|-----------------|-------|
| Near End of Care<br>Last Appointment           | 30.2%<br>4.7%  | 38.7%<br>3.3%  |                 |       |
| Appointment Type<br>Group                      | 6.6%           | 9.5%           | 0.734 (df<br>2) | 0.693 |
| Individual                                     | 93.4%          | 90.5%          |                 |       |
| Where in Facility<br>Open Area                 | 39.8%          | 49.3%          | 7.05 (df<br>3)  | 0.070 |
| Private Area or Other                          | 60.2%          | 50.7%          |                 |       |
| Patient Perceived Goals<br>Set?                |                |                |                 |       |
| Yes                                            | 80.2%          | 81.7%          | 2.567 (df<br>2) | 0.277 |
| No                                             | 19.8%          | 18.3%          |                 |       |
| Perceived Goals were<br>Functional?            |                |                |                 |       |
| Yes                                            | 14.3%          | 10.9%          | 0.793 (df<br>2) | 0.673 |
| No                                             | 85.7%          | 89.1%          |                 |       |
| Female Gender                                  | 58.2%          | 58.6%          | 0.015 (df<br>2) | 0.993 |
| Marital Status<br>Married (incl common<br>law) | 72.5%<br>27.5% | 69.9%<br>30.1% | 3.08 (df<br>3)  | 0.379 |
| Not, or No Longer,<br>Married                  |                |                |                 |       |
| Education<br>High school diploma<br>or less    | 30.8%<br>69.2% | 26.5%<br>73.5% | 2.68 (df<br>3)  | 0.443 |
| Any post-secondary<br>education                |                |                |                 |       |
| Employment<br>Employed                         | 41.8%          | 42.9%          | 3.50 (df<br>6)  | 0.743 |
| Unemployed                                     | 16.5%          | 17.8%          |                 |       |
| Retired                                        | 41.8%          | 39.3%          |                 |       |
| Insurance<br>Yes                               | 45.1%          | 43.8%          | 7.515 (df<br>6) | 0.276 |
| No                                             | 41.8%          | 48.4%          |                 |       |
| Prefer not to answer                           | 13.2%          | 7.8%           |                 |       |
| Income<br>Less than \$59999                    | 34.3%          | 50.0%          | 5.91 (df<br>6)  | 0.43  |
| \$60000 to 99999                               | 27.4%          | 23.5%          |                 |       |
| \$100000 or More                               | 13.9%          | 11.8%          |                 |       |
| Prefer not to answer                           | 24.3%          | 14.7%          |                 |       |
| Provider Discipline<br>Physiotherapy           | 74.4%          | 81.3%          | 12.69 (df<br>6) | 0.048 |
| Occupational Therapy                           | 25.6%          | 15.5%          |                 |       |
| Other                                          | 0%             | 3.1%           |                 |       |
| Provider Took<br>HealthChange?                 |                |                | 11.11 (df<br>6) | 0.085 |
| Yes                                            | 73.9%          | 41.2%          |                 |       |
| No                                             | 26.1%          | 58.8%          |                 |       |

|                            |       |       |              |       |
|----------------------------|-------|-------|--------------|-------|
| Provider Trained in Canada | 85.3% | 83.2% | 0.264 (df 2) | 0.877 |
|----------------------------|-------|-------|--------------|-------|

**Table 7.** Relationship between Full Agreement on SDM (High Quality SDM) and Other Demographic or Contextual Factors

SDM experience was not associated with the providers' experience (in years since graduation) or the time since the provider took HealthChange®. SDM was not statistically-significantly associated with other features such as more privacy during the appointment (60.2% high-quality-SDM vs. 50.7% in low-quality-SDM,  $p=0.070$ ), non-physiotherapy (74.4% physiotherapy in high-quality-SDM vs. 81.3% physiotherapy in low-quality-SDM,  $p=0.091$ ) and if the provider had taken HealthChange® (73.9% in high-quality-SDM vs. only 41.2% high-quality-SDM if not taken,  $p=0.085$ ).

SDM and goal-setting varied across the three geographical areas (Table 5). More providers had taken HealthChange® ( $p<0.001$ ) in regional settings compared to rural and metropolitan settings. There was no difference in the proportion of patients with functional goals across geographies. Demographically, more patients had lower total family income in regional areas (40.9% lowest-income-bracket vs. 26.1% (metropolitan) or 20.6% (rural),  $p<0.001$ ). Contextually, metropolitan-urban areas were unique in that fewer appointments were in private areas (31.7% vs. 69.2% in regional and 68.6% in rural,  $p<0.001$ ) and fewer providers had taken person-centred behaviour-change training (HealthChange®) (20.7% vs. 56.7% in regional and 40.0% in rural,  $p<0.001$ ). Finally, occupational therapy was represented least often in regional-urban appointments (10.6% vs. 27.0% (metropolitan) and 25.7% (rural),  $p=0.007$ ).

A backwards, stepwise logistic regression was performed to ascertain the effects of appointment timing at recruitment, level of privacy (per location at setting), geographical setting, and whether the provider took HealthChange® on the likelihood that the patient and provider fully agreed on the excellence of the SDM experience. The final model included HealthChange® training and geographical setting, while appointment timing and privacy were removed as not statistically significant. The final model reveals the following relative risks ([95% confidence interval],  $p$ -value): 2.463 ([1.650,3.816],  $p<0.001$ ) for regional vs. metropolitan settings; 1.399 ([0.646,2.652],  $p=0.329$ ) for rural vs. metropolitan settings; and 0.439 ([0.284,0.649],  $p<0.001$ ) for taken HealthChange® vs. not taken. Providers who took the training were less likely to rate their interactions with the highest score (37/119 = 31.6%) when compared with providers who did not take the training (82/178 = 47.4%;  $P < 0.01$ ). Provider training was not associated with

patient ratings. Patients with providers who took the training did not rate their interactions as less favorable than patients with providers who did not take the training (69/119 = 61.6% vs 110/178 = 64.7%;  $P=0.876$ ).

Patients who perceived that a goal was set for their care saw a higher proportion of occupational therapists (35.5% vs. 14.7%,  $p=0.001$ ). While the time a provider knew the patient before T0 was associated with whether a goal was set ( $p=0.054$ ), the variance was high. Few other patient or provider characteristics were associated with patient perceptions of goal-setting. Patient perceptions of goal-setting for their rehabilitation did not differ by geographical setting, patient gender, marital status, education, employment status, or total family income (Table 8). Provider experience was not associated with patients' perceptions of goal-setting. Provider HealthChange® participation was not associated with patients' perception of goals setting or the functionality of the goal set.

| Variable                                                                        | Did Patient Perceive that a Goal was Set for Rehabilitation Care? |                          | Test Statistic Value (df) | P-value |
|---------------------------------------------------------------------------------|-------------------------------------------------------------------|--------------------------|---------------------------|---------|
|                                                                                 | Yes<br>Mean (SD)<br>OR %                                          | No<br>Mean (SD)<br>OR %  |                           |         |
| WatLX™ Overall Rehabilitation Experience                                        | 9.034 (1.251)                                                     | 8.717 (1.953)            | F=1.47 (df 1)             | 0.227   |
| Patient Age at T0                                                               | 57.23 (15.92)                                                     | 57.30 (18.14)            | F=0.001 (df 1)            | 0.974   |
| Provider's Experience                                                           | 14.05 (10.67)                                                     | 13.91 (10.17)            | F=0.008 (df 1)            | 0.930   |
| Time Patient Knew Provider                                                      | 11.51 (24.63)                                                     | 21.93 (51.61)            | F=3.760 (df 1)            | 0.054   |
| Months Since Provider Took HealthChange®                                        | 11.87 (19.86)                                                     | 19.65 (26.73)            | F=2.546 (df 1)            | 0.113   |
| % Patients with Female Gender                                                   | 59.6%                                                             | 54.0%                    | $\chi^2=0.666$ (df 1)     | 0.414   |
| % Providers took HealthChange®                                                  | 39.2%                                                             | 42.6%                    | $\chi^2=0.474$ (df 2)     | 0.789   |
| Where in Facility<br>Open Area<br>Private Area or<br>Other                      | 49.1%<br>50.9%                                                    | 37.5%<br>62.5%           | $\chi^2= 2.780$ (df 1)    | 0.095   |
| Marital Status<br>Married (incl<br>common law)<br>Not, or No Longer,<br>Married | 190 (71.2%)<br>77 (28.8%)                                         | 43 (65.2%)<br>23 (34.8%) | $\chi^2=0.910$ (df 1)     | 0.34    |

|                              |             |            |                       |       |
|------------------------------|-------------|------------|-----------------------|-------|
| Education                    |             |            | $\chi^2=1.612$ (df 1) | 0.204 |
| High school diploma or less  | 72 (27.0%)  | 23 (34.8%) |                       |       |
| Any post-secondary education | 195 (73.0%) | 43 (65.2%) |                       |       |
| Employment                   |             |            | $\chi^2=2.316$ (df 2) | 0.314 |
| Employed                     | 118 (44.2%) | 23 (34.3%) |                       |       |
| Unemployed                   | 46 (17.2%)  | 15 (22.4%) |                       |       |
| Retired                      | 103 (38.6%) | 29 (43.3%) |                       |       |
| Income                       |             |            | $\chi^2=2.458$ (df 3) | 0.483 |
| Less than \$59999            | 80 (30.7%)  | 25 (40.3%) |                       |       |
| \$60000 to 99999             | 63 (24.1%)  | 11 (17.7%) |                       |       |
| \$100000 or More             | 64 (24.5%)  | 14 (22.6%) |                       |       |
| Prefer not to answer         | 54 (20.7%)  | 12 (19.4%) |                       |       |
| Provider Discipline          |             |            | $\chi^2=13.79$ (df 2) | 0.001 |
| Physiotherapy                | 192 (82.8%) | 39 (62.9%) |                       |       |
| Occupational Therapy         | 34 (14.7%)  | 22 (35.5%) |                       |       |
| Other                        | 6 (2.6%)    | 1 (1.6%)   |                       |       |

**Table 8.** Clinically Relevant Differences Between Whether Patient Set a Goal or Not During Care and Other Variables

Finally, the mean (SD) overall WatLX™ rating of patient experience was 8.97 (1.39), where 10 was the highest rating. Item mean (SD) ratings ranged from 5.65 (1.35) to 6.79 (0.579) (7 was highest rating). Figure 6 demonstrates the distribution of responses along the 7-point Likert scale for these 10 items. The item with the greatest use of not applicable was having chosen family or friend given information that they needed about the patient's care, which suggests this question may not be relevant for many patients. The lowest rated items were for achieving treatment goals and controlling physical pain as much as possible. The highest-rated items were for being treated with courtesy, feeling safe during treatment activities and would recommend to others.

The mean (SD) overall rehabilitation experience when patients' experienced high-quality SDM experiences was 9.07 (1.57), and was not different from the experience of participants who reported "not high-quality" SDM (8.94 (1.41),  $p=0.735$ ). Similarly, patient perceptions of a goal being set was not associated with patients' overall rehabilitation experience rating (9.03 (1.25) vs. 8.72 (1.95),  $p=0.227$ ).

## Discussion

1  
2  
3  
4  
5  
6  
7  
8  
9  
10  
11  
12  
13  
14  
15  
16  
17  
18  
19  
20  
21  
22  
23  
24  
25  
26  
27  
28  
29  
30  
31  
32  
33  
34  
35  
36  
37  
38  
39  
40  
41  
42  
43  
44  
45  
46  
47  
48  
49  
50  
51  
52  
53  
54  
55  
56  
57  
58  
59  
60

These findings correspond with current literature but also provide a foundation for expansion [23–25, 55, 56]. Previous literature reviews suggested very negative and limited SDM experiences in rehabilitation [55]. A narrative synthesis (n=15 studies) revealed that in-patient rehabilitation goal-setting did not permit patient input, was overly-controlled by staff, was challenging for time and patient-load reasons, and involved parties lacking SDM knowledge [55]. Our data suggest that many patients and providers rate SDM-quality high even though some providers do take a leading (or controlling) role. For patients, the lowest ratings relate to the recognition of patient preferences, which is at the heart of SDM. Providers were more critical than patients on SDM experiences, which suggests a receptivity to strategies to improve SDM. This critical nature may be expanded by training in patient-centred care principles. Our multivariate analysis revealed that exposure to HealthChange® training decreased the likelihood of full agreement between the patient and provider on SDM excellence during the appointment. Further analyses revealed that provider training was not associated with patient ratings, but providers who took HealthChange® training were less likely to rate their interactions with the best (lowest) score. This finding also suggests that perhaps patients who tended to judge interactions as positive also tended to have providers who had taken the course.

While the literature in rehabilitation often conflates goal-setting and SDM [55, 57], our findings suggest that may be inappropriate. Patient-participant perceptions of whether goals were set, and the connection (or not) between set goals and patient lives, calls for further investigation. Nearly 1 in 5 patients in this provincial health-system did not set goals for their rehabilitation care. If goal functionality is modestly measured to include general and specific connections to patients' everyday activities, roles and responsibilities, then only every other patient set a goal in language that was meaningful to their lives and activities. Patient engagement and SDM are strategies to support movement towards meaningful goal-setting, which itself supports patients in working on treatment plans that motivate them and move them in the direction that they would like to go [6].

While full agreement on SDM excellence was less frequently associated with providers who took HealthChange®, most providers felt that HealthChange® influenced their patient interactions and site processes to some degree (76.9% and 53.8%, respectively). In addition, providers who took the training were less likely to rate their



1  
2  
3 interactions with the highest score (37/119 = 31.6%) when compared with providers  
4 who did not take the training (82/178 = 47.4%;  $P < 0.01$ ). Provider training was not  
5 associated with patient ratings. Patients with providers who took the training did not  
6 rate their interactions as less favorable than patients with providers who did not take  
7 the training (69/119 = 61.6% vs 110/178 = 64.7%;  $P=0.876$ ). This suggests that  
8 providers who took the training may be more discerning when judging their interactions  
9 with patients.  
10  
11  
12  
13

14 This work, however, may suffer from similar challenges as the train-the-trainer  
15 SDM-development activities completed previously in Europe that did not yield increased  
16 patient involvement in decision-making [24, 25]. In our study and that in Europe,  
17 providers perceive an impact of their training relating to the processual aspects of SDM,  
18 but in both cases a statistically-significant positive impacts on SDM is not determined  
19 between those with training and those without [24, 25]. More research is required to  
20 determine what facets of SDM and patient-centred communication training lead to  
21 tangible improvements in SDM experiences.  
22  
23  
24  
25  
26

27 Most non-modifiable patient characteristics (including age) were not significantly  
28 associated with the quality of SDM or goal-setting. Only total family income was  
29 associated with SDM experience. These findings corroborate the literature that SDM is  
30 a skill that can be taught and not an innate trait of an individual [58]. Total family  
31 income is a marker of socioeconomic status and relative vulnerability; it is not about  
32 capacity or education because education level was not associated with SDM experience.  
33 Further strategies and training are likely required to support providers and  
34 organizations in identifying, then approaching and empowering, more economically-  
35 vulnerable patients in SDM.  
36  
37  
38  
39  
40  
41

42 The literature describes SDM, while highly relational (conceptually and practically),  
43 is influenced by contextual factors such as time and setting [18, 59, 60]. Our findings  
44 do not quantify further details on the contextual factors. Our regression results  
45 suggested that geographical settings do vary on quality of SDM. Non-metropolitan areas,  
46 which often have more resources but busier clinics, had lower likelihoods of high-quality  
47 SDM experiences compared to rural and regional settings. Geographical areas did vary  
48 statistically on types of rehabilitation providers, months patient and provider knew  
49 each other, and, provider training in patient-centred principles. Finally, as different  
50 disciplines seem to have varying success with SDM, there may be an opportunity to  
51  
52  
53  
54  
55  
56  
57  
58  
59  
60

1  
2  
3 promote greater transdisciplinary learning, practice and sharing in community-  
4 rehabilitation sites. This would support the development of a community of practice,  
5 which would also sustain learnings from person-centred training (e.g. HealthChange®)  
6 through ongoing discussion.  
7  
8

9  
10 Based on participant demographics, these findings confidently apply to diverse  
11 community rehabilitation settings across Alberta. The patient population was fairly  
12 distributed amongst different family incomes, insurance access, and employment. These  
13 findings were not as highly represented from patients originating from rural  
14 communities, ethnocultural communities, and less-educated populations (i.e. less than  
15 high school).  
16  
17  
18

19  
20 Participating providers were mostly fairly experienced. The findings apply to hospital-  
21 based and community-based settings. These findings may not apply to new-graduates  
22 or providers trained outside of Canada. Most providers represented two rehabilitation  
23 disciplines: occupational therapy and physiotherapy. While several other disciplines  
24 were present to a lesser degree, it may be useful to examine these research questions  
25 where these other disciplines are more populous.  
26  
27  
28  
29

### 30 Limitations

31  
32 We recognize several study limitations. First, we tried to minimize recall (memory)  
33 bias by placing a 24-hour limit on participants to complete surveys, so the appointment  
34 is fresh in their minds. We recognize that patients may not have completed the survey  
35 on-time with take-home packages since it was outside the supervision of researchers  
36 and recruiters.  
37  
38  
39

40  
41 Second, we tried to lessen the risk of loss at 3-month follow-up using several tactics  
42 from Dillman et al. [61]. These tactics included allowing participant preference to dictate  
43 the form of follow-up (email or paper); using a mix of email and phone reminders both  
44 pre- and post- T1. We lost about 40% of patients at T1. Demographically, the patient-  
45 participants at recruitment and follow-up did not differ significantly on any patient  
46 characteristics.  
47  
48  
49

50  
51 Third, Phase-1 learnings suggested that there may be a selection bias and non-  
52 response bias. Patients with extreme experiences (either good or bad) could have been  
53 more interested in participation, which could differ significantly from the general  
54 patient-population experience. It was unlikely, given the difficulty in patient recruitment  
55  
56  
57  
58  
59  
60

1  
2  
3 generally, to recruit non-responders to participate in a non-responder survey. This  
4 study prioritized significant recruitment using convenience sampling to lessen the  
5 influence of these biases.  
6  
7

8 Fourth, there may have been a Hawthorne effect on providers wherein their  
9 knowledge of a study assessing their communication altered their communicative  
10 behaviours. A previous feasibility study demonstrated that rehabilitation professionals  
11 were accustomed to being observed during practice given their own training, the  
12 multidisciplinary players, and trainee presence at many sites. For patients, they would  
13 generally not know of the study until after their appointment, so their actions likely  
14 would not be influenced by reactive effects.  
15  
16  
17  
18

19 Fifth, there may have been acquiescence and social desirability bias whereby  
20 participants frequently endorsed positive statements and where participants wished to  
21 present themselves at their best, including being fully engaged in SDM. Historically, this  
22 has been shown to have a small but pervasive effect. To minimize this, we aimed to  
23 recruit until a high survey sample size and diversity of population were recruited.  
24  
25  
26

27 Sixth, for feasibility, survey tools were used differently from their original validation  
28 process. The WatLX™ was completed 3-months after recruitment which corresponded  
29 differently across patients' rehabilitation journey; not all patients completed the  
30 WatLX™ within the two weeks after care ended. Most patients stated at recruitment that  
31 they were neither at the first nor last appointment. Only 4.4% of patients were on their  
32 last appointment at recruitment. The most egregious difference in WatLX™ completion  
33 (i.e. 3 months after last appointment) was only possible for a rarity of participants. The  
34 gains made in data collection compared to the feasibility study suggest that this  
35 compromise in data collection was worthwhile. The resonance and corroboration of  
36 findings across methods and studies confirms that the tools remained valid.  
37  
38  
39  
40  
41  
42

43 Seventh, we cannot guarantee that ASK-MI survey completion was based on  
44 assessments of the recruitment-date appointment only rather than on the totality of  
45 experience with that patient, provider or clinic. Many participating patient comments in  
46 the ASK-MI referred to the entirety of their rehabilitation care. Patients may have felt  
47 that there was commonality or consistency in interactions across appointments, so it  
48 was then appropriate to assess SDM across the rehabilitation journey. Further research  
49 is required to understand when and how patients judge SDM in rehabilitation along the  
50 different points in the rehabilitation journey.  
51  
52  
53  
54  
55  
56  
57  
58  
59  
60

## Conclusions

While we recognize several study limitations, we believe our forethought and planning to consider and address these limits ensures the methodological rigour of this study. This study complements our qualitative findings,[62], that SDM is complex not monolithic in community rehabilitation. There is room to improve upon patient and provider practices of SDM and collaborative goal-setting in these settings, and we offer strategies such as further person-centred training, enhancing privacy during appointments, and building transdisciplinary communities of practice around how rehabilitation providers can approach SDM with patients. Further research is required to determine whether novel scoring of the ASK-MI influences SDM prevalence, which tactics to identify and redress the vulnerability of low-family-income patients are useful to advance SDM for this vulnerable group. This study suggests that SDM experience and goal-setting are not associated with longitudinal perceptions of rehabilitation experience and treatment goals being met, using a tool with high ceiling effects. We recommend more research into strategies that advance highly-functional goal-setting with patients, and to re-examine these relationships with tools without (or with less prominent) ceiling effects.

## **Acknowledgements**

We acknowledge our participants, both patient and provider, at the participating sites. We acknowledge the site managers, therapy assistants, clerks and non-participating providers at each site who were pivotal to recruitment and supporting the study more broadly. We particularly thank Jean Miller and Sylvia Teare, who are Patient and Community Engagement Researchers and who acted as patient consultants on this project. We thank the provincial and regional leadership at Alberta Health Services, including Lisa Warner and Elaine Finseth, who were (and continue to be) champions of this work. We also acknowledge Momentum Health, and their leadership Shaun Macauley, who were pivotal to the realization of this work.

## **Author Contributions:**

KPM helped contribute to the study's conceptualization and design. KPM implemented the study methodology, managed resources, and developed all manuscript drafts.

KO helped contribute to the study's conceptualization and provided ongoing supervision in close collaboration with the other senior authors (SV, TW) regarding its methods, conduct, analysis, and manuscript development.

KC helped contribute to the study's operationalization; provided ongoing support on conduct, analysis, and manuscript development; and, reviewed and edited this manuscript.

PF helped contribute to data analysis during study implementation, final write-up of the organizational report, and this manuscript's analyses and results and discussion write-up; and, reviewed and edited this manuscript.

SV helped contribute to the study's conceptualization and provided ongoing supervision in close collaboration with the other senior authors (KO, TW) regarding its methods, conduct, analysis, and manuscript development.

1  
2  
3 TW helped contribute to the study's conceptualization and provided ongoing  
4 supervision in close collaboration with the other senior authors (KO, SV) regarding its  
5 methods, conduct, analysis, and manuscript development.  
6  
7

8  
9  
10 **Competing Interests: none**

11  
12  
13 **Funding Support:**

14 This work was supported by the Canadian Institutes for Health Research Health System  
15 Impact Fellowship [Code 201705HI7-388576-170744, 2017]. Supplemental funding  
16 was provided by the Strategic Clinical Networks™ and Research Challenge portfolios at  
17 Alberta Health Services.  
18  
19

20  
21  
22 **Ethics Approval:** Research ethics board approval was secured for this study from the  
23 Conjoint Health Research Ethics Board, University of Calgary.  
24

25  
26  
27 **Provenance, Peer Review:** Not commissioned; externally peer reviewed.  
28

29  
30  
31 **Data Sharing Statement:** Availability of data and materials. For the data wherein  
32 patients consented to future data sharing, the de-identified data is currently being  
33 prepared for deposit in a secure data repository for data sharing upon application.  
34

35  
36  
37 **Patient Consent:** Patient-participants provided consent to share aggregated data in  
38 peer-reviewed publications.  
39

40  
41  
42 **Patient and Public Involvement:** Two Patient and Community Engagement  
43 Researchers (PaCERs) were involved in informing and vetting the research proposal  
44 including research questions, methods, data collection and plans for data analysis.  
45 Patients were not involved in study recruitment. Provider participants were invited to  
46 webinars describing the study findings. The PaCERs are acknowledged in the  
47 acknowledgement section, as was their preference.  
48  
49  
50

1  
2  
3 Figure 1. The Alberta Shared Decision-Making Measurement Instrument (ASK-MI)

4 Figure 2. Patient Responses on the Six ASK-MI Items on SDM Experience

5  
6 Figure 3. Provider Responses on the Six ASK-MI Items on SDM Experience

7  
8 Figure 4. Patient Perceptions of Goal Setting Occurrence

9  
10 Figure 5. Level of Functionality of Patient-Stated Goals

11 Figure 6. Patient Ratings of Experience on Individual WatLX™ Items

## 12 13 14 15 16 **References**

- 17  
18 [1] Department of Health. *Liberating the NHS: No decision about me without me*.  
19 London [https://www.gov.uk/government/uploads/system/uploads/attachment](https://www.gov.uk/government/uploads/system/uploads/attachment_data/file/216980/Liberating-the-NHS-No-decision-about-me-without-me-Government-response.pdf)  
20 [\\_data/file/216980/Liberating-the-NHS-No-decision-about-me-without-me-](https://www.gov.uk/government/uploads/system/uploads/attachment_data/file/216980/Liberating-the-NHS-No-decision-about-me-without-me-Government-response.pdf)  
21 [Government-response.pdf](https://www.gov.uk/government/uploads/system/uploads/attachment_data/file/216980/Liberating-the-NHS-No-decision-about-me-without-me-Government-response.pdf) (2010).  
22  
23  
24 [2] Pope TM. Certified Patient Decision Aids : Solving Persistent Problems with  
25 Informed Consent Law. *J Law Med Ethics* 2017; 45: 12–40.  
26  
27 [3] Canadian Institutes of Health Research. Strategy for Patient-Oriented Research  
28 (SPOR). Epub ahead of print 2019. DOI: 1.  
29  
30 [4] Alberta Innovates. The Alberta SPOR Support  
31 Unit [https://albertainnovates.ca/our-health-innovation-focus/the-alberta-spor-](https://albertainnovates.ca/our-health-innovation-focus/the-alberta-spor-support-unit/)  
32 [support-unit/](https://albertainnovates.ca/our-health-innovation-focus/the-alberta-spor-support-unit/) (2017, accessed 14 March 2017).  
33  
34 [5] Advisory Panel on Healthcare Innovation. *Unleashing Innovation: Excellent*  
35 *Healthcare for Canada* [http://www.healthycanadians.gc.ca/publications/health-](http://www.healthycanadians.gc.ca/publications/health-system-systeme-sante/report-healthcare-innovation-rapport-soins/alt/report-healthcare-innovation-rapport-soins-eng.pdf)  
36 [system-systeme-sante/report-healthcare-innovation-rapport-soins/alt/report-](http://www.healthycanadians.gc.ca/publications/health-system-systeme-sante/report-healthcare-innovation-rapport-soins/alt/report-healthcare-innovation-rapport-soins-eng.pdf)  
37 [healthcare-innovation-rapport-soins-](http://www.healthycanadians.gc.ca/publications/health-system-systeme-sante/report-healthcare-innovation-rapport-soins/alt/report-healthcare-innovation-rapport-soins-eng.pdf)  
38 [eng.pdf](http://www.healthycanadians.gc.ca/publications/health-system-systeme-sante/report-healthcare-innovation-rapport-soins/alt/report-healthcare-innovation-rapport-soins-eng.pdf) (2015).  
39  
40 [6] AHS Provincial Rehabilitation Forum. *Rehabilitation Strategic Plan 2016-2019*.  
41 Edmonton, AB [https://www.alberta-tr.org/media/46444/ahs-rehabilitation-](https://www.alberta-tr.org/media/46444/ahs-rehabilitation-strategic-plan-2016.pdf)  
42 [strategic-plan-2016.pdf](https://www.alberta-tr.org/media/46444/ahs-rehabilitation-strategic-plan-2016.pdf) (2016).  
43  
44 [7] Alberta Health Services. *Alberta Health Services Health Plan & Business Plan*  
45 *2016-17*. Edmonton,  
46 AB [https://www.albertahealthservices.ca/assets/about/publications/ahs-pub-](https://www.albertahealthservices.ca/assets/about/publications/ahs-pub-health-business-plan.pdf)  
47 [health-business-plan.pdf](https://www.albertahealthservices.ca/assets/about/publications/ahs-pub-health-business-plan.pdf) (2016).  
48  
49 [8] O'Connor AM, Wennberg JE, Legare F, et al. Toward the 'tipping point': Decision  
50 aids and informed patient choice. *Health Aff* 2007; 26: 716–725.  
51  
52  
53  
54  
55  
56  
57  
58  
59  
60

- 1  
2  
3 [9] Légaré F, Witteman HO. Shared decision making: Examining key elements and  
4 barriers to adoption into routine clinical practice. *Health Aff* 2013; 32: 276–284.  
5  
6 [10] Elwyn G, Frosch DL, Kobrin S. Implementing shared decision-making: consider  
7 all the consequences. *Implement Sci* 2015; 11: 114.  
8  
9 [11] Godolphin W. Shared decision-making. *Healthc Q* 2009; 12: e186–e190.  
10  
11 [12] Shay LA, Lafata JE. Where is the evidence? A systematic review of shared  
12 decision making and patient outcomes. *Med Decis Making* 2015; 35: 114–31.  
13  
14 [13] Kashaf S, McGill ET, Berger ZD. Shared decision-making and outcomes in type 2  
15 diabetes: A systematic review and meta-analysis. *Patient Educ Couns* 2017; 100:  
16 2159–2171.  
17  
18 [14] Flynn D, Knoedler MA, Hess EP, et al. Engaging Patients in Health Care  
19 Decisions in the Emergency Department Through Shared Decision-making: A  
20 Systematic Review. *Acad Emerg Med* 2012; 19: 959–967.  
21  
22 [15] Kew KM, Malik P, Aniruddhan K, et al. Shared decision-making for people with  
23 asthma ( Review ). *Cochrane Database Syst Rev*. Epub ahead of print 2017. DOI:  
24 10.1002/14651858.CD012330.pub2.www.cochranelibrary.com.  
25  
26 [16] Coxeter P, Del Mar CB, McGregor L, et al. Interventions to facilitate shared  
27 decision making to address antibiotic use for acute respiratory infections in  
28 primary care. *Cochrane Database Syst Rev* 2015; CD010907.  
29  
30 [17] Kashaf M, McGill E. Does Shared Decision Making in Cancer Treatment Improve  
31 Quality of Life? A Systematic Literature Review. *Med Decis Making* 2015; 35:  
32 1037–48.  
33  
34 [18] Légaré F, Ratté S, Gravel K, et al. Barriers and facilitators to implementing  
35 shared decision-making in clinical practice: Update of a systematic review of  
36 health professionals' perceptions. *Patient Educ Couns* 2008; 73: 526–535.  
37  
38 [19] Joseph-Williams N, Lloyd A, Edwards A, et al. Implementing shared decision  
39 making in the NHS: lessons from the MAGIC programme. *Bmj* 2017; 1744:  
40 j1744.  
41  
42 [20] Makoul G, Clayman ML. An integrative model of shared decision making in  
43 medical encounters. *Patient Educ Couns* 2006; 60: 301–12.  
44  
45 [21] Rose A, Rosewilliam S, Soundy A. Shared decision making within goal setting in  
46 rehabilitation settings: A systematic review. *Patient Educ Couns* 2017; 100: 65–  
47 75.  
48  
49  
50  
51  
52  
53  
54  
55  
56  
57  
58  
59  
60



- 1  
2  
3 [22] Wade DT. Goal setting in rehabilitation: an overview of what, why and how. *Clin Rehabil* 2009; 23: 291–295.  
4  
5  
6 [23] Körner M, Ehrhardt H, Steger A-K. Designing an interprofessional training  
7 program for shared decision making. *J Interprof Care* 2013; 27: 146–154.  
8  
9 [24] Körner M, Ehrhardt H, Steger AK, et al. Interprofessional SDM train-the-trainer  
10 program ‘Fit for SDM’: Provider satisfaction and impact on participation. *Patient  
11 Educ Couns* 2012; 89: 122–128.  
12  
13 [25] Koerner M Michaelis M, Ehrhardt H, Steger AK, Zerpies E, Bengel J WM. A  
14 multicentre cluster-randomized controlled study to evaluate a train-the-trainer  
15 programme for implementing internal and external participation in medical  
16 rehabilitation. *Clinical rehabilitation* 2014; 28: 20.  
17  
18 [26] Quaschnig K, Körner M, Wirtz M. Analyzing the effects of shared decision-  
19 making, empathy and team interaction on patient satisfaction and treatment  
20 acceptance in medical rehabilitation using a structural equation modeling  
21 approach. *Patient Educ Couns* 2013; 91: 167–175.  
22  
23 [27] Plewnia A Korner M BJ. Patient-centeredness and its impact on patient  
24 satisfaction and treatment outcomes in medical rehabilitation. *Patient education  
25 and counseling* 2016; 99: 2063.  
26  
27 [28] Grim K, Rosenberg D, Svedberg P, et al. Development and usability testing of a  
28 web-based decision support for users and health professionals in psychiatric  
29 services. *Spec Issue Digit Mob Ment Heal* 2017; 40: 293–302.  
30  
31 [29] Tomori K, Uezu S, Kinjo S, et al. Utilization of the iPad Application: Aid for  
32 Decision-making in Occupation Choice. *Occup Ther Int* 2012; 19: 88–97.  
33  
34 [30] Delany C, Galvin J. Ethics and shared decision-making in paediatric  
35 occupational therapy practice. *Dev Neurorehabil* 2014; 17: 347–354.  
36  
37 [31] Karol RL. Team models in neurorehabilitation: Structure, function, and culture  
38 change. *NeuroRehabilitation* 2014; 34: 655–669.  
39  
40 [32] Ness O, Borg M, Semb R, et al. ‘Walking alongside:’ collaborative practices in  
41 mental health and substance use care. *Int J Ment Health Syst* 2014; 8: 55.  
42  
43 [33] McMurray J, McNeil H, Lafortune C, et al. Measuring patients’ experience of  
44 rehabilitation services across the care continuum. Part II: Key dimensions. *Arch  
45 Phys Med Rehabil* 2016; 97: 121–130.  
46  
47 [34] McMurray J, McNeil H, Lafortune C, et al. Measuring patients’ experience of  
48  
49  
50  
51  
52  
53  
54  
55  
56  
57  
58  
59  
60

- 1  
2  
3 rehabilitation services across the care continuum. Part I: A systematic review of  
4 the literature. *Arch Phys Med Rehabil* 2016; 97: 104–120.
- 5  
6 [35] Scholl I, Loon MK, Sepucha K, et al. Measurement of shared decision making – a  
7 review of instruments. *Z Evid Fortbild Qual Gesundheitswes* 2011; 105: 313–324.
- 8  
9 [36] Scholl I, Kriston L, Dirmaier J, et al. Comparing the nine-item Shared Decision-  
10 Making Questionnaire to the OPTION Scale - an attempt to establish convergent  
11 validity. *Heal Expect* 2015; 18: 137–150.
- 12  
13 [37] Barr PJ, Elwyn G. Measurement challenges in shared decision making: putting  
14 the ‘patient’ in patient-reported measures. *Heal Expect* 2016; 19: 993–1001.
- 15  
16 [38] Bouniols N, Leclère B, Moret L. Evaluating the quality of shared decision making  
17 during the patient-carer encounter: a systematic review of tools. *BMC Res Notes*  
18 2016; 9: 382.
- 19  
20 [39] Légaré F, Moher D, Elwyn G, et al. Instruments to assess the perception of  
21 physicians in the decision-making process of specific clinical encounters: a  
22 systematic review. *BMC Med Inform Decis Mak* 2007; 7: 30.
- 23  
24 [40] Stubenrouch FE, Pieterse AH, Falkenberg R, et al. OPTION5 versus OPTION12  
25 instruments to appreciate the extent to which healthcare providers involve  
26 patients in decision-making. *Patient Educ Couns* 2016; 99: 1062–1068.
- 27  
28 [41] Barr PJ, O’Malley AJ, Tsulukidze M, et al. The psychometric properties of  
29 Observer OPTION5, an observer measure of shared decision making. *Patient*  
30 *Educ Couns* 2015; 98: 970–976.
- 31  
32 [42] Manhas KP, Olson K, Churchill K, et al. Experiences of shared decision-making  
33 in community rehabilitation: a focused ethnography. *BMC Health Serv Res* 2020;  
34 20: 329.
- 35  
36 [43] Olson K, et al. Development of the Alberta Shared Decision-Making  
37 Measurement Instrument. [In Press.]
- 38  
39 [44] Speziale HJS, Carpenter DR. *Qualitative Research in Nursing: Advancing the*  
40 *Humanistic Imperative*. Lippincott. Philadelphia, PA, 2007.
- 41  
42 [45] Spradley J. *The Ethnographic Interview*. Belmont, CA: Wadsworth, 1979.
- 43  
44 [46] Cruz E, Higginbottom G. The use of focused ethnography in nursing research.  
45 *Nurs Res* 2013; 20: 36–43.
- 46  
47 [47] Higginbottom G, Pillay JJ, Boadu NY. Guidance on Performing Focused  
48 Ethnographies with an Emphasis on Healthcare Research. *Qual Rep* 2013; 18:
- 49  
50  
51  
52  
53  
54  
55  
56  
57  
58  
59  
60

- 1  
2  
3 1–6.  
4  
5 [48] HealthChange Associates, Alberta Health Services. *Person-Centred Practice Using*  
6 *HealthChange Methodology*. Edmonton, AB, 2017.  
7  
8 [49] McMurray J, McNeil H, Elliott J, et al. WatLX: A system-wide patient experience  
9 measure for rehabilitation. In: *Canadian Association for Health Systems and*  
10 *Policy Research 2016 Conference: A Learning Healthcare System*. Toronto, ON,  
11 2016.  
12  
13 [50] Alberta Health Services. *Rehabilitation conceptual framework*. Edmonton, AB,  
14 2012.  
15  
16 [51] Howell DC. The analysis of missing data. In: Outhwaite W, Turner S (eds)  
17 *Handbook of Social Science Methodology*. London, UK:  
18 SAGE [http://www.uvm.edu/~dhowell/StatPages/Missing\\_Data/MissingDataFinal.pdf](http://www.uvm.edu/~dhowell/StatPages/Missing_Data/MissingDataFinal.pdf) (2008).  
19  
20 [52] Janssen MF, Pickard AS, Golicki D, et al. Measurement properties of the EQ-5D-  
21 5L compared to the EQ-5D-3L across eight patient groups: A multi-country  
22 study. *Qual Life Res* 2013; 22: 1717–1727.  
23  
24 [53] Gale J, Skouteris H. Health coaching: Facilitating health behaviour change for  
25 chronic condition prevention and self-management. In: Caltabiano M,  
26 Ricciardelli L (eds) *Handbook of Applied Topics in Health Psychology*. Wiley-  
27 Blackwell, 2013.  
28  
29 [54] Devet HCW, Terwee CB, Mokkink LB, et al. *Measurement in Medicine*.  
30 Cambridge, UK: Cambridge University Press, 2011.  
31  
32 [55] Rose A, Rosewilliam S, Soundy A. Shared decision making within goal setting in  
33 rehabilitation settings: A systematic review. *Patient Educ Couns* 2017; 100: 65–  
34 75.  
35  
36 [56] Koerner M, Wirtz M, Michaelis M, et al. A multicentre cluster-randomized  
37 controlled study to evaluate a train-the-trainer programme for implementing  
38 internal and external participation in medical rehabilitation. *Clin Rehabil* 2014;  
39 28: 20–35.  
40  
41 [57] Pritchard-Wiart L, Thompson-Hodgetts S, McKillop AB. A review of goal setting  
42 theories relevant to goal setting in paediatric rehabilitation. *Clin Rehabil*. Epub  
43 ahead of print 2019. DOI: 10.1177/0269215519846220.  
44  
45 [58] Légaré F, Thompson-Leduc P. Twelve myths about shared decision making.  
46  
47  
48  
49  
50  
51  
52  
53  
54  
55  
56  
57  
58  
59  
60

- 1  
2  
3 *Patient Educ Couns* 2014; 96: 281–286.
- 4 [59] Elwyn G, Scholl I, Tietbohl C, et al. "Many miles to go ...": a  
5 systematic review of the implementation of patient decision support  
6 interventions into routine clinical practice. *BMC Med Inform Decis Mak* 2013; 13  
7 Suppl 2: S14.
- 8 [60] Joseph-Williams N, Elwyn G, Edwards A. Knowledge is not power for patients: A  
9 systematic review and thematic synthesis of patient-reported barriers and  
10 facilitators to shared decision making. *Patient Educ Couns* 2014; 94: 291–309.
- 11 [61] Dillman D, Smyth J, Christian L. *Internet, mail and mixed-mode surveys: The*  
12 *tailored design method*. Hoboken, NJ: John Wiley & Sons, Ltd, 2009.
- 13 [62] Manhas KP, Olson K, Churchill K, et al. Shared Decision-Making Experiences in  
14 Community Rehabilitation in Alberta, Canada.
- 15  
16  
17  
18  
19  
20  
21  
22  
23  
24  
25  
26  
27  
28  
29  
30  
31  
32  
33  
34  
35  
36  
37  
38  
39  
40  
41  
42  
43  
44  
45  
46  
47  
48  
49  
50  
51  
52  
53  
54  
55  
56  
57  
58  
59  
60

**Figure 1.** The Alberta Shared Decision-Making Measurement Instrument (ASK-MI)

| <b>Alberta Shared Decision Making Measurement Instrument</b><br>(Patient/Client)                                                                                                                                                                                                                                                                                                                                                                                                                                                                                                                                                                                        |                |              |                  |                |                 |                   |                |
|-------------------------------------------------------------------------------------------------------------------------------------------------------------------------------------------------------------------------------------------------------------------------------------------------------------------------------------------------------------------------------------------------------------------------------------------------------------------------------------------------------------------------------------------------------------------------------------------------------------------------------------------------------------------------|----------------|--------------|------------------|----------------|-----------------|-------------------|----------------|
| <p>The purpose of this tool is to gather information about shared decision making between you and your health care provider. A shared decision is one that you and your health care provider make together, after considering options based on the best available evidence and your preferences. For the purposes of this tool, a health care provider is anyone with whom you have a clinical appointment regarding your health, such as a physician, a nurse, a nurse practitioner, a dietician, a social worker, a mental health therapist, or an exercise specialist.</p> <p>Instructions: Put an x in each row to indicate how strongly you agree or disagree.</p> |                |              |                  |                |                 |                   |                |
|                                                                                                                                                                                                                                                                                                                                                                                                                                                                                                                                                                                                                                                                         | Strongly Agree | Mostly Agree | Moderately Agree | Slightly Agree | Mostly Disagree | Strongly Disagree | Not Applicable |
| Q1. My health care provider and I agreed on the main concern(s) and focus of the visit.                                                                                                                                                                                                                                                                                                                                                                                                                                                                                                                                                                                 |                |              |                  |                |                 |                   |                |
| Q2. My health care provider and I worked together to make a plan that addressed my preferences.                                                                                                                                                                                                                                                                                                                                                                                                                                                                                                                                                                         |                |              |                  |                |                 |                   |                |
| Q3. The plan that my health care provider and I made considered my wishes and abilities.                                                                                                                                                                                                                                                                                                                                                                                                                                                                                                                                                                                |                |              |                  |                |                 |                   |                |
| Q4. My health care provider checked that I understood the plan.                                                                                                                                                                                                                                                                                                                                                                                                                                                                                                                                                                                                         |                |              |                  |                |                 |                   |                |
| Q5. My health care provider checked if I could follow the plan between now and my next appointment.                                                                                                                                                                                                                                                                                                                                                                                                                                                                                                                                                                     |                |              |                  |                |                 |                   |                |
| Q6. I agreed with the plan my health care provider and I made.                                                                                                                                                                                                                                                                                                                                                                                                                                                                                                                                                                                                          |                |              |                  |                |                 |                   |                |
| <p>Comments:</p>                                                                                                                                                                                                                                                                                                                                                                                                                                                                                                                                                                                                                                                        |                |              |                  |                |                 |                   |                |

1  
2  
3  
4  
5  
6  
7  
8  
9  
10  
11  
12  
13  
14  
15  
16  
17  
18  
19  
20  
21  
22  
23  
24  
25  
26  
27  
28  
29  
30  
31  
32  
33  
34  
35  
36  
37  
38  
39  
40  
41  
42  
43  
44  
45  
46  
47  
48  
49  
50  
51  
52  
53  
54  
55  
56  
57  
58  
59  
60

For peer review only

**Figure 2.** Patient Responses on the Six ASK-MI Items on SDM Experience

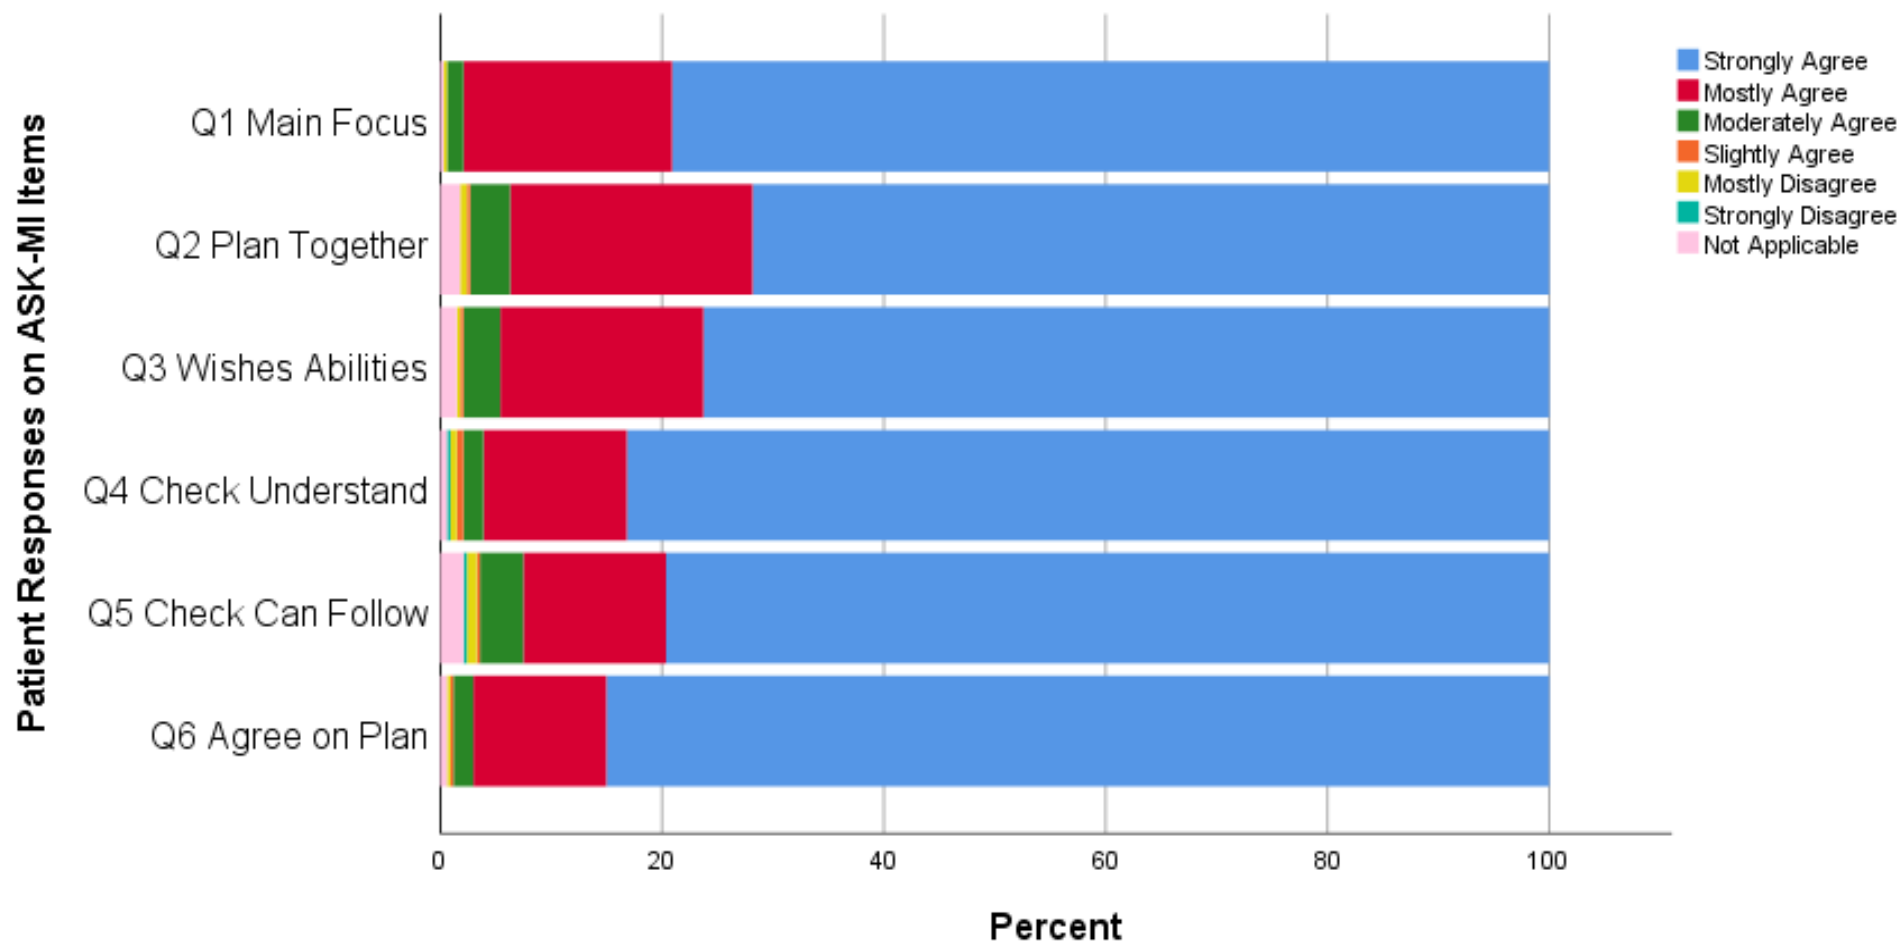

Figure 3. Provider Responses on the Six ASK-MI Items on SDM Experience

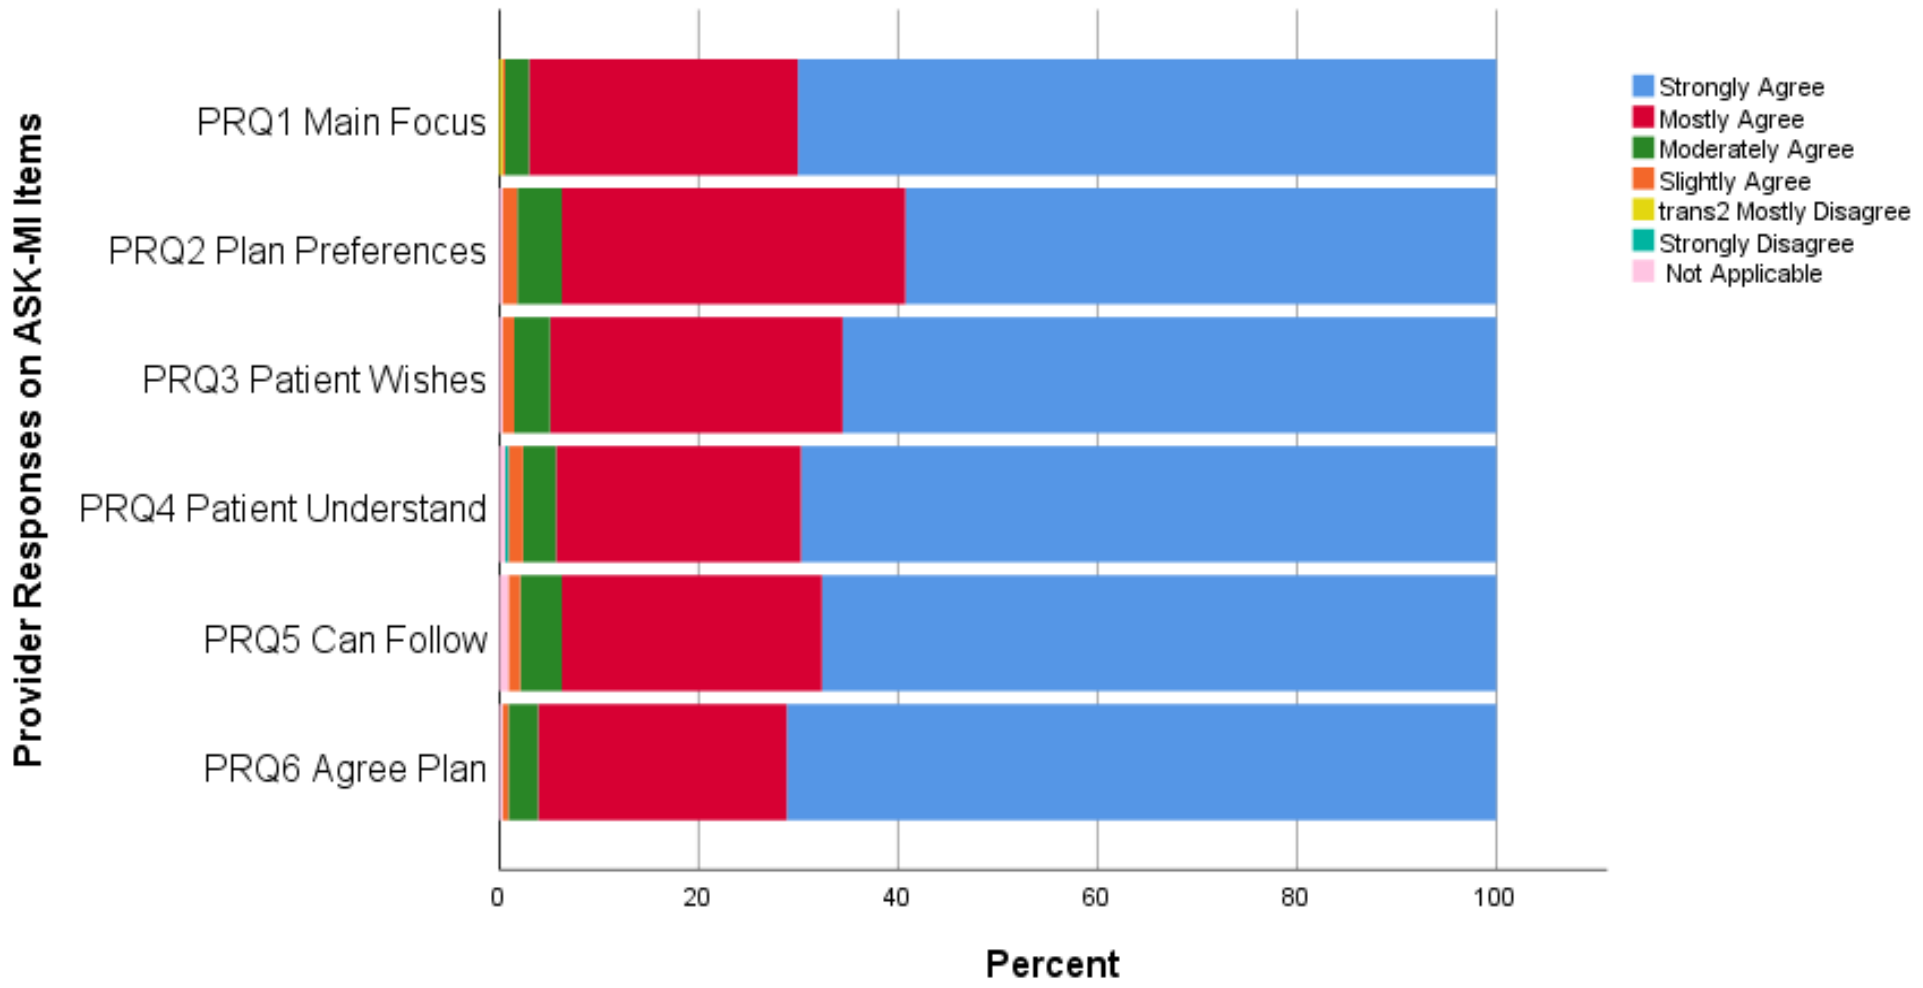



**Figure 4.** Patient Perceptions of Goal Setting Occurrence

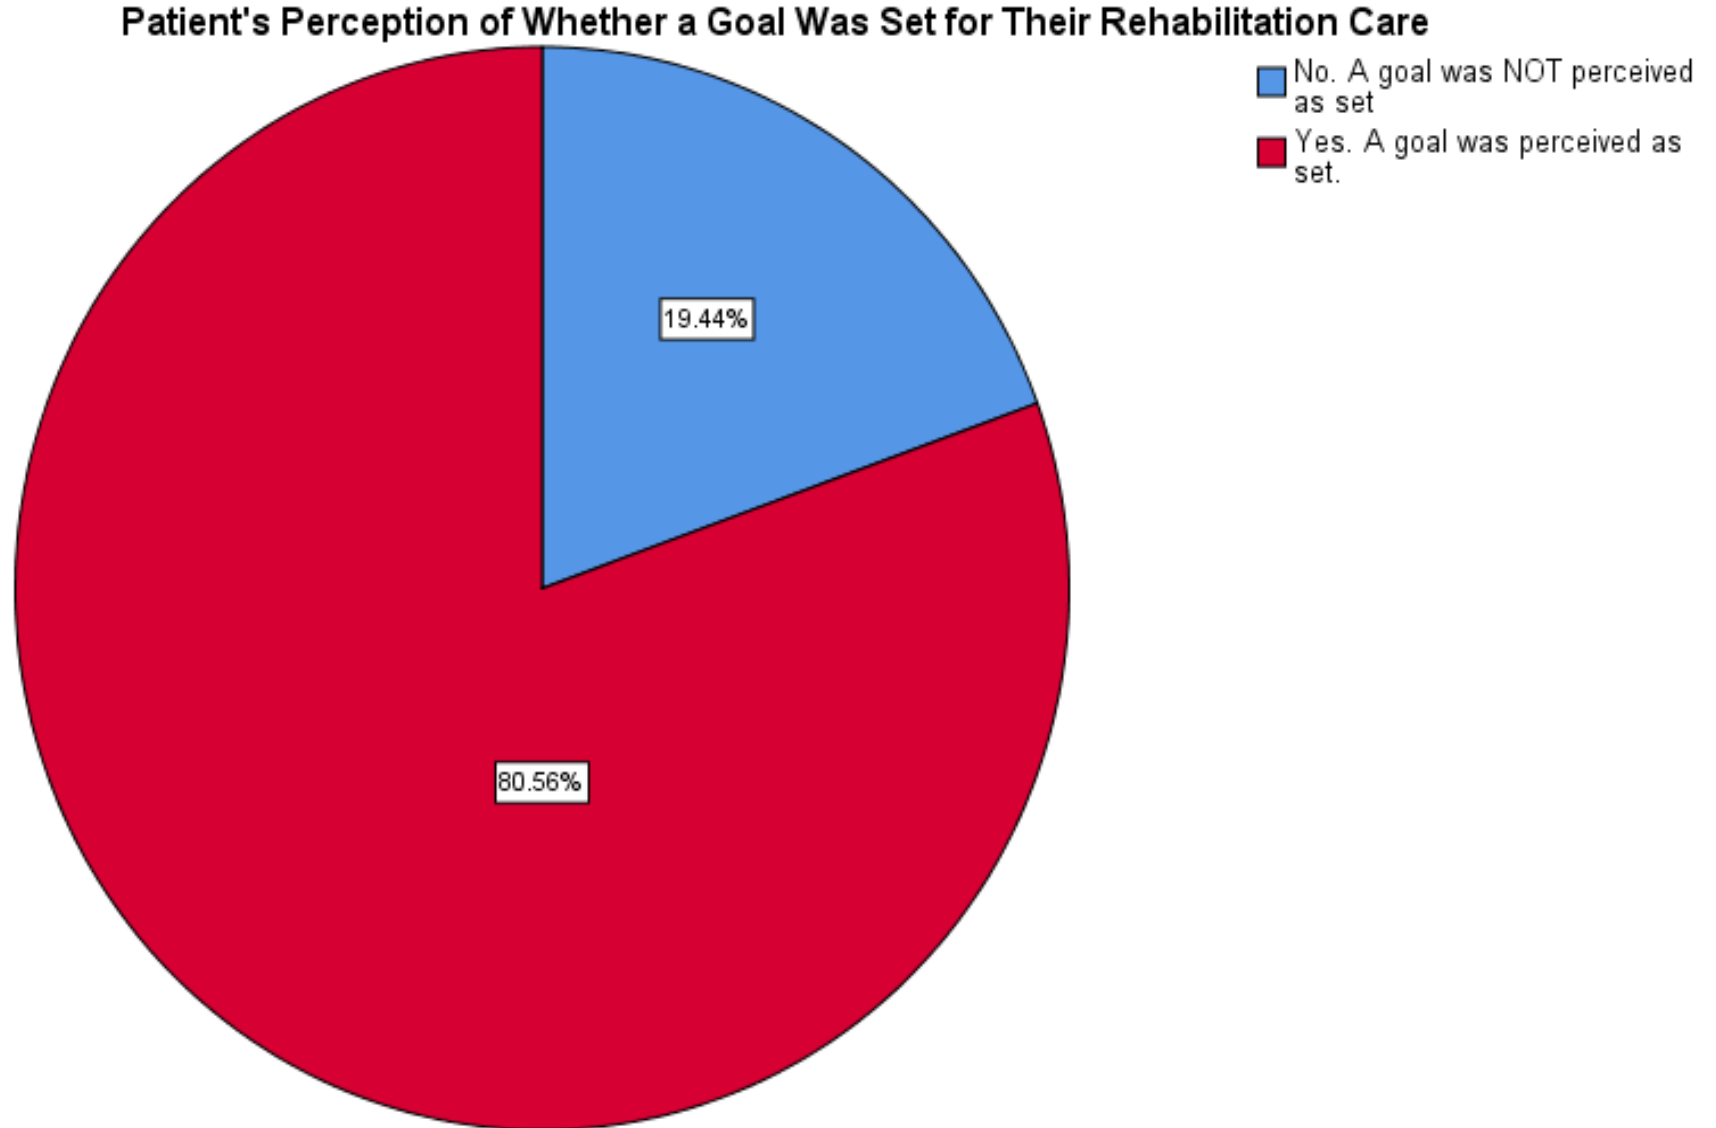

**Figure 5.** Level of Functionality of Patient-Stated Goals

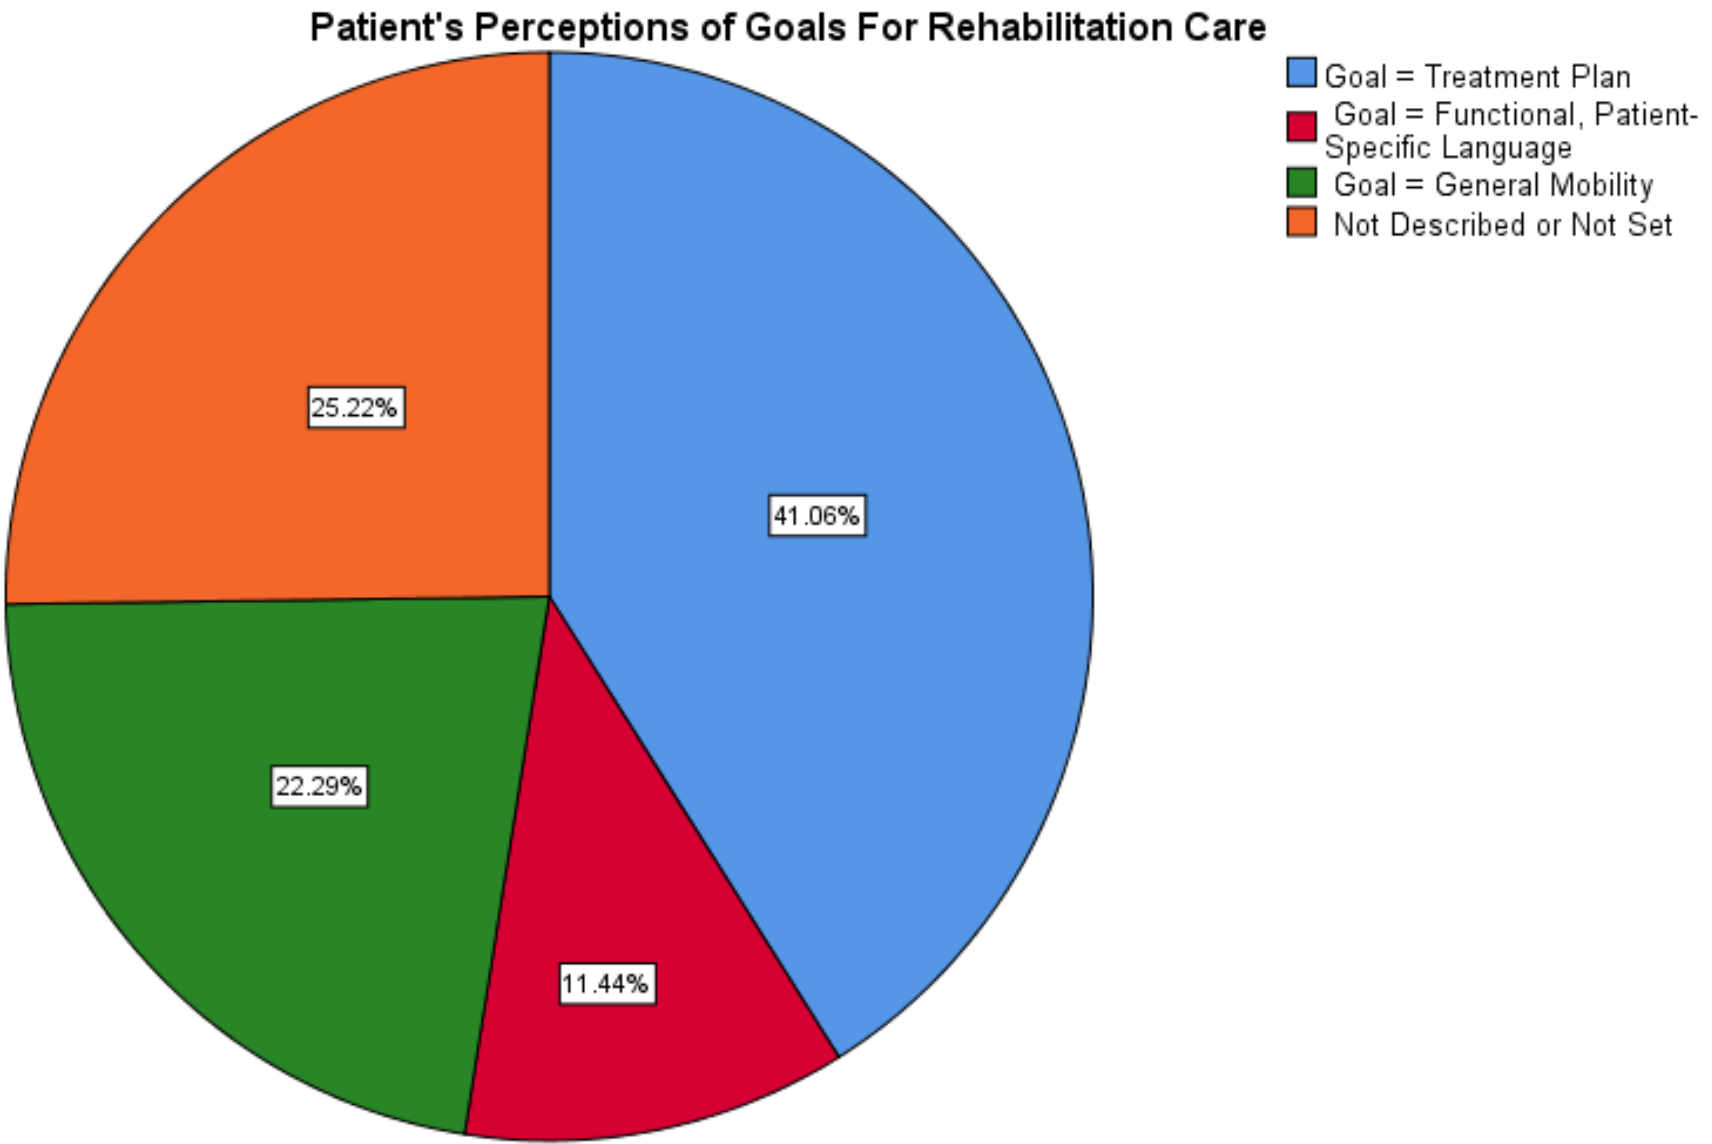

**Figure 6.** Patient Ratings of Experience on Individual WatLX™ Items

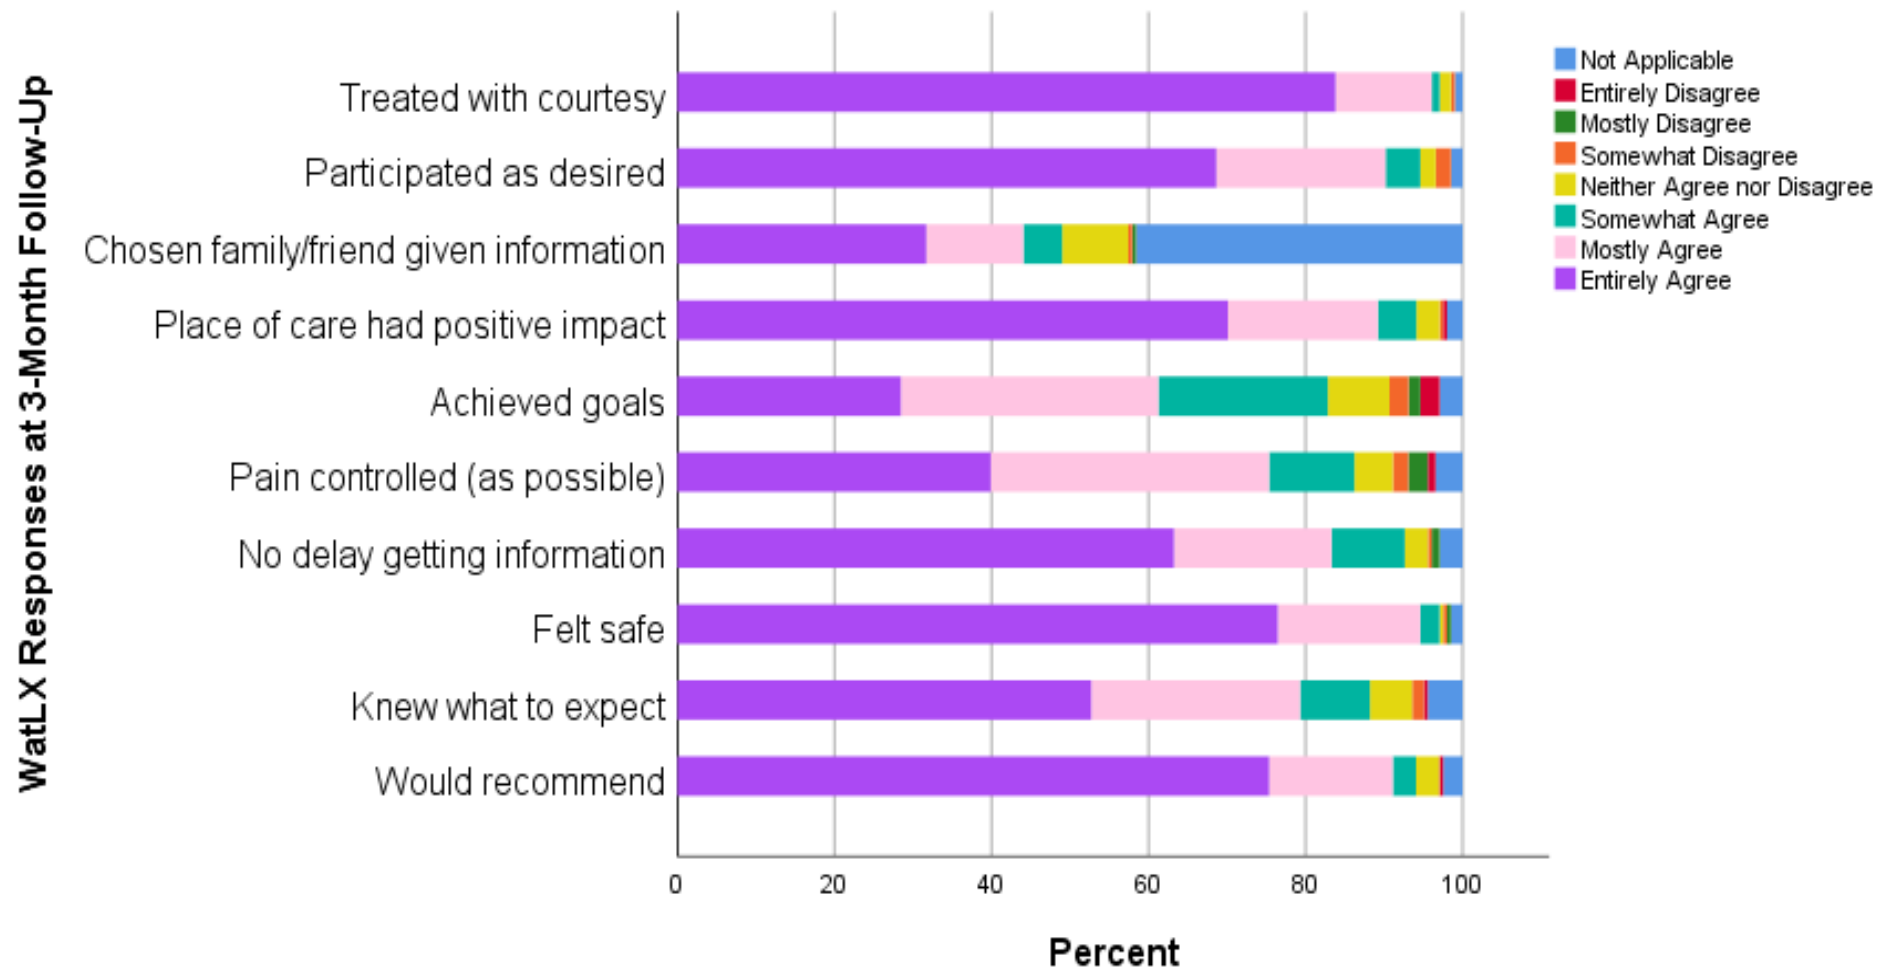

# Reporting checklist for cohort study.

Based on the STROBE cohort guidelines.

## Instructions to authors

Complete this checklist by entering the page numbers from your manuscript where readers will find each of the items listed below.

Your article may not currently address all the items on the checklist. Please modify your text to include the missing information. If you are certain that an item does not apply, please write "n/a" and provide a short explanation.

Upload your completed checklist as an extra file when you submit to a journal.

In your methods section, say that you used the STROBE cohort reporting guidelines, and cite them as:

von Elm E, Altman DG, Egger M, Pocock SJ, Gøtzsche PC, Vandenbroucke JP. The Strengthening of Reporting of Observational Studies in Epidemiology (STROBE) Statement: guidelines for reporting observational studies.

|                           |                     |                                                                                                 | Page Number |
|---------------------------|---------------------|-------------------------------------------------------------------------------------------------|-------------|
| <b>Title and abstract</b> |                     |                                                                                                 |             |
| Title                     | <a href="#">#1a</a> | Indicate the study's design with a commonly used term in the title or the abstract              | 1           |
| Abstract                  | <a href="#">#1b</a> | Provide in the abstract an informative and balanced summary of what was done and what was found | 1           |
| <b>Introduction</b>       |                     |                                                                                                 |             |
| Background / rationale    | <a href="#">#2</a>  | Explain the scientific background and rationale for the investigation being reported            | 3           |
| Objectives                | <a href="#">#3</a>  | State specific objectives, including any prespecified hypotheses                                | 4           |
| <b>Methods</b>            |                     |                                                                                                 |             |

|    |                      |                      |                                                                 |     |
|----|----------------------|----------------------|-----------------------------------------------------------------|-----|
| 1  | Study design         | <a href="#">#4</a>   | Present key elements of study design early in the paper         | 4   |
| 2  |                      |                      |                                                                 |     |
| 3  | Setting              | <a href="#">#5</a>   | Describe the setting, locations, and relevant dates, including  | 5   |
| 4  |                      |                      | periods of recruitment, exposure, follow-up, and data           |     |
| 5  |                      |                      | collection                                                      |     |
| 6  |                      |                      |                                                                 |     |
| 7  |                      |                      |                                                                 |     |
| 8  | Eligibility criteria | <a href="#">#6a</a>  | Give the eligibility criteria, and the sources and methods of   | 5   |
| 9  |                      |                      | selection of participants. Describe methods of follow-up.       |     |
| 10 |                      |                      |                                                                 |     |
| 11 | Eligibility criteria | <a href="#">#6b</a>  | For matched studies, give matching criteria and number of       | n/a |
| 12 |                      |                      | exposed and unexposed                                           |     |
| 13 |                      |                      |                                                                 |     |
| 14 |                      |                      |                                                                 |     |
| 15 |                      |                      |                                                                 |     |
| 16 | Variables            | <a href="#">#7</a>   | Clearly define all outcomes, exposures, predictors, potential   | 5   |
| 17 |                      |                      | confounders, and effect modifiers. Give diagnostic criteria, if |     |
| 18 |                      |                      | applicable                                                      |     |
| 19 |                      |                      |                                                                 |     |
| 20 |                      |                      |                                                                 |     |
| 21 | Data sources /       | <a href="#">#8</a>   | For each variable of interest give sources of data and details  | 5   |
| 22 | measurement          |                      | of methods of assessment (measurement). Describe                |     |
| 23 |                      |                      | comparability of assessment methods if there is more than       |     |
| 24 |                      |                      | one group. Give information separately for for exposed and      |     |
| 25 |                      |                      | unexposed groups if applicable.                                 |     |
| 26 |                      |                      |                                                                 |     |
| 27 |                      |                      |                                                                 |     |
| 28 |                      |                      |                                                                 |     |
| 29 |                      |                      |                                                                 |     |
| 30 | Bias                 | <a href="#">#9</a>   | Describe any efforts to address potential sources of bias       | 13  |
| 31 |                      |                      |                                                                 |     |
| 32 | Study size           | <a href="#">#10</a>  | Explain how the study size was arrived at                       | 5   |
| 33 |                      |                      |                                                                 |     |
| 34 | Quantitative         | <a href="#">#11</a>  | Explain how quantitative variables were handled in the          | 7   |
| 35 | variables            |                      | analyses. If applicable, describe which groupings were          |     |
| 36 |                      |                      | chosen, and why                                                 |     |
| 37 |                      |                      |                                                                 |     |
| 38 |                      |                      |                                                                 |     |
| 39 |                      |                      |                                                                 |     |
| 40 | Statistical          | <a href="#">#12a</a> | Describe all statistical methods, including those used to       | 7   |
| 41 | methods              |                      | control for confounding                                         |     |
| 42 |                      |                      |                                                                 |     |
| 43 | Statistical          | <a href="#">#12b</a> | Describe any methods used to examine subgroups and              | 7   |
| 44 | methods              |                      | interactions                                                    |     |
| 45 |                      |                      |                                                                 |     |
| 46 |                      |                      |                                                                 |     |
| 47 | Statistical          | <a href="#">#12c</a> | Explain how missing data were addressed                         | 7   |
| 48 | methods              |                      |                                                                 |     |
| 49 |                      |                      |                                                                 |     |
| 50 |                      |                      |                                                                 |     |
| 51 | Statistical          | <a href="#">#12d</a> | If applicable, explain how loss to follow-up was addressed      | 7   |
| 52 | methods              |                      |                                                                 |     |
| 53 |                      |                      |                                                                 |     |
| 54 |                      |                      |                                                                 |     |
| 55 | Statistical          | <a href="#">#12e</a> | Describe any sensitivity analyses                               | n/a |
| 56 | methods              |                      |                                                                 |     |
| 57 |                      |                      |                                                                 |     |
| 58 |                      |                      |                                                                 |     |
| 59 |                      |                      |                                                                 |     |
| 60 |                      |                      |                                                                 |     |

## Results

|    |                   |                      |                                                                       |
|----|-------------------|----------------------|-----------------------------------------------------------------------|
| 1  |                   |                      |                                                                       |
| 2  |                   |                      |                                                                       |
| 3  | Participants      | <a href="#">#13a</a> | Report numbers of individuals at each stage of study—eg 7             |
| 4  |                   |                      |                                                                       |
| 5  |                   |                      | numbers potentially eligible, examined for eligibility,               |
| 6  |                   |                      | confirmed eligible, included in the study, completing follow-         |
| 7  |                   |                      | up, and analysed. Give information separately for for                 |
| 8  |                   |                      | exposed and unexposed groups if applicable.                           |
| 9  |                   |                      |                                                                       |
| 10 |                   |                      |                                                                       |
| 11 | Participants      | <a href="#">#13b</a> | Give reasons for non-participation at each stage 7                    |
| 12 |                   |                      |                                                                       |
| 13 | Participants      | <a href="#">#13c</a> | Consider use of a flow diagram n/a                                    |
| 14 |                   |                      |                                                                       |
| 15 |                   |                      |                                                                       |
| 16 | Descriptive data  | <a href="#">#14a</a> | Give characteristics of study participants (eg demographic, 8         |
| 17 |                   |                      | clinical, social) and information on exposures and potential          |
| 18 |                   |                      | confounders. Give information separately for exposed and              |
| 19 |                   |                      | unexposed groups if applicable.                                       |
| 20 |                   |                      |                                                                       |
| 21 |                   |                      |                                                                       |
| 22 |                   |                      |                                                                       |
| 23 | Descriptive data  | <a href="#">#14b</a> | Indicate number of participants with missing data for each 8-11,      |
| 24 |                   |                      | variable of interest Tables                                           |
| 25 |                   |                      |                                                                       |
| 26 |                   |                      |                                                                       |
| 27 | Descriptive data  | <a href="#">#14c</a> | Summarise follow-up time (eg, average and total amount) 6             |
| 28 |                   |                      |                                                                       |
| 29 | Outcome data      | <a href="#">#15</a>  | Report numbers of outcome events or summary measures 8-11,            |
| 30 |                   |                      | over time. Give information separately for exposed and Tables         |
| 31 |                   |                      | unexposed groups if applicable.                                       |
| 32 |                   |                      |                                                                       |
| 33 |                   |                      |                                                                       |
| 34 | Main results      | <a href="#">#16a</a> | Give unadjusted estimates and, if applicable, confounder- 8-11,       |
| 35 |                   |                      | adjusted estimates and their precision (eg, 95% confidence Tables     |
| 36 |                   |                      | interval). Make clear which confounders were adjusted for             |
| 37 |                   |                      | and why they were included                                            |
| 38 |                   |                      |                                                                       |
| 39 |                   |                      |                                                                       |
| 40 |                   |                      |                                                                       |
| 41 | Main results      | <a href="#">#16b</a> | Report category boundaries when continuous variables were 8-11,       |
| 42 |                   |                      | categorized Tables                                                    |
| 43 |                   |                      |                                                                       |
| 44 |                   |                      |                                                                       |
| 45 | Main results      | <a href="#">#16c</a> | If relevant, consider translating estimates of relative risk into n/a |
| 46 |                   |                      | absolute risk for a meaningful time period                            |
| 47 |                   |                      |                                                                       |
| 48 |                   |                      |                                                                       |
| 49 | Other analyses    | <a href="#">#17</a>  | Report other analyses done—e.g., analyses of subgroups 7              |
| 50 |                   |                      | and interactions, and sensitivity analyses                            |
| 51 |                   |                      |                                                                       |
| 52 |                   |                      |                                                                       |
| 53 | <b>Discussion</b> |                      |                                                                       |
| 54 |                   |                      |                                                                       |
| 55 | Key results       | <a href="#">#18</a>  | Summarise key results with reference to study objectives 11-12        |
| 56 |                   |                      |                                                                       |
| 57 |                   |                      |                                                                       |
| 58 |                   |                      |                                                                       |
| 59 |                   |                      |                                                                       |
| 60 |                   |                      |                                                                       |

|    |                    |                     |                                                                |       |
|----|--------------------|---------------------|----------------------------------------------------------------|-------|
| 1  | Limitations        | <a href="#">#19</a> | Discuss limitations of the study, taking into account sources  | 13-14 |
| 2  |                    |                     | of potential bias or imprecision. Discuss both direction and   |       |
| 3  |                    |                     | magnitude of any potential bias.                               |       |
| 4  |                    |                     |                                                                |       |
| 5  |                    |                     |                                                                |       |
| 6  | Interpretation     | <a href="#">#20</a> | Give a cautious overall interpretation considering objectives, | 12-13 |
| 7  |                    |                     | limitations, multiplicity of analyses, results from similar    |       |
| 8  |                    |                     | studies, and other relevant evidence.                          |       |
| 9  |                    |                     |                                                                |       |
| 10 |                    |                     |                                                                |       |
| 11 | Generalisability   | <a href="#">#21</a> | Discuss the generalisability (external validity) of the study  | 13    |
| 12 |                    |                     | results                                                        |       |
| 13 |                    |                     |                                                                |       |
| 14 |                    |                     |                                                                |       |
| 15 | <b>Other</b>       |                     |                                                                |       |
| 16 | <b>Information</b> |                     |                                                                |       |
| 17 |                    |                     |                                                                |       |
| 18 |                    |                     |                                                                |       |
| 19 | Funding            | <a href="#">#22</a> | Give the source of funding and the role of the funders for the | 16    |
| 20 |                    |                     | present study and, if applicable, for the original study on    |       |
| 21 |                    |                     | which the present article is based                             |       |
| 22 |                    |                     |                                                                |       |
| 23 |                    |                     |                                                                |       |

24 None The STROBE checklist is distributed under the terms of the Creative Commons Attribution  
25 License CC-BY. This checklist can be completed online using <https://www.goodreports.org/>, a tool  
26 made by the [EQUATOR Network](#) in collaboration with [Penelope.ai](#)  
27  
28  
29  
30  
31  
32  
33  
34  
35  
36  
37  
38  
39  
40  
41  
42  
43  
44  
45  
46  
47  
48  
49  
50  
51  
52  
53  
54  
55  
56  
57  
58  
59  
60
